# Supplementary material for: CD14+ monocytes: the immune communication hub in early vasculitis symptoms of Kawasaki disease
Source: Front Immunol. 2025 Mar 26;16:1557231. doi: 10.3389/fimmu.2025.1557231 (PMC11979218; doi:10.3389/fimmu.2025.1557231)
Supplement: Supplementary Table 3 — Detailed Gene Functions of Co-expression Modules in CD4+T Cells of Three Groups Identified by WGCNA. [file Table3.xlsx]

## Sheet: early_blue_GO
Category	Term	Count	%	PValue	Genes	List Total	Pop Hits	Pop Total	Fold Enrichment	Bonferroni	Benjamini	FDR
UP_KW_CELLULAR_COMPONENT	KW-0963~Cytoplasm	69	58.9744	4.67252e-12	IFITM3, HSP90AB1, ARPC1B, HNRNPU, ADAR, YBX1, IKZF1, ETS1, GIMAP7, GLS, RBM3, FTH1, NCK2, JAK3, DENND2D, ACTR3, CDV3, ACTR2, MBNL1, SMARCC1, HSP90AA1, CIRBP, RPL13A, INPP4A, MZT2B, PTP4A2, SFPQ, MAP7D1, RPL37A, MYH9, PLEKHO1, SYNC, KHDRBS1, SET, MYCBP, CAB39, CTBP1, CUL3, GNAI2, ABLIM1, PPP3R1, HNRNPDL, ATXN7, PCBP1, DNAJC21, PCBP2, CSK, RPS2, RPL17, MCL1, TSNAX, RPL41, OPN3, MTRNR2L12, PLCL2, PY…	105	5805	17942	2.03109	1.3083e-10	1.30831e-10	1.26158e-10
GOTERM_CC_DIRECT	GO:0005829~cytosol	65	55.5556	1.80285e-11	EIF4A2, EIF4E3, HSP90AB1, ARPC1B, HNRNPU, ADAR, YBX1, IKZF1, RCSD1, GLS, ELK4, FTH1, NCK2, JAK3, DENND2D, ACTR3, CDV3, ACTR2, MBNL1, HSP90AA1, RPL13A, TGFBR2, EEF1G, INPP4A, MZT2B, PTP4A2, SFPQ, RPL37A, MYH9, SYNC, KHDRBS1, SET, CAB39, CUL3, PDS5A, SRM, GNAI2, PPP3R1, HNRNPDL, ATXN7, PCBP1, DNAJC21, PCBP2, CSK, RPS2, RPL17, MCL1, TSNAX, RPL41, OPN3, ERAP1, LNPEP, ARPC4, NFKB1, RPS26, REST, CNOT11…	113	5649	20887	2.12686	4.34486e-09	4.34487e-09	4.05641e-09
GOTERM_MF_DIRECT	GO:0003723~RNA binding	33	28.2051	2.37401e-11	TRIR, EIF4A2, KHDRBS1, HSP90AB1, HNRNPU, ADAR, YBX1, SAMHD1, RBM3, RBM15B, HNRNPDL, PCBP1, DNAJC21, PCBP2, RPS2, RPL17, TSNAX, SPEN, RPL41, HSP90AA1, MBNL1, CIRBP, RPL13A, HLA-A, RPS26, SFPQ, RPL37A, HNRNPD, MYH9, RPS20, HDGF, TARDBP, NOP53	113	1455	19304	3.87454	7.00334e-09	7.00333e-09	6.83715e-09
GOTERM_CC_DIRECT	GO:0005654~nucleoplasm	53	45.2991	6.29647e-11	BTG1, HSP90AB1, HNRNPU, ADAR, YBX1, IKZF1, ETS1, RBM3, ELK4, DENND2D, PBRM1, MBNL1, SMARCC1, HSP90AA1, CIRBP, INPP4A, MZT2B, SFPQ, CGGBP1, KHDRBS1, SET, MYCBP, CTBP1, CUL3, BOD1L1, HIGD1A, PDS5A, SAMHD1, GNAI2, TGOLN2, PPP3R1, RBM15B, HNRNPDL, ATXN7, PCBP1, PCBP2, CSK, RPS2, MCL1, TSNAX, SPEN, OPN3, NFKB1, RPS26, REST, ID2, HNRNPD, RPS20, ATM, HDGF, TARDBP, SMAP2, NOP53	113	4030	20887	2.43091	1.51745e-08	7.58724e-09	7.08353e-09
GOTERM_MF_DIRECT	GO:0005515~protein binding	102	87.1795	2.74971e-09	TRIR, IFITM3, EIF4A2, TRAF3IP3, HNRNPU, IKZF1, ETS1, GIMAP7, MT-ND3, GLS, ELK4, HMCES, FTH1, MBNL1, SMARCC1, ANKRD44, CIRBP, HLA-A, INPP4A, MT-CO2, PTPRCAP, IL6ST, CGGBP1, KHDRBS1, SET, CTBP1, CUL3, BOD1L1, PDS5A, TGOLN2, PPP3R1, HNRNPDL, ATXN7, PCBP1, DNAJC21, PCBP2, MCL1, RPL41, OPN3, ARPC4, LNPEP, PYCR2, NFKB1, RPS26, CNOT11, ID2, GNB1, HNRNPD, GNAS, RPS20, ATM, STT3B, CLPTM1L, RNF220, BTG1, H…	113	12754	19304	1.36623	8.11163e-07	4.05582e-07	3.95958e-07
GOTERM_CC_DIRECT	GO:0005737~cytoplasm	61	52.1368	5.2427e-09	BTG1, HSP90AB1, ARPC1B, ADAR, YBX1, ETS1, RBM3, FTH1, NCK2, ACTR3, CDV3, ACTR2, MBNL1, SMARCC1, HSP90AA1, CIRBP, RPL13A, EEF1G, INPP4A, MZT2B, PTP4A2, MAP7D1, RPL37A, MYH9, PLEKHO1, KHDRBS1, SET, MYCBP, CAB39, CUL3, GNAI2, ABLIM1, HNRNPDL, PCBP1, DNAJC21, PCBP2, CSK, RPS2, RPL17, MCL1, TSNAX, RPL41, OPN3, MTRNR2L12, ERAP1, PLCL2, LNPEP, PYCR2, ARPC4, NFKB1, RPS26, REST, CNOT11, ID2, GNB1, GNAS, R…	113	5754	20887	1.95956	1.26349e-06	4.21163e-07	3.93202e-07
UP_KW_PTM	KW-1017~Isopeptide bond	36	30.7692	8.17462e-09	IFITM3, EIF4A2, KHDRBS1, SET, CTBP1, CUL3, BOD1L1, HNRNPU, ADAR, IKZF1, YBX1, SAMHD1, ETS1, ELK4, RBM15B, ABLIM1, HNRNPDL, ATXN7, PCBP1, HMCES, PCBP2, RPS2, MCL1, TSNAX, SMARCC1, PBRM1, NFKB1, EEF1G, SFPQ, MAP7D1, GNAS, HNRNPD, RPS20, HDGF, TARDBP, RNF220	98	1876	14252	2.79074	1.71667e-07	1.79842e-07	1.55318e-07
GOTERM_CC_DIRECT	GO:0005634~nucleus	60	51.2821	2.47425e-07	BTG1, HSP90AB1, ARPC1B, HNRNPU, ADAR, YBX1, IKZF1, ETS1, RBM3, ELK4, FTH1, ACTR3, ACTR2, PBRM1, MBNL1, SMARCC1, HSP90AA1, CIRBP, RPL13A, EEF1G, INPP4A, PTP4A2, SFPQ, RPL37A, MYH9, PLEKHO1, CGGBP1, KHDRBS1, SET, MYCBP, CTBP1, CUL3, PDS5A, SAMHD1, PARL, RBM15B, HNRNPDL, ATXN7, PCBP1, PCBP2, RPS2, RPL17, MCL1, TSNAX, SPEN, OPN3, ARPC4, NFKB1, PNRC1, KLF2, REST, CNOT11, STK17A, ID2, GNAS, HNRNPD, ATM…	113	6175	20887	1.79602	5.96277e-05	1.49074e-05	1.39177e-05
UP_KW_PTM	KW-0832~Ubl conjugation	41	35.0427	3.08372e-07	IFITM3, KHDRBS1, SET, HSP90AB1, CTBP1, CUL3, BOD1L1, HNRNPU, ADAR, IKZF1, YBX1, SAMHD1, ETS1, ELK4, RBM15B, ABLIM1, HNRNPDL, ATXN7, PCBP1, HMCES, PCBP2, RPS2, MCL1, TSNAX, SMARCC1, PBRM1, HSP90AA1, HLA-A, NFKB1, KLF2, EEF1G, SFPQ, REST, MAP7D1, GNAS, HNRNPD, MYH9, RPS20, HDGF, TARDBP, RNF220	98	2701	14252	2.20754	6.4758e-06	3.39209e-06	2.92954e-06
UP_SEQ_FEATURE	CROSSLNK:Glycyl lysine isopeptide (Lys-Gly) (interchain with G-Cter in SUMO2)	23	19.6581	1.26168e-06	TSNAX, KHDRBS1, SMARCC1, PBRM1, HNRNPU, ADAR, YBX1, SAMHD1, ETS1, NFKB1, EEF1G, ELK4, RBM15B, ABLIM1, SFPQ, HNRNPDL, PCBP1, HMCES, MAP7D1, PCBP2, HNRNPD, TARDBP, RNF220	113	1277	20569	3.27847	0.000905473	0.000905883	0.000905883
UP_KW_PTM	KW-0597~Phosphoprotein	80	68.3761	2.04064e-06	IFITM3, EIF4A2, BTG1, HSP90AB1, HNRNPU, ADAR, YBX1, IKZF1, RCSD1, ETS1, GLS, RBM3, ELK4, FTH1, HMCES, NCK2, JAK3, CDV3, PBRM1, MBNL1, SMARCC1, HSP90AA1, CIRBP, RPL13A, HLA-A, TGFBR2, INPP4A, MZT2B, SFPQ, MAP7D1, PPDPF, MYH9, PLEKHO1, PTPRCAP, SYNC, IL6ST, CGGBP1, KHDRBS1, SET, CTBP1, CUL3, BOD1L1, HIGD1A, PDS5A, SAMHD1, PARL, FAM117B, TGOLN2, ABLIM1, PPP3R1, RBM15B, HNRNPDL, PCBP1, DNAJC21, PCBP2…	98	8417	14252	1.38224	4.28526e-05	1.49647e-05	1.29241e-05
GOTERM_MF_DIRECT	GO:0003697~single-stranded DNA binding	8	6.83761	4.01975e-06	TSNAX, HNRNPDL, PCBP1, HMCES, PCBP2, HNRNPU, YBX1, SAMHD1	113	112	19304	12.2023	0.00118513	0.000395275	0.000385896
UP_KW_MOLECULAR_FUNCTION	KW-0687~Ribonucleoprotein	12	10.2564	1.02333e-05	RPS26, RPL41, HNRNPDL, PCBP1, PCBP2, RPL37A, HNRNPD, RPL13A, HNRNPU, RPS20, RPS2, RPL17	83	316	11889	5.43953	0.000460394	0.000254354	0.000243049
UP_KW_MOLECULAR_FUNCTION	KW-0694~RNA-binding	18	15.3846	1.13046e-05	SPEN, EIF4A2, TRIR, KHDRBS1, MBNL1, EIF4E3, CIRBP, HNRNPU, ADAR, YBX1, RBM3, RBM15B, SFPQ, HNRNPDL, PCBP1, PCBP2, HNRNPD, TARDBP	83	751	11889	3.43321	0.000508581	0.000254354	0.000243049
GOTERM_BP_DIRECT	GO:0002181~cytoplasmic translation	7	5.98291	1.62478e-05	RPS26, RPL41, RPL37A, RPL13A, RPS20, RPS2, RPL17	110	97	19734	12.9464	0.0146608	0.0147692	0.0146555
GOTERM_MF_DIRECT	GO:0003729~mRNA binding	10	8.54701	2.72612e-05	SPEN, RPS26, KHDRBS1, RBM15B, HSP90AA1, PCBP1, PCBP2, RPL13A, YBX1, RPS2	113	269	19304	6.35063	0.00800992	0.00201052	0.00196281
KEGG_PATHWAY	hsa05171:Coronavirus disease - COVID-19	10	8.54701	3.73497e-05	RPS26, RPL41, RPL37A, RPL13A, RPS20, ADAR, RPS2, IL6ST, RPL17, NFKB1	63	238	8840	5.89569	0.00759053	0.00761934	0.0070591
GOTERM_CC_DIRECT	GO:0070469~respirasome	4	3.4188	4.12779e-05	MT-CO2, MT-CYB, HIGD1A, MT-ND3	113	13	20887	56.8741	0.00989886	0.00198959	0.0018575
UP_KW_PTM	KW-0007~Acetylation	43	36.7521	4.18376e-05	TRIR, KHDRBS1, SET, HSP90AB1, CUL3, BOD1L1, HNRNPU, YBX1, HIGD1A, PDS5A, SAMHD1, ETS1, SRM, GLS, HNRNPDL, PCBP1, FTH1, NCK2, CSK, RPS2, ACTR3, CDV3, ACTR2, SMARCC1, PBRM1, HSP90AA1, PLCL2, RPL13A, PYCR2, LNPEP, ARPC4, MT-ATP8, NFKB1, EEF1G, SFPQ, GNB1, HNRNPD, MYH9, RPS20, ATM, HDGF, STT3B, NOP53	98	3511	14252	1.7811	0.000878223	0.000230107	0.000198729
GOTERM_CC_DIRECT	GO:0005885~Arp2/3 protein complex	4	3.4188	5.23303e-05	ACTR3, ACTR2, ARPC1B, ARPC4	113	14	20887	52.8116	0.0125327	0.00210193	0.00196239
KEGG_PATHWAY	hsa04659:Th17 cell differentiation	7	5.98291	0.000102044	HSP90AA1, PPP3R1, HSP90AB1, IL6ST, JAK3, NFKB1, TGFBR2	63	108	8840	9.09465	0.0206028	0.0104085	0.00964315
GOTERM_CC_DIRECT	GO:0070062~extracellular exosome	27	23.0769	0.000124994	HSP90AB1, CAB39, CUL3, ARPC1B, YBX1, GNAI2, PCBP1, FTH1, PCBP2, CSK, RPS2, SPEN, ACTR3, ACTR2, HSP90AA1, ERAP1, ARPC4, HLA-A, EEF1G, RPS26, RPL37A, GNB1, GNAS, MYH9, CD48, RPS20, IL6ST	113	2258	20887	2.21023	0.0296761	0.00420158	0.00392264
UP_SEQ_FEATURE	CROSSLNK:Glycyl lysine isopeptide (Lys-Gly) (interchain with G-Cter in SUMO2); alternate	10	8.54701	0.000127301	KHDRBS1, SFPQ, SMARCC1, PBRM1, ATXN7, HNRNPU, ADAR, HDGF, RPS2, ETS1	113	350	20569	5.20076	0.0873546	0.0378687	0.0378687
GOTERM_CC_DIRECT	GO:1990904~ribonucleoprotein complex	8	6.83761	0.000139472	RPL41, HNRNPDL, PCBP1, PCBP2, HNRNPD, RPL13A, HNRNPU, YBX1	113	210	20887	7.04155	0.0330563	0.00420158	0.00392264
BIOCARTA	h_mPRPathway:How Progesterone Initiates the Oocyte Maturation	6	5.12821	0.000143035	ACTR3, ACTR2, ARPC1B, GNB1, GNAS, ARPC4	27	34	1623	10.6078	0.0156119	0.0157339	0.0153048
UP_SEQ_FEATURE	COMPBIAS:Basic and acidic residues	50	42.735	0.000158226	TRIR, IFITM3, HSP90AB1, HNRNPU, ADAR, YBX1, IKZF1, RCSD1, GLS, ELK4, HMCES, CDV3, PBRM1, SMARCC1, HSP90AA1, RPL13A, HLA-A, EEF1G, SFPQ, MAP7D1, MYH9, PLEKHO1, SYNC, CGGBP1, SET, CUL3, BOD1L1, PDS5A, SAMHD1, FAM117B, TGOLN2, ABLIM1, RBM15B, ATXN7, DNAJC21, RPS2, MCL1, TSNAX, SPEN, OPN3, PLCL2, NFKB1, KLF2, RPS26, REST, GNAS, HNRNPD, HDGF, SMAP2, NOP53	113	5658	20569	1.60858	0.107398	0.0378687	0.0378687
SMART	SM00360:RRM	8	6.83761	0.00023436	SPEN, RBM3, RBM15B, SFPQ, HNRNPDL, HNRNPD, CIRBP, TARDBP	62	219	10692	6.2996	0.015812	0.0159364	0.0159364
GOTERM_BP_DIRECT	GO:0000122~negative regulation of transcription by RNA polymerase II	16	13.6752	0.000263147	SPEN, KHDRBS1, CTBP1, CUL3, HNRNPU, YBX1, NFKB1, KLF2, ELK4, SFPQ, REST, ID2, NCK2, HDGF, NOP53, CGGBP1	110	963	19734	2.98069	0.212768	0.117378	0.116475
GOTERM_CC_DIRECT	GO:0032991~protein-containing complex	13	11.1111	0.000307086	IFITM3, KHDRBS1, SMARCC1, HSP90AA1, SET, HSP90AB1, HNRNPU, IKZF1, HIGD1A, ID2, MYH9, STT3B, RNF220	113	684	20887	3.51305	0.071346	0.00822308	0.00767715
UP_SEQ_FEATURE	DOMAIN:RRM 2	6	5.12821	0.000312297	SPEN, RBM15B, SFPQ, HNRNPDL, HNRNPD, TARDBP	113	108	20569	10.1126	0.200896	0.0448459	0.0448459
UP_SEQ_FEATURE	DOMAIN:RRM 1	6	5.12821	0.000312297	SPEN, RBM15B, SFPQ, HNRNPDL, HNRNPD, TARDBP	113	108	20569	10.1126	0.200896	0.0448459	0.0448459
INTERPRO	IPR000504:RRM_dom	8	6.83761	0.000317951	SPEN, RBM3, RBM15B, SFPQ, HNRNPDL, HNRNPD, CIRBP, TARDBP	114	235	20607	6.15364	0.124747	0.106047	0.106047
UP_KW_CELLULAR_COMPONENT	KW-0539~Nucleus	52	44.4444	0.000369448	HSP90AB1, ARPC1B, HNRNPU, ADAR, YBX1, IKZF1, ETS1, RBM3, ELK4, ACTR3, ACTR2, PBRM1, MBNL1, SMARCC1, HSP90AA1, CIRBP, INPP4A, SFPQ, PLEKHO1, CGGBP1, KHDRBS1, SET, MYCBP, CTBP1, CUL3, PDS5A, SAMHD1, PARL, RBM15B, HNRNPDL, ATXN7, PCBP1, DNAJC21, PCBP2, RPS2, MCL1, TSNAX, SPEN, ARPC4, NFKB1, PNRC1, KLF2, REST, CNOT11, STK17A, ID2, HNRNPD, ATM, HDGF, TARDBP, NOP53, RNF220	105	5858	17942	1.51683	0.0102931	0.00517227	0.00498755
GOTERM_BP_DIRECT	GO:0034314~Arp2/3 complex-mediated actin nucleation	4	3.4188	0.000485608	ACTR3, ACTR2, ARPC1B, ARPC4	110	28	19734	25.6286	0.356945	0.117378	0.116475
GOTERM_BP_DIRECT	GO:0042752~regulation of circadian rhythm	5	4.2735	0.000516517	SFPQ, OPN3, ID2, HNRNPD, TARDBP	110	67	19734	13.3881	0.37477	0.117378	0.116475
GOTERM_CC_DIRECT	GO:0016020~membrane	44	37.6068	0.000553555	KHDRBS1, TRAF3IP3, HSP90AB1, CUL3, HNRNPU, ADAR, CTSW, HIGD1A, MT-ND3, PARL, GNAI2, MT-ATP6, TGOLN2, RBM15B, PCBP1, FTH1, PCBP2, RPS2, JAK3, MCL1, ACTR3, ACTR2, HSP90AA1, OPN3, ERAP1, RPL13A, LNPEP, HLA-A, KIAA2013, TGFBR2, EEF1G, RPS26, INPP4A, GNB1, GNAS, MYH9, CD48, RPS20, MT-CO2, CLPTM1L, STT3B, MT-CYB, IL6ST, TRABD2A	113	5048	20887	1.61113	0.124923	0.0133407	0.012455
INTERPRO	IPR035979:RBD_domain_sf	8	6.83761	0.000680867	SPEN, RBM3, RBM15B, SFPQ, HNRNPDL, HNRNPD, CIRBP, TARDBP	114	267	20607	5.41612	0.248272	0.106047	0.106047
INTERPRO	IPR012677:Nucleotide-bd_a/b_plait_sf	8	6.83761	0.000759284	SPEN, RBM3, RBM15B, SFPQ, HNRNPDL, HNRNPD, CIRBP, TARDBP	114	272	20607	5.31656	0.272587	0.106047	0.106047
GOTERM_MF_DIRECT	GO:0003735~structural constituent of ribosome	7	5.98291	0.000870934	RPS26, RPL41, RPL37A, RPL13A, RPS20, RPS2, RPL17	113	191	19304	6.26085	0.226661	0.0513851	0.0501658
KEGG_PATHWAY	hsa05166:Human T-cell leukemia virus 1 infection	8	6.83761	0.000894765	ELK4, PPP3R1, ATM, HLA-A, ETS1, JAK3, NFKB1, TGFBR2	63	223	8840	5.03381	0.16691	0.060844	0.0563702
GOTERM_BP_DIRECT	GO:0006412~translation	7	5.98291	0.000902253	RPS26, RPL41, RPL37A, RPL13A, RPS20, RPS2, RPL17	110	202	19734	6.21683	0.559797	0.160754	0.159516
BIOCARTA	h_salmonellaPathway:How does salmonella hijack a cell	4	3.4188	0.000939496	ACTR3, ACTR2, ARPC1B, ARPC4	27	13	1623	18.4957	0.0982276	0.0516723	0.050263
GOTERM_BP_DIRECT	GO:1900152~negative regulation of nuclear-transcribed mRNA catabolic process, deadenylation-dependent decay	3	2.5641	0.00106108	HNRNPD, HNRNPU, YBX1	110	9	19734	59.8	0.61903	0.160754	0.159516
KEGG_PATHWAY	hsa03010:Ribosome	7	5.98291	0.00124049	RPS26, RPL41, RPL37A, RPL13A, RPS20, RPS2, RPL17	63	172	8840	5.71059	0.223701	0.063265	0.0586131
UP_KW_MOLECULAR_FUNCTION	KW-0678~Repressor	13	11.1111	0.00131417	SPEN, CTBP1, CIRBP, HNRNPU, YBX1, IKZF1, ELK4, SFPQ, REST, HNRNPDL, ID2, HDGF, TARDBP	83	636	11889	2.92788	0.0574597	0.0197126	0.0188364
GOTERM_BP_DIRECT	GO:0045944~positive regulation of transcription by RNA polymerase II	17	14.5299	0.00144163	ACTR3, ACTR2, SMARCC1, HNRNPU, YBX1, ETS1, NFKB1, KLF2, ELK4, SFPQ, REST, PPP3R1, PCBP1, HNRNPD, NCK2, ATM, HDGF	110	1256	19734	2.42818	0.730554	0.162553	0.161301
UP_SEQ_FEATURE	CROSSLNK:Glycyl lysine isopeptide (Lys-Gly) (interchain with G-Cter in ubiquitin)	8	6.83761	0.00149532	IFITM3, SET, BOD1L1, GNAS, RPS20, YBX1, RPS2, MCL1	113	308	20569	4.72796	0.658513	0.17894	0.17894
GOTERM_BP_DIRECT	GO:0042981~regulation of apoptotic process	7	5.98291	0.00160394	HSP90AA1, ATM, TARDBP, ETS1, JAK3, NOP53, MCL1	110	226	19734	5.55664	0.767568	0.162553	0.161301
GOTERM_BP_DIRECT	GO:0070934~CRD-mediated mRNA stabilization	3	2.5641	0.00160943	HNRNPD, HNRNPU, YBX1	110	11	19734	48.9273	0.768726	0.162553	0.161301
GOTERM_CC_DIRECT	GO:0022626~cytosolic ribosome	5	4.2735	0.00164878	RPL37A, RPL13A, RPS20, RPS2, RPL17	113	94	20887	9.83195	0.328126	0.0361233	0.0337251
BIOCARTA	h_cdc42racPathway:Role of PI3K subunit p85 in regulation of Actin Organization and Cell Migration	4	3.4188	0.00178158	ACTR3, ACTR2, ARPC1B, ARPC4	27	16	1623	15.0278	0.17811	0.0653248	0.0635432
UP_KW_BIOLOGICAL_PROCESS	KW-0945~Host-virus interaction	13	11.1111	0.00184236	SPEN, EIF4A2, HSP90AA1, SET, CTBP1, HNRNPU, HLA-A, SAMHD1, RBM15B, PCBP2, GNB1, IL6ST, NOP53	77	690	11450	2.80162	0.08808	0.092118	0.0773792
GOTERM_BP_DIRECT	GO:0010468~regulation of gene expression	7	5.98291	0.00187113	HNRNPDL, PCBP2, HNRNPD, YBX1, TARDBP, CGGBP1, TGFBR2	110	233	19734	5.3897	0.817764	0.170086	0.168776
UP_SEQ_FEATURE	DOMAIN:RRM	7	5.98291	0.00198468	SPEN, RBM3, SFPQ, HNRNPDL, HNRNPD, CIRBP, TARDBP	113	239	20569	5.33132	0.759832	0.203572	0.203572
GOTERM_BP_DIRECT	GO:0006397~mRNA processing	7	5.98291	0.00221642	KHDRBS1, RBM15B, SFPQ, MBNL1, ADAR, YBX1, TARDBP	110	241	19734	5.21079	0.86694	0.183157	0.181746
GOTERM_CC_DIRECT	GO:0035861~site of double-strand break	5	4.2735	0.00222365	ACTR3, ACTR2, ATM, ARPC4, SAMHD1	113	102	20887	9.06082	0.415207	0.0446584	0.0416935
GOTERM_MF_DIRECT	GO:0042802~identical protein binding	21	17.9487	0.00224798	KHDRBS1, HSP90AA1, HSP90AB1, CTBP1, CUL3, HNRNPU, IKZF1, SAMHD1, ETS1, GIMAP7, NFKB1, SRM, REST, FTH1, MYH9, CSK, ATM, TARDBP, IL6ST, NOP53, CGGBP1	113	1737	19304	2.06532	0.48516	0.100917	0.0985227
UP_KW_MOLECULAR_FUNCTION	KW-0689~Ribosomal protein	7	5.98291	0.0023638	RPS26, RPL41, RPL37A, RPL13A, RPS20, RPS2, RPL17	83	197	11889	5.08978	0.101022	0.0265928	0.0254109
GOTERM_MF_DIRECT	GO:0051015~actin filament binding	7	5.98291	0.00260621	ACTR3, ACTR2, ABLIM1, ARPC1B, MYH9, ARPC4, RCSD1	113	237	19304	5.04567	0.536911	0.100917	0.0985227
GOTERM_MF_DIRECT	GO:0003677~DNA binding	16	13.6752	0.00279647	SPEN, TSNAX, KHDRBS1, PBRM1, SET, HNRNPU, ADAR, YBX1, IKZF1, ETS1, KLF2, ELK4, SFPQ, HNRNPDL, ATM, TARDBP	113	1157	19304	2.36241	0.562253	0.100917	0.0985227
KEGG_PATHWAY	hsa05130:Pathogenic Escherichia coli infection	7	5.98291	0.00287309	ACTR3, ACTR2, ARPC1B, NCK2, MYH9, ARPC4, NFKB1	63	203	8840	4.83853	0.443982	0.0934837	0.0866099
BIOCARTA	h_gcrpathway:Corticosteroids and cardioprotection	4	3.4188	0.00298567	HSP90AA1, GNB1, GNAS, NFKB1	27	19	1623	12.655	0.280296	0.0821061	0.0798668
KEGG_PATHWAY	hsa05415:Diabetic cardiomyopathy	7	5.98291	0.00301657	MT-ATP6, MT-CO2, MT-CYB, MT-ND3, NFKB1, MT-ATP8, TGFBR2	63	205	8840	4.79133	0.460067	0.0934837	0.0866099
GOTERM_MF_DIRECT	GO:0003690~double-stranded DNA binding	5	4.2735	0.00338713	HNRNPDL, HNRNPU, YBX1, TARDBP, CGGBP1	113	106	19304	8.05811	0.632452	0.100917	0.0985227
GOTERM_MF_DIRECT	GO:0003682~chromatin binding	10	8.54701	0.00342093	ELK4, SFPQ, PBRM1, REST, SET, CTBP1, HNRNPD, HNRNPU, YBX1, NFKB1	113	523	19304	3.26638	0.63611	0.100917	0.0985227
GOTERM_BP_DIRECT	GO:2000767~positive regulation of cytoplasmic translation	3	2.5641	0.00344876	HNRNPD, HNRNPU, YBX1	110	16	19734	33.6375	0.956732	0.261244	0.259232
KEGG_PATHWAY	hsa05170:Human immunodeficiency virus 1 infection	7	5.98291	0.00364483	PPP3R1, GNB1, ATM, HLA-A, SAMHD1, NFKB1, GNAI2	63	213	8840	4.61137	0.52522	0.0934837	0.0866099
KEGG_PATHWAY	hsa05200:Pathways in cancer	11	9.40171	0.00366603	HSP90AA1, HSP90AB1, CTBP1, GNB1, GNAS, IL6ST, ETS1, JAK3, NFKB1, GNAI2, TGFBR2	63	533	8840	2.89586	0.527276	0.0934837	0.0866099
GOTERM_CC_DIRECT	GO:0005840~ribosome	5	4.2735	0.0037615	RPS26, RPL41, DNAJC21, RPL13A, RPS2	113	118	20887	7.83223	0.596763	0.0697325	0.0651029
BIOCARTA	h_actinYPathway:Y branching of actin filaments	4	3.4188	0.00401153	ACTR3, ACTR2, ARPC1B, ARPC4	27	21	1623	11.4497	0.357351	0.0882537	0.0858468
GOTERM_CC_DIRECT	GO:0017053~transcription repressor complex	4	3.4188	0.00451086	SPEN, REST, CTBP1, HDGF	113	62	20887	11.9252	0.663641	0.074177	0.0692524
GOTERM_CC_DIRECT	GO:1904813~ficolin-1-rich granule lumen	5	4.2735	0.00461683	ACTR2, HSP90AA1, HSP90AB1, CAB39, FTH1	113	125	20887	7.39363	0.672161	0.074177	0.0692524
KEGG_PATHWAY	hsa04218:Cellular senescence	6	5.12821	0.00475091	PPP3R1, ATM, HLA-A, ETS1, NFKB1, TGFBR2	63	157	8840	5.36245	0.621483	0.107687	0.099769
GOTERM_CC_DIRECT	GO:0016363~nuclear matrix	5	4.2735	0.00530215	SFPQ, SMARCC1, PBRM1, ATXN7, HNRNPU	113	130	20887	7.10926	0.722301	0.0798636	0.0745615
GOTERM_BP_DIRECT	GO:0000381~regulation of alternative mRNA splicing, via spliceosome	4	3.4188	0.00534828	KHDRBS1, RBM15B, REST, HNRNPU	110	64	19734	11.2125	0.992362	0.373968	0.371089
GOTERM_CC_DIRECT	GO:0005739~mitochondrion	17	14.5299	0.00570021	HSP90AA1, MYCBP, TRAF3IP3, HSP90AB1, PYCR2, HIGD1A, MT-ND3, NFKB1, MT-ATP8, PARL, GLS, MT-ATP6, UCP2, MT-CO2, MT-CYB, TARDBP, MCL1	113	1485	20887	2.11602	0.747838	0.0808089	0.075444
KEGG_PATHWAY	hsa04714:Thermogenesis	7	5.98291	0.00587549	MT-ATP6, SMARCC1, GNAS, MT-CO2, MT-CYB, MT-ND3, MT-ATP8	63	235	8840	4.17967	0.699448	0.11986	0.111047
UP_KW_BIOLOGICAL_PROCESS	KW-0346~Stress response	5	4.2735	0.00668865	RBM3, HSP90AA1, HSP90AB1, CIRBP, HIGD1A	77	113	11450	6.5797	0.28506	0.14607	0.122699
GOTERM_BP_DIRECT	GO:0071385~cellular response to glucocorticoid stimulus	3	2.5641	0.00770726	REST, HNRNPU, MT-ND3	110	24	19734	22.425	0.999118	0.500422	0.496568
KEGG_PATHWAY	hsa05132:Salmonella infection	7	5.98291	0.00803404	ACTR3, ACTR2, HSP90AA1, HSP90AB1, ARPC1B, ARPC4, NFKB1	63	251	8840	3.91324	0.807096	0.133263	0.123464
KEGG_PATHWAY	hsa04144:Endocytosis	7	5.98291	0.00818567	ACTR3, ACTR2, ARPC1B, ARPC4, HLA-A, SMAP2, TGFBR2	63	252	8840	3.89771	0.813019	0.133263	0.123464
GOTERM_MF_DIRECT	GO:0015078~proton transmembrane transporter activity	3	2.5641	0.00847184	MT-ATP6, UCP2, MT-ATP8	113	24	19304	21.354	0.918719	0.224751	0.219418
KEGG_PATHWAY	hsa04724:Glutamatergic synapse	5	4.2735	0.00849227	PPP3R1, GNB1, GNAS, GNAI2, GLS	63	115	8840	6.10076	0.824448	0.133263	0.123464
GOTERM_CC_DIRECT	GO:0022625~cytosolic large ribosomal subunit	4	3.4188	0.0085301	RPL41, RPL37A, RPL13A, RPL17	113	78	20887	9.47901	0.873127	0.114209	0.106626
GOTERM_CC_DIRECT	GO:0005925~focal adhesion	8	6.83761	0.0090297	ACTR3, ACTR2, ARPC1B, PCBP2, RPL37A, RPL13A, MYH9, RPS2	113	435	20887	3.39937	0.88764	0.114535	0.106931
GOTERM_MF_DIRECT	GO:0003725~double-stranded RNA binding	4	3.4188	0.00914243	MBNL1, HSP90AB1, HNRNPU, ADAR	113	74	19304	9.23415	0.933425	0.224751	0.219418
UP_KW_BIOLOGICAL_PROCESS	KW-0679~Respiratory chain	4	3.4188	0.00993159	MT-CO2, MT-CYB, HIGD1A, MT-ND3	77	67	11450	8.87769	0.3929	0.14607	0.122699
UP_SEQ_FEATURE	DOMAIN:K Homology	3	2.5641	0.0101275	KHDRBS1, PCBP1, PCBP2	113	28	20569	19.5028	0.99933	0.908946	0.908946
GOTERM_BP_DIRECT	GO:0008285~negative regulation of cell population proliferation	8	6.83761	0.0103607	PBRM1, REST, BTG1, CTBP1, FTH1, NCK2, CSK, ETS1	110	434	19734	3.30691	0.999923	0.540349	0.536188
GOTERM_CC_DIRECT	GO:0015934~large ribosomal subunit	2	1.7094	0.0106959	RBM3, RPL13A	113	2	20887	184.841	0.925099	0.128885	0.120329
INTERPRO	IPR034278:RBM3/CIRBP_RRM	2	1.7094	0.0109373	RBM3, CIRBP	114	2	20607	180.763	0.990028	1	1
GOTERM_BP_DIRECT	GO:0033206~meiotic cytokinesis	2	1.7094	0.0110167	ACTR3, ACTR2	110	2	19734	179.4	0.999958	0.540349	0.536188
GOTERM_BP_DIRECT	GO:0039694~viral RNA genome replication	2	1.7094	0.0110167	PCBP1, PCBP2	110	2	19734	179.4	0.999958	0.540349	0.536188
GOTERM_BP_DIRECT	GO:0016344~meiotic chromosome movement towards spindle pole	2	1.7094	0.0110167	ACTR3, ACTR2	110	2	19734	179.4	0.999958	0.540349	0.536188
KEGG_PATHWAY	hsa05012:Parkinson disease	7	5.98291	0.0114757	MT-ATP6, GNAS, MT-CO2, MT-CYB, MT-ND3, MT-ATP8, GNAI2	63	271	8840	3.62444	0.905066	0.167217	0.154921
GOTERM_BP_DIRECT	GO:0010592~positive regulation of lamellipodium assembly	3	2.5641	0.0118889	ACTR3, ACTR2, HSP90AA1	110	30	19734	17.94	0.999981	0.540349	0.536188
GOTERM_BP_DIRECT	GO:0009409~response to cold	3	2.5641	0.0118889	HSP90AA1, UCP2, CIRBP	110	30	19734	17.94	0.999981	0.540349	0.536188
UP_KW_PTM	KW-0488~Methylation	15	12.8205	0.0119362	SPEN, KHDRBS1, SMARCC1, SET, HSP90AB1, HNRNPU, ADAR, RBM3, PTP4A2, SFPQ, HNRNPDL, CNOT11, HNRNPD, MYH9, TARDBP	98	1056	14252	2.06575	0.222885	0.0525191	0.0453574
GOTERM_MF_DIRECT	GO:0044877~protein-containing complex binding	7	5.98291	0.0120657	TSNAX, KHDRBS1, GNB1, NCK2, HNRNPU, ATM, MT-CYB	113	327	19304	3.65695	0.972153	0.257698	0.251583
GOTERM_MF_DIRECT	GO:0008143~poly(A) binding	3	2.5641	0.0122297	KHDRBS1, HNRNPDL, HNRNPU	113	29	19304	17.6723	0.973484	0.257698	0.251583
KEGG_PATHWAY	hsa04926:Relaxin signaling pathway	5	4.2735	0.0129112	GNB1, GNAS, NFKB1, GNAI2, TGFBR2	63	130	8840	5.39683	0.929422	0.175592	0.162681
UP_KW_BIOLOGICAL_PROCESS	KW-0693~Viral RNA replication	2	1.7094	0.0132316	PCBP1, PCBP2	77	2	11450	148.701	0.486239	0.14607	0.122699
BIOCARTA	h_rhoPathway:Rho cell motility signaling pathway	4	3.4188	0.0144839	ACTR3, ACTR2, ARPC1B, ARPC4	27	33	1623	7.2862	0.799086	0.265538	0.258296
KEGG_PATHWAY	hsa05135:Yersinia infection	5	4.2735	0.0157744	ACTR3, ACTR2, ARPC1B, ARPC4, NFKB1	63	138	8840	5.08397	0.960978	0.189292	0.175374
KEGG_PATHWAY	hsa00190:Oxidative phosphorylation	5	4.2735	0.0157744	MT-ATP6, MT-CO2, MT-CYB, MT-ND3, MT-ATP8	63	138	8840	5.08397	0.960978	0.189292	0.175374
GOTERM_CC_DIRECT	GO:0010494~cytoplasmic stress granule	4	3.4188	0.0157919	MBNL1, CIRBP, YBX1, TARDBP	113	98	20887	7.54452	0.978425	0.174645	0.16305
UP_KW_CELLULAR_COMPONENT	KW-0999~Mitochondrion inner membrane	7	5.98291	0.0158159	MT-ATP6, UCP2, MT-CO2, MT-CYB, HIGD1A, MT-ND3, PARL	105	348	17942	3.43716	0.360062	0.147615	0.142343
GOTERM_CC_DIRECT	GO:0005834~heterotrimeric G-protein complex	3	2.5641	0.0159427	GNB1, GNAS, GNAI2	113	36	20887	15.4034	0.979207	0.174645	0.16305
UP_SEQ_FEATURE	REGION:Interaction with NR3C1	2	1.7094	0.0162473	HSP90AA1, HSP90AB1	113	3	20569	121.351	0.999992	1	1
INTERPRO	IPR010912:SPOC_met	2	1.7094	0.0163615	SPEN, RBM15B	114	3	20607	120.509	0.999004	1	1
GOTERM_BP_DIRECT	GO:1990428~miRNA transport	2	1.7094	0.0164799	YBX1, TGFBR2	110	3	19734	119.6	1	0.672376	0.667198
GOTERM_BP_DIRECT	GO:0001666~response to hypoxia	5	4.2735	0.0167955	REST, UCP2, MT-CO2, ATM, MT-CYB	110	177	19734	5.0678	1	0.672376	0.667198
KEGG_PATHWAY	hsa05100:Bacterial invasion of epithelial cells	4	3.4188	0.0172173	ACTR3, ACTR2, ARPC1B, ARPC4	63	78	8840	7.19577	0.971071	0.195129	0.180781
GOTERM_BP_DIRECT	GO:0045893~positive regulation of DNA-templated transcription	10	8.54701	0.0172487	SMARCC1, REST, MYCBP, ATXN7, CTBP1, ID2, HNRNPD, ETS1, NFKB1, KLF2	110	713	19734	2.51613	1	0.672376	0.667198
UP_KW_BIOLOGICAL_PROCESS	KW-0507~mRNA processing	8	6.83761	0.0172717	KHDRBS1, RBM15B, SFPQ, MBNL1, HNRNPU, ADAR, YBX1, TARDBP	77	403	11450	2.95189	0.581522	0.14607	0.122699
UP_KW_BIOLOGICAL_PROCESS	KW-0090~Biological rhythms	5	4.2735	0.0175284	SFPQ, ID2, HNRNPD, HNRNPU, TARDBP	77	150	11450	4.95671	0.586952	0.14607	0.122699
GOTERM_BP_DIRECT	GO:0048255~mRNA stabilization	3	2.5641	0.0177525	CIRBP, HNRNPU, YBX1	110	37	19734	14.5459	1	0.672376	0.667198
GOTERM_CC_DIRECT	GO:0005743~mitochondrial inner membrane	8	6.83761	0.0183714	MT-ATP6, UCP2, MT-CO2, MT-CYB, HIGD1A, MT-ND3, MT-ATP8, PARL	113	501	20887	2.95155	0.988538	0.1925	0.17972
INTERPRO	IPR004088:KH_dom_type_1	3	2.5641	0.0184249	KHDRBS1, PCBP1, PCBP2	114	38	20607	14.2708	0.999587	1	1
INTERPRO	IPR004087:KH_dom	3	2.5641	0.0193522	KHDRBS1, PCBP1, PCBP2	114	39	20607	13.9049	0.999722	1	1
KEGG_PATHWAY	hsa04623:Cytosolic DNA-sensing pathway	4	3.4188	0.0202892	PCBP1, ADAR, SAMHD1, NFKB1	63	83	8840	6.76229	0.984725	0.201699	0.186868
SMART	SM00322:KH	3	2.5641	0.0207211	KHDRBS1, PCBP1, PCBP2	62	39	10692	13.2655	0.759212	0.704517	0.704517
KEGG_PATHWAY	hsa05163:Human cytomegalovirus infection	6	5.12821	0.0207631	PPP3R1, GNB1, GNAS, HLA-A, NFKB1, GNAI2	63	226	8840	3.72524	0.986161	0.201699	0.186868
KEGG_PATHWAY	hsa05208:Chemical carcinogenesis - reactive oxygen species	6	5.12821	0.0207631	MT-ATP6, MT-CO2, MT-CYB, MT-ND3, NFKB1, MT-ATP8	63	226	8840	3.72524	0.986161	0.201699	0.186868
UP_KW_BIOLOGICAL_PROCESS	KW-0805~Transcription regulation	25	21.3675	0.0208851	KHDRBS1, MYCBP, CTBP1, HNRNPU, IKZF1, YBX1, ETS1, ELK4, RBM15B, HNRNPDL, ATXN7, SPEN, SMARCC1, PBRM1, PNRC1, NFKB1, KLF2, SFPQ, REST, CNOT11, ID2, HNRNPD, HDGF, TARDBP, CGGBP1	77	2414	11450	1.53999	0.651917	0.149179	0.125311
GOTERM_BP_DIRECT	GO:0032435~negative regulation of proteasomal ubiquitin-dependent protein catabolic process	3	2.5641	0.0215479	SMARCC1, HSP90AB1, NOP53	110	41	19734	13.1268	1	0.737742	0.732061
UP_SEQ_FEATURE	REGION:Interaction with NR1D1	2	1.7094	0.0216047	HSP90AA1, HSP90AB1	113	4	20569	91.0133	1	1	1
UP_SEQ_FEATURE	DOMAIN:SPOC	2	1.7094	0.0216047	SPEN, RBM15B	113	4	20569	91.0133	1	1	1
UP_SEQ_FEATURE	MOTIF:TPR repeat-binding	2	1.7094	0.0216047	HSP90AA1, HSP90AB1	113	4	20569	91.0133	1	1	1
INTERPRO	IPR019805:Heat_shock_protein_90_CS	2	1.7094	0.0217561	HSP90AA1, HSP90AB1	114	4	20607	90.3816	0.999901	1	1
GOTERM_BP_DIRECT	GO:1902949~positive regulation of tau-protein kinase activity	2	1.7094	0.0219131	HSP90AA1, HSP90AB1	110	4	19734	89.7	1	0.737742	0.732061
GOTERM_BP_DIRECT	GO:1905323~telomerase holoenzyme complex assembly	2	1.7094	0.0219131	HSP90AA1, HSP90AB1	110	4	19734	89.7	1	0.737742	0.732061
GOTERM_MF_DIRECT	GO:0061629~RNA polymerase II-specific DNA-binding transcription factor binding	5	4.2735	0.0223837	SPEN, REST, CTBP1, ID2, ETS1	113	184	19304	4.64217	0.998742	0.415683	0.405819
GOTERM_MF_DIRECT	GO:0051020~GTPase binding	3	2.5641	0.0225455	HSP90AA1, GNB1, YBX1	113	40	19304	12.8124	0.998802	0.415683	0.405819
GOTERM_CC_DIRECT	GO:0008180~COP9 signalosome	3	2.5641	0.0242842	HSP90AB1, MYH9, CSK	113	45	20887	12.3227	0.997327	0.23681	0.221088
GOTERM_CC_DIRECT	GO:0034774~secretory granule lumen	4	3.4188	0.0245654	HSP90AA1, HSP90AB1, CAB39, NFKB1	113	116	20887	6.37382	0.997507	0.23681	0.221088
GOTERM_BP_DIRECT	GO:0045429~positive regulation of nitric oxide biosynthetic process	3	2.5641	0.0245948	HSP90AA1, HSP90AB1, KLF2	110	44	19734	12.2318	1	0.743534	0.737808
INTERPRO	IPR020568:Ribosomal_Su5_D2-typ_SF	3	2.5641	0.0253121	HSP90AA1, HSP90AB1, RPS2	114	45	20607	12.0509	0.999978	1	1
GOTERM_BP_DIRECT	GO:0008380~RNA splicing	5	4.2735	0.0253902	RBM15B, SFPQ, MBNL1, YBX1, TARDBP	110	201	19734	4.46269	1	0.743534	0.737808
GOTERM_BP_DIRECT	GO:0034097~response to cytokine	3	2.5641	0.026718	IL6ST, NFKB1, MCL1	110	46	19734	11.7	1	0.743534	0.737808
GOTERM_BP_DIRECT	GO:0045663~positive regulation of myoblast differentiation	3	2.5641	0.026718	SMARCC1, PBRM1, BTG1	110	46	19734	11.7	1	0.743534	0.737808
UP_KW_CELLULAR_COMPONENT	KW-0496~Mitochondrion	15	12.8205	0.0267187	HSP90AA1, MYCBP, TRAF3IP3, PYCR2, HIGD1A, MT-ND3, MT-ATP8, PARL, GLS, MT-ATP6, UCP2, MT-CO2, MT-CYB, TARDBP, MCL1	105	1371	17942	1.86954	0.531538	0.187031	0.180351
GOTERM_MF_DIRECT	GO:0005200~structural constituent of cytoskeleton	4	3.4188	0.0268332	ACTR3, ACTR2, ARPC1B, ARPC4	113	111	19304	6.1561	0.999672	0.465636	0.454587
UP_KW_MOLECULAR_FUNCTION	KW-0010~Activator	11	9.40171	0.0269416	ELK4, SPEN, SFPQ, HNRNPDL, CIRBP, HNRNPU, IKZF1, YBX1, NFKB1, KLF2, PNRC1	83	725	11889	2.17331	0.707416	0.242475	0.231698
INTERPRO	IPR016194:SPOC-like_C_dom_sf	2	1.7094	0.0271214	SPEN, RBM15B	114	5	20607	72.3053	0.99999	1	1
GOTERM_BP_DIRECT	GO:0010558~negative regulation of macromolecule biosynthetic process	2	1.7094	0.0273166	SPEN, RBM15B	110	5	19734	71.76	1	0.743534	0.737808
GOTERM_BP_DIRECT	GO:0051653~spindle localization	2	1.7094	0.0273166	ACTR3, ACTR2	110	5	19734	71.76	1	0.743534	0.737808
GOTERM_BP_DIRECT	GO:0006974~DNA damage response	6	5.12821	0.0278109	HMCES, BOD1L1, ATM, SAMHD1, NOP53, MCL1	110	307	19734	3.50619	1	0.743534	0.737808
UP_KW_BIOLOGICAL_PROCESS	KW-0804~Transcription	25	21.3675	0.0286774	KHDRBS1, MYCBP, CTBP1, HNRNPU, IKZF1, YBX1, ETS1, ELK4, RBM15B, HNRNPDL, ATXN7, SPEN, SMARCC1, PBRM1, PNRC1, NFKB1, KLF2, SFPQ, REST, CNOT11, ID2, HNRNPD, HDGF, TARDBP, CGGBP1	77	2483	11450	1.49719	0.76656	0.179234	0.150556
GOTERM_MF_DIRECT	GO:0030235~nitric-oxide synthase regulator activity	2	1.7094	0.0286778	HSP90AA1, HSP90AB1	113	5	19304	68.3327	0.999813	0.469997	0.458845
INTERPRO	IPR036612:KH_dom_type_1_sf	3	2.5641	0.0296461	KHDRBS1, PCBP1, PCBP2	114	49	20607	11.0671	0.999997	1	1
KEGG_PATHWAY	hsa05131:Shigellosis	6	5.12821	0.0299767	ACTR3, ACTR2, ARPC1B, ATM, ARPC4, NFKB1	63	249	8840	3.38114	0.997988	0.265238	0.245735
UP_SEQ_FEATURE	CROSSLNK:Glycyl lysine isopeptide (Lys-Gly) (interchain with G-Cter in SUMO); alternate	3	2.5641	0.0303767	ATXN7, ADAR, HDGF	113	50	20569	10.9216	1	1	1
KEGG_PATHWAY	hsa04530:Tight junction	5	4.2735	0.03107	ACTR3, ACTR2, ARPC1B, MYH9, ARPC4	63	170	8840	4.12698	0.998402	0.265238	0.245735
KEGG_PATHWAY	hsa04666:Fc gamma R-mediated phagocytosis	4	3.4188	0.0312045	ACTR3, ACTR2, ARPC1B, ARPC4	63	98	8840	5.72724	0.998446	0.265238	0.245735
GOTERM_CC_DIRECT	GO:0070937~CRD-mediated mRNA stability complex	2	1.7094	0.0317486	HNRNPU, YBX1	113	6	20887	61.6136	0.99958	0.283397	0.264582
GOTERM_CC_DIRECT	GO:0022627~cytosolic small ribosomal subunit	3	2.5641	0.0317499	RPS26, RPS20, RPS2	113	52	20887	10.6639	0.99958	0.283397	0.264582
INTERPRO	IPR012921:SPOC_C	2	1.7094	0.0324576	SPEN, RBM15B	114	6	20607	60.2544	0.999999	1	1
GOTERM_BP_DIRECT	GO:0008356~asymmetric cell division	2	1.7094	0.0326906	ACTR3, ACTR2	110	6	19734	59.8	1	0.849021	0.842483
GOTERM_MF_DIRECT	GO:0001222~transcription corepressor binding	3	2.5641	0.0328681	CTBP1, HDGF, ETS1	113	49	19304	10.4591	0.999948	0.51032	0.498211
GOTERM_BP_DIRECT	GO:0001701~in utero embryonic development	5	4.2735	0.0342599	MBNL1, MYH9, YBX1, KLF2, TGFBR2	110	221	19734	4.05882	1	0.861709	0.855073
KEGG_PATHWAY	hsa04216:Ferroptosis	3	2.5641	0.0348198	PCBP1, FTH1, PCBP2	63	42	8840	10.0227	0.999275	0.277811	0.257384
KEGG_PATHWAY	hsa05142:Chagas disease	4	3.4188	0.0354073	GNAS, NFKB1, GNAI2, TGFBR2	63	103	8840	5.44922	0.99936	0.277811	0.257384
GOTERM_BP_DIRECT	GO:2000045~regulation of G1/S transition of mitotic cell cycle	3	2.5641	0.0359067	SMARCC1, PBRM1, ID2	110	54	19734	9.96667	1	0.861709	0.855073
UP_SEQ_FEATURE	DOMAIN:Histidine kinase/HSP90-like ATPase	2	1.7094	0.037504	HSP90AA1, HSP90AB1	113	7	20569	52.0076	1	1	1
UP_SEQ_FEATURE	DOMAIN:ERAP1-like C-terminal	2	1.7094	0.037504	ERAP1, LNPEP	113	7	20569	52.0076	1	1	1
GOTERM_MF_DIRECT	GO:0019904~protein domain specific binding	5	4.2735	0.0377121	KHDRBS1, PPP3R1, CTBP1, MYH9, IKZF1	113	217	19304	3.93622	0.999988	0.510994	0.498869
GOTERM_BP_DIRECT	GO:0071870~cellular response to catecholamine stimulus	2	1.7094	0.0380351	GNB1, GNAS	110	7	19734	51.2571	1	0.861709	0.855073
UP_KW_BIOLOGICAL_PROCESS	KW-0249~Electron transport	4	3.4188	0.0382741	MT-CO2, MT-CYB, HIGD1A, MT-ND3	77	112	11450	5.31076	0.857909	0.212634	0.178612
GOTERM_BP_DIRECT	GO:0045892~negative regulation of DNA-templated transcription	8	6.83761	0.0396245	SPEN, KHDRBS1, SFPQ, REST, SET, CTBP1, ID2, IKZF1	110	573	19734	2.50471	1	0.861709	0.855073
GOTERM_MF_DIRECT	GO:0005138~interleukin-6 receptor binding	2	1.7094	0.0399193	ERAP1, IL6ST	113	7	19304	48.8091	0.999994	0.510994	0.498869
GOTERM_MF_DIRECT	GO:0030911~TPR domain binding	2	1.7094	0.0399193	HSP90AA1, HSP90AB1	113	7	19304	48.8091	0.999994	0.510994	0.498869
GOTERM_MF_DIRECT	GO:0042277~peptide binding	3	2.5641	0.0405878	HSP90AB1, ERAP1, LNPEP	113	55	19304	9.3181	0.999995	0.510994	0.498869
GOTERM_MF_DIRECT	GO:0042826~histone deacetylase binding	4	3.4188	0.0415724	SFPQ, HSP90AA1, HSP90AB1, HNRNPD	113	132	19304	5.17672	0.999996	0.510994	0.498869
GOTERM_BP_DIRECT	GO:0006338~chromatin remodeling	6	5.12821	0.0416879	SFPQ, SMARCC1, PBRM1, REST, ATM, HDGF	110	343	19734	3.13819	1	0.861709	0.855073
GOTERM_BP_DIRECT	GO:1902600~proton transmembrane transport	4	3.4188	0.0418376	MT-ATP6, UCP2, MT-CO2, MT-ATP8	110	139	19734	5.16259	1	0.861709	0.855073
GOTERM_BP_DIRECT	GO:0006986~response to unfolded protein	3	2.5641	0.0421796	HSP90AA1, HSP90AB1, STT3B	110	59	19734	9.12203	1	0.861709	0.855073
GOTERM_CC_DIRECT	GO:0014069~postsynaptic density	5	4.2735	0.0424774	INPP4A, PCBP1, PCBP2, HNRNPD, NCK2	113	244	20887	3.78772	0.999971	0.365609	0.341336
PIR_SUPERFAMILY	PIRSF002583:Hsp90	2	1.7094	0.0425792	HSP90AA1, HSP90AB1	15	6	1940	43.1111	0.479354	0.638688	0.638688
INTERPRO	IPR024571:ERAP1-like_C_dom	2	1.7094	0.043043	ERAP1, LNPEP	114	8	20607	45.1908	1	1	1
GOTERM_BP_DIRECT	GO:0045955~negative regulation of calcium ion-dependent exocytosis	2	1.7094	0.0433504	REST, GNAI2	110	8	19734	44.85	1	0.861709	0.855073
GOTERM_BP_DIRECT	GO:0009048~dosage compensation by inactivation of X chromosome	2	1.7094	0.0433504	RBM15B, HNRNPU	110	8	19734	44.85	1	0.861709	0.855073
GOTERM_BP_DIRECT	GO:0045597~positive regulation of cell differentiation	3	2.5641	0.0434801	SMARCC1, PBRM1, HSP90AB1	110	60	19734	8.97	1	0.861709	0.855073
GOTERM_BP_DIRECT	GO:0051726~regulation of cell cycle	5	4.2735	0.0436068	HSP90AB1, CTBP1, ATM, TARDBP, NOP53	110	239	19734	3.75314	1	0.861709	0.855073
KEGG_PATHWAY	hsa05014:Amyotrophic lateral sclerosis	7	5.98291	0.0448143	MT-ATP6, PPP3R1, MT-CO2, MT-CYB, TARDBP, MT-ND3, MT-ATP8	63	371	8840	2.6475	0.999913	0.313506	0.290454
KEGG_PATHWAY	hsa05020:Prion disease	6	5.12821	0.0448275	MT-ATP6, PPP3R1, MT-CO2, MT-CYB, MT-ND3, MT-ATP8	63	278	8840	3.02843	0.999914	0.313506	0.290454
GOTERM_MF_DIRECT	GO:0045296~cadherin binding	6	5.12821	0.0456765	EEF1G, RPS26, HSP90AB1, PCBP1, MYH9, RPS2	113	335	19304	3.05968	0.999999	0.538983	0.526194
GOTERM_CC_DIRECT	GO:0000785~chromatin	12	10.2564	0.0459111	ELK4, SFPQ, SMARCC1, PBRM1, SET, HNRNPDL, HNRNPD, TARDBP, PDS5A, ETS1, NFKB1, KLF2	113	1156	20887	1.91876	0.999988	0.379545	0.354347
KEGG_PATHWAY	hsa05202:Transcriptional misregulation in cancer	5	4.2735	0.0460791	ELK4, ID2, ATM, NFKB1, TGFBR2	63	193	8840	3.63517	0.999934	0.313506	0.290454
KEGG_PATHWAY	hsa05030:Cocaine addiction	3	2.5641	0.0461038	GNAS, NFKB1, GNAI2	63	49	8840	8.59086	0.999934	0.313506	0.290454
BIOCARTA	h_cskPathway:Activation of Csk by cAMP-dependent Protein Kinase Inhibits Signaling through the T Cell Receptor	3	2.5641	0.0468453	GNB1, GNAS, CSK	27	22	1623	8.19697	0.994895	0.736141	0.716064
UP_KW_MOLECULAR_FUNCTION	KW-0238~DNA-binding	22	18.8034	0.0469053	SPEN, TSNAX, PBRM1, SET, HNRNPU, ADAR, YBX1, IKZF1, ETS1, NFKB1, KLF2, ELK4, SFPQ, HNRNPDL, PCBP1, HMCES, PCBP2, HNRNPD, ATM, HDGF, TARDBP, CGGBP1	83	2110	11889	1.49351	0.884888	0.312586	0.298693
GOTERM_CC_DIRECT	GO:0044294~dendritic growth cone	2	1.7094	0.0472463	HSP90AA1, HSP90AB1	113	9	20887	41.0757	0.999991	0.379545	0.354347
UP_SEQ_FEATURE	DOMAIN:Peptidase M1 membrane alanine aminopeptidase	2	1.7094	0.047961	ERAP1, LNPEP	113	9	20569	40.4503	1	1	1
UP_SEQ_FEATURE	DOMAIN:Aminopeptidase N-like N-terminal	2	1.7094	0.047961	ERAP1, LNPEP	113	9	20569	40.4503	1	1	1
KEGG_PATHWAY	hsa05167:Kaposi sarcoma-associated herpesvirus infection	5	4.2735	0.0482901	PPP3R1, GNB1, HLA-A, IL6ST, NFKB1	63	196	8840	3.57953	0.999959	0.31778	0.294414
INTERPRO	IPR020575:Hsp90_N	2	1.7094	0.0482926	HSP90AA1, HSP90AB1	114	9	20607	40.1696	1	1	1
INTERPRO	IPR034016:M1_APN-typ	2	1.7094	0.0482926	ERAP1, LNPEP	114	9	20607	40.1696	1	1	1
UP_KW_MOLECULAR_FUNCTION	KW-0009~Actin-binding	6	5.12821	0.0486244	ACTR3, ACTR2, ABLIM1, ARPC1B, MYH9, ARPC4	83	288	11889	2.98419	0.89387	0.312586	0.298693
GOTERM_MF_DIRECT	GO:1990782~protein tyrosine kinase binding	3	2.5641	0.0489158	KHDRBS1, HSP90AA1, CSK	113	61	19304	8.40157	1	0.555007	0.541837
UP_KW_DISEASE	KW-0122~Cardiomyopathy	4	3.4188	0.0489401	MT-ATP6, MT-CYB, MT-ATP8, RNF220	39	105	4817	4.70525	0.799251	0.783627	0.783627
GOTERM_CC_DIRECT	GO:0005819~spindle	4	3.4188	0.0492892	MZT2B, MAP7D1, MYH9, ATM	113	153	20887	4.83244	0.999995	0.383184	0.357744
KEGG_PATHWAY	hsa05022:Pathways of neurodegeneration - multiple diseases	8	6.83761	0.0511574	MT-ATP6, PPP3R1, MT-CO2, MT-CYB, TARDBP, MT-ND3, NFKB1, MT-ATP8	63	483	8840	2.3241	0.999978	0.326128	0.302148
UP_KW_LIGAND	KW-0547~Nucleotide-binding	17	14.5299	0.0511642	ACTR3, EIF4A2, ACTR2, HSP90AA1, HSP90AB1, HNRNPU, SAMHD1, GIMAP7, TGFBR2, GNAI2, STK17A, GNAS, MYH9, CSK, ATM, HDGF, JAK3	41	1879	6947	1.53298	0.568424	0.771447	0.771447
INTERPRO	IPR036388:WH-like_DNA-bd_sf	5	4.2735	0.0513115	ELK4, SMARCC1, CUL3, ADAR, ETS1	114	254	20607	3.55833	1	1	1
GOTERM_CC_DIRECT	GO:0048471~perinuclear region of cytoplasm	9	7.69231	0.0521894	EIF4A2, TSNAX, IFITM3, HSP90AA1, SET, HSP90AB1, GNAS, LNPEP, SYNC	113	761	20887	2.18603	0.999998	0.393051	0.366956
GOTERM_BP_DIRECT	GO:0042776~proton motive force-driven mitochondrial ATP synthesis	3	2.5641	0.0529888	MT-ATP6, MT-ND3, MT-ATP8	110	67	19734	8.03284	1	0.960577	0.95318
GOTERM_BP_DIRECT	GO:0030422~siRNA processing	2	1.7094	0.0538937	TSNAX, ADAR	110	10	19734	35.88	1	0.960577	0.95318
GOTERM_BP_DIRECT	GO:0051248~negative regulation of protein metabolic process	2	1.7094	0.0538937	HSP90AB1, NFKB1	110	10	19734	35.88	1	0.960577	0.95318
GOTERM_BP_DIRECT	GO:0007191~adenylate cyclase-activating dopamine receptor signaling pathway	2	1.7094	0.0538937	GNB1, GNAS	110	10	19734	35.88	1	0.960577	0.95318
GOTERM_BP_DIRECT	GO:0019885~antigen processing and presentation of endogenous peptide antigen via MHC class I	2	1.7094	0.0538937	ERAP1, HLA-A	110	10	19734	35.88	1	0.960577	0.95318
GOTERM_CC_DIRECT	GO:0045202~synapse	7	5.98291	0.0546094	RPS26, GNB1, RPL13A, RPS20, YBX1, GNAI2, GLS	113	505	20887	2.56215	0.999999	0.398814	0.372337
KEGG_PATHWAY	hsa05010:Alzheimer disease	7	5.98291	0.0552978	MT-ATP6, PPP3R1, MT-CO2, MT-CYB, MT-ND3, NFKB1, MT-ATP8	63	391	8840	2.51208	0.999991	0.341841	0.316706
UP_KW_BIOLOGICAL_PROCESS	KW-0508~mRNA splicing	6	5.12821	0.0567125	RBM15B, SFPQ, MBNL1, HNRNPU, YBX1, TARDBP	77	313	11450	2.8505	0.946024	0.245416	0.206149
UP_SEQ_FEATURE	REGION:Disordered	84	71.7949	0.0572405	TRIR, IFITM3, EIF4A2, EIF4E3, TRAF3IP3, HSP90AB1, ARPC1B, HNRNPU, ADAR, CTSW, YBX1, IKZF1, RCSD1, ETS1, GLS, RBM3, ELK4, FTH1, HMCES, NCK2, CDV3, PBRM1, SMARCC1, HSP90AA1, CIRBP, RPL13A, HLA-A, EEF1G, MZT2B, SFPQ, MAP7D1, PPDPF, MYH9, PLEKHO1, PTPRCAP, SYNC, IL6ST, CGGBP1, TRABD2A, KHDRBS1, SET, MYCBP, CTBP1, CUL3, BOD1L1, PDS5A, SAMHD1, FAM117B, SRM, GNAI2, TGOLN2, ABLIM1, RBM15B, HNRNPDL, ATXN7…	113	13727	20569	1.11388	1	1	1
GOTERM_BP_DIRECT	GO:0006468~protein phosphorylation	6	5.12821	0.0575378	STK17A, CTBP1, CSK, ATM, JAK3, TGFBR2	110	376	19734	2.86277	1	0.995223	0.987559
INTERPRO	IPR037196:HSP90_C	2	1.7094	0.0587062	HSP90AA1, HSP90AB1	114	11	20607	32.866	1	1	1
GOTERM_BP_DIRECT	GO:2000271~positive regulation of fibroblast apoptotic process	2	1.7094	0.0591222	BTG1, STK17A	110	11	19734	32.6182	1	0.995223	0.987559
GOTERM_BP_DIRECT	GO:0048711~positive regulation of astrocyte differentiation	2	1.7094	0.0591222	ID2, IL6ST	110	11	19734	32.6182	1	0.995223	0.987559
GOTERM_MF_DIRECT	GO:0035591~signaling adaptor activity	3	2.5641	0.0608801	KHDRBS1, NCK2, CSK	113	69	19304	7.42747	1	0.635163	0.620091
SMART	SM00387:HATPase_c	2	1.7094	0.061025	HSP90AA1, HSP90AB1	62	11	10692	31.3548	0.986181	1	1
UP_KW_DISEASE	KW-0948~Aicardi-Goutieres syndrome	2	1.7094	0.061438	ADAR, SAMHD1	39	8	4817	30.8782	0.868533	0.783627	0.783627
UP_KW_BIOLOGICAL_PROCESS	KW-0051~Antiviral defense	4	3.4188	0.0616102	IFITM3, PCBP2, ADAR, SAMHD1	77	136	11450	4.37357	0.958393	0.245416	0.206149
UP_KW_BIOLOGICAL_PROCESS	KW-0810~Translation regulation	4	3.4188	0.0616102	EIF4E3, CNOT11, NCK2, RPL13A	77	136	11450	4.37357	0.958393	0.245416	0.206149
GOTERM_BP_DIRECT	GO:0045766~positive regulation of angiogenesis	4	3.4188	0.0616539	BTG1, ERAP1, ETS1, TGFBR2	110	163	19734	4.40245	1	1	0.993392
GOTERM_MF_DIRECT	GO:0034046~poly(G) binding	2	1.7094	0.062017	HNRNPDL, HNRNPU	113	11	19304	31.0603	1	0.635163	0.620091
GOTERM_MF_DIRECT	GO:0097110~scaffold protein binding	3	2.5641	0.0624398	HSP90AA1, NCK2, IL6ST	113	70	19304	7.32137	1	0.635163	0.620091
KEGG_PATHWAY	hsa05207:Chemical carcinogenesis - receptor activation	5	4.2735	0.063643	HSP90AA1, HSP90AB1, GNAS, NFKB1, GNAI2	63	215	8840	3.2632	0.999999	0.381858	0.35378
UP_KW_BIOLOGICAL_PROCESS	KW-0399~Innate immunity	7	5.98291	0.063808	IFITM3, SFPQ, PCBP2, ADAR, HLA-A, SAMHD1, JAK3	77	427	11450	2.43773	0.962996	0.245416	0.206149
INTERPRO	IPR001930:Peptidase_M1	2	1.7094	0.0638707	ERAP1, LNPEP	114	12	20607	30.1272	1	1	1
INTERPRO	IPR045357:Aminopeptidase_N-like_N	2	1.7094	0.0638707	ERAP1, LNPEP	114	12	20607	30.1272	1	1	1
GOTERM_BP_DIRECT	GO:0035455~response to interferon-alpha	2	1.7094	0.064322	IFITM3, ADAR	110	12	19734	29.9	1	1	0.993392
GOTERM_CC_DIRECT	GO:0015629~actin cytoskeleton	5	4.2735	0.0647076	ACTR3, ACTR2, ABLIM1, ARPC1B, MYH9	113	281	20887	3.28898	1	0.458662	0.428212
KEGG_PATHWAY	hsa05016:Huntington disease	6	5.12821	0.0663227	MT-ATP6, REST, MT-CO2, MT-CYB, MT-ND3, MT-ATP8	63	311	8840	2.70709	0.999999	0.386566	0.358142
GOTERM_CC_DIRECT	GO:0016281~eukaryotic translation initiation factor 4F complex	2	1.7094	0.067528	EIF4A2, EIF4E3	113	13	20887	28.437	1	0.464978	0.434108
INTERPRO	IPR014782:Peptidase_M1_dom	2	1.7094	0.069007	ERAP1, LNPEP	114	13	20607	27.8097	1	1	1
GOTERM_BP_DIRECT	GO:0043922~negative regulation by host of viral transcription	2	1.7094	0.0694933	REST, TARDBP	110	13	19734	27.6	1	1	0.993392
KEGG_PATHWAY	hsa04210:Apoptosis	4	3.4188	0.0699311	CTSW, ATM, NFKB1, MCL1	63	136	8840	4.12698	1	0.396276	0.367138
GOTERM_MF_DIRECT	GO:0004175~endopeptidase activity	3	2.5641	0.0704375	ERAP1, PARL, TRABD2A	113	75	19304	6.83327	1	0.692636	0.6762
UP_SEQ_FEATURE	DOMAIN:KH 3	2	1.7094	0.0736135	PCBP1, PCBP2	113	14	20569	26.0038	1	1	1
KEGG_PATHWAY	hsa04915:Estrogen signaling pathway	4	3.4188	0.0736228	HSP90AA1, HSP90AB1, GNAS, GNAI2	63	139	8840	4.03791	1	0.404775	0.375012
GOTERM_BP_DIRECT	GO:0045727~positive regulation of translation	3	2.5641	0.0739261	RBM3, HNRNPD, CIRBP	110	81	19734	6.64444	1	1	0.993392
INTERPRO	IPR001404:Hsp90_fam	2	1.7094	0.0741154	HSP90AA1, HSP90AB1	114	14	20607	25.8233	1	1	1
INTERPRO	IPR003594:HATPase_C	2	1.7094	0.0741154	HSP90AA1, HSP90AB1	114	14	20607	25.8233	1	1	1
INTERPRO	IPR027268:Peptidase_M4/M1_CTD_sf	2	1.7094	0.0741154	ERAP1, LNPEP	114	14	20607	25.8233	1	1	1
INTERPRO	IPR042097:Aminopeptidase_N-like_N_sf	2	1.7094	0.0741154	ERAP1, LNPEP	114	14	20607	25.8233	1	1	1
UP_KW_PTM	KW-0702~S-nitrosylation	3	2.5641	0.0742963	HSP90AA1, HSP90AB1, NFKB1	98	66	14252	6.61039	0.802343	0.247661	0.213889
GOTERM_BP_DIRECT	GO:1990845~adaptive thermogenesis	2	1.7094	0.0746363	UCP2, HNRNPU	110	14	19734	25.6286	1	1	0.993392
UP_KW_DISEASE	KW-1274~Primary mitochondrial disease	5	4.2735	0.0751062	MT-ATP6, MT-CO2, MT-CYB, MT-ND3, MT-ATP8	39	204	4817	3.02728	0.917787	0.783627	0.783627
KEGG_PATHWAY	hsa05418:Fluid shear stress and atherosclerosis	4	3.4188	0.076132	HSP90AA1, HSP90AB1, NFKB1, KLF2	63	141	8840	3.98064	1	0.404775	0.375012
GOTERM_BP_DIRECT	GO:0045087~innate immune response	7	5.98291	0.0766792	SFPQ, PCBP2, ADAR, HLA-A, SAMHD1, JAK3, NFKB1	110	536	19734	2.34291	1	1	0.993392
UP_SEQ_FEATURE	CROSSLNK:Glycyl lysine isopeptide (Lys-Gly) (interchain with G-Cter in SUMO1); alternate	4	3.4188	0.077329	PBRM1, HNRNPU, ADAR, RPS2	113	182	20569	4.00058	1	1	1
KEGG_PATHWAY	hsa04810:Regulation of actin cytoskeleton	5	4.2735	0.0773835	ACTR3, ACTR2, ARPC1B, MYH9, ARPC4	63	230	8840	3.05038	1	0.404775	0.375012
BIOCARTA	h_antisensePathway:RNA polymerase III transcription	2	1.7094	0.0776658	SFPQ, ADAR	27	5	1623	24.0444	0.999863	1	0.981651
UP_KW_CELLULAR_COMPONENT	KW-0138~CF(0)	2	1.7094	0.0781899	MT-ATP6, MT-ATP8	105	14	17942	24.4109	0.89768	0.437864	0.422226
UP_KW_PTM	KW-0013~ADP-ribosylation	4	3.4188	0.0788012	CTBP1, GNAS, HNRNPU, GNAI2	98	147	14252	3.95724	0.821589	0.247661	0.213889
GOTERM_BP_DIRECT	GO:0007213~G protein-coupled acetylcholine receptor signaling pathway	2	1.7094	0.0797512	GNB1, GNAI2	110	15	19734	23.92	1	1	0.993392
KEGG_PATHWAY	hsa04550:Signaling pathways regulating pluripotency of stem cells	4	3.4188	0.0799665	REST, ID2, IL6ST, JAK3	63	144	8840	3.89771	1	0.407829	0.377842
GOTERM_BP_DIRECT	GO:0030154~cell differentiation	8	6.83761	0.0816776	ELK4, TSNAX, ID2, PPDPF, ETS1, JAK3, TGFBR2, MCL1	110	678	19734	2.11681	1	1	0.993392
GOTERM_CC_DIRECT	GO:0016607~nuclear speck	6	5.12821	0.0830611	RBM15B, SFPQ, STK17A, PCBP1, HNRNPU, TARDBP	113	432	20887	2.56723	1	0.556048	0.519132
UP_SEQ_FEATURE	DOMAIN:G-alpha	2	1.7094	0.0836816	GNAS, GNAI2	113	16	20569	22.7533	1	1	1
KEGG_PATHWAY	hsa04924:Renin secretion	3	2.5641	0.0842133	PPP3R1, GNAS, GNAI2	63	69	8840	6.10076	1	0.419013	0.388203
INTERPRO	IPR011025:GproteinA_insert	2	1.7094	0.084249	GNAS, GNAI2	114	16	20607	22.5954	1	1	1
INTERPRO	IPR001019:Gprotein_alpha_su	2	1.7094	0.084249	GNAS, GNAI2	114	16	20607	22.5954	1	1	1
GOTERM_MF_DIRECT	GO:0003779~actin binding	5	4.2735	0.0860161	ABLIM1, NCK2, MYH9, HNRNPU, HDGF	113	287	19304	2.97616	1	0.81854	0.799117
SMART	SM00275:G_alpha	2	1.7094	0.0875382	GNAS, GNAI2	62	16	10692	21.5565	0.998029	1	1
UP_KW_DOMAIN	KW-0677~Repeat	30	25.641	0.0895646	ARPC1B, ADAR, IKZF1, PDS5A, GLS, TGOLN2, RBM15B, ABLIM1, PPP3R1, HNRNPDL, PCBP1, DNAJC21, PCBP2, UCP2, NCK2, RPS2, JAK3, SPEN, PBRM1, MBNL1, ANKRD44, NFKB1, KLF2, SFPQ, REST, GNB1, HNRNPD, CD48, TARDBP, IL6ST	68	5064	14597	1.27169	0.777163	0.726125	0.726125
GOTERM_BP_DIRECT	GO:0055093~response to hyperoxia	2	1.7094	0.0898969	MT-ATP6, MT-CYB	110	17	19734	21.1059	1	1	0.993392
GOTERM_BP_DIRECT	GO:0016446~somatic hypermutation of immunoglobulin genes	2	1.7094	0.0898969	HMCES, SAMHD1	110	17	19734	21.1059	1	1	0.993392
UP_KW_DOMAIN	KW-0727~SH2 domain	3	2.5641	0.0907656	NCK2, CSK, JAK3	68	110	14597	5.85441	0.781821	0.726125	0.726125
GOTERM_CC_DIRECT	GO:0016586~RSC-type complex	2	1.7094	0.0922793	SMARCC1, PBRM1	113	18	20887	20.5379	1	0.601063	0.561158
BIOCARTA	h_gsPathway:Activation of cAMP-dependent protein kinase, PKA	2	1.7094	0.0924869	GNB1, GNAS	27	6	1623	20.037	0.999977	1	0.981651
GOTERM_BP_DIRECT	GO:0010629~negative regulation of gene expression	5	4.2735	0.0929448	REST, ID2, HNRNPD, TARDBP, NFKB1	110	310	19734	2.89355	1	1	0.993392
GOTERM_MF_DIRECT	GO:0004129~cytochrome-c oxidase activity	2	1.7094	0.0942218	MT-CO2, MT-CYB	113	17	19304	20.0979	1	0.844086	0.824057
GOTERM_MF_DIRECT	GO:0019903~protein phosphatase binding	3	2.5641	0.0944232	HSP90AA1, CSK, JAK3	113	89	19304	5.75838	1	0.844086	0.824057
GOTERM_BP_DIRECT	GO:0043171~peptide catabolic process	2	1.7094	0.0949282	ERAP1, LNPEP	110	18	19734	19.9333	1	1	0.993392
GOTERM_BP_DIRECT	GO:0071380~cellular response to prostaglandin E stimulus	2	1.7094	0.0949282	GNB1, GNAS	110	18	19734	19.9333	1	1	0.993392
GOTERM_BP_DIRECT	GO:0098586~cellular response to virus	3	2.5641	0.0953101	HSP90AA1, ADAR, NFKB1	110	94	19734	5.72553	1	1	0.993392
UP_KW_LIGAND	KW-0460~Magnesium	8	6.83761	0.0973457	TSNAX, GNAS, MT-CO2, CSK, STT3B, MT-CYB, GNAI2, TGFBR2	41	692	6947	1.95883	0.805758	0.771447	0.771447
UP_KW_DISEASE	KW-0429~Leber hereditary optic neuropathy	2	1.7094	0.0979534	MT-ATP6, MT-CYB	39	13	4817	19.002	0.963074	0.783627	0.783627
GOTERM_BP_DIRECT	GO:0032695~negative regulation of interleukin-12 production	2	1.7094	0.0999319	JAK3, NFKB1	110	19	19734	18.8842	1	1	0.993392
GOTERM_BP_DIRECT	GO:0031396~regulation of protein ubiquitination	2	1.7094	0.0999319	HSP90AA1, HSP90AB1	110	19	19734	18.8842	1	1	0.993392
GOTERM_BP_DIRECT	GO:0061158~3'-UTR-mediated mRNA destabilization	2	1.7094	0.0999319	HNRNPD, TARDBP	110	19	19734	18.8842	1	1	0.993392

## Sheet: early_brown_GO
Category	Term	Count	%	PValue	Genes	List Total	Pop Hits	Pop Total	Fold Enrichment	Bonferroni	Benjamini	FDR
GOTERM_CC_DIRECT	GO:0005576~extracellular region	18	50	7.98917e-09	CDA, CSF3R, GCA, TNFAIP6, IL1R2, HSPA6, BST1, FCGR3B, IGKV1-12, PROK2, PADI2, S100A12, ALPL, MNDA, S100P, S100A9, S100A8, CAMP	36	2101	20887	4.97073	7.42993e-07	7.42993e-07	6.87069e-07
GOTERM_MF_DIRECT	GO:0005509~calcium ion binding	11	30.5556	2.88761e-07	GCA, TNFAIP6, ANXA3, DYSF, PADI2, ALPL, S100A12, S100P, S100A9, SLC8A1, S100A8	34	746	19304	8.37187	3.29183e-05	3.29188e-05	3.23413e-05
GOTERM_BP_DIRECT	GO:0030593~neutrophil chemotaxis	6	16.6667	3.42504e-07	CSF3R, FCER1G, CXCR2, S100A12, S100A9, S100A8	36	83	19734	39.6265	0.000110623	5.78911e-05	5.66365e-05
GOTERM_BP_DIRECT	GO:0042742~defense response to bacterium	7	19.4444	3.58459e-07	FCER1G, ANXA3, SLC11A1, S100A12, S100A9, CAMP, S100A8	36	161	19734	23.8333	0.000115775	5.78911e-05	5.66365e-05
GOTERM_MF_DIRECT	GO:0050786~RAGE receptor binding	4	11.1111	1.28663e-06	S100A12, S100P, S100A9, S100A8	34	13	19304	174.697	0.000146665	7.33377e-05	7.20511e-05
GOTERM_CC_DIRECT	GO:0034774~secretory granule lumen	6	16.6667	1.3766e-06	CDA, HSPA6, S100A12, S100P, S100A9, S100A8	36	116	20887	30.0101	0.000128016	6.4012e-05	5.91939e-05
GOTERM_CC_DIRECT	GO:0005886~plasma membrane	23	63.8889	8.09892e-06	RGS18, P2RY13, CSF3R, FCER1G, GCA, ANXA3, IL1R2, SLC11A1, HSPA6, DYSF, SLC8A1, BST1, RGS2, FCGR2A, FCGR3B, BASP1, CXCR2, IGKV1-12, S100A12, ALPL, S100A9, S100A8, GAPT	36	5592	20887	2.38635	0.000752919	0.000251067	0.000232169
INTERPRO	IPR001751:S100/CaBP7/8-like_CS	4	11.1111	1.00618e-05	S100A12, S100P, S100A9, S100A8	36	25	20607	91.5867	0.00123684	0.000878315	0.000878315
UP_KW_LIGAND	KW-0106~Calcium	11	30.5556	1.10568e-05	GCA, TNFAIP6, ANXA3, DYSF, PADI2, ALPL, S100A12, S100P, S100A9, SLC8A1, S100A8	17	984	6947	4.56821	0.000154784	0.000154795	0.000154795
GOTERM_MF_DIRECT	GO:0048306~calcium-dependent protein binding	5	13.8889	1.12659e-05	ANXA3, S100A12, S100P, S100A9, S100A8	34	82	19304	34.6198	0.00128349	0.000428103	0.000420592
INTERPRO	IPR013787:S100_Ca-bd_sub	4	11.1111	1.42816e-05	S100A12, S100P, S100A9, S100A8	36	28	20607	81.7738	0.0017551	0.000878315	0.000878315
SMART	SM01394:S_100	4	11.1111	1.77987e-05	S100A12, S100P, S100A9, S100A8	21	28	10692	72.7347	0.000409289	0.000409369	0.000409369
UP_KW_CELLULAR_COMPONENT	KW-1003~Cell membrane	19	52.7778	2.08254e-05	P2RY13, CSF3R, FCER1G, IL1R2, DYSF, SLC8A1, BST1, RGS2, FCGR2A, FCGR3B, BASP1, CXCR2, IGKV1-12, S100A12, ALPL, S100P, S100A9, S100A8, GAPT	32	4049	17942	2.63104	0.000353972	0.000354031	0.000354031
GOTERM_CC_DIRECT	GO:0070062~extracellular exosome	14	38.8889	3.95334e-05	GCA, ANXA3, HSPA6, DYSF, BST1, FCGR3B, BASP1, PADI2, ALPL, MNDA, S100P, S100A9, S100A8, CAMP	36	2258	20887	3.59731	0.00366993	0.000919152	0.000849969
GOTERM_BP_DIRECT	GO:0006954~inflammatory response	7	19.4444	8.85508e-05	TNFAIP6, SLC11A1, CXCR2, PROK2, S100A12, S100A9, S100A8	36	422	19734	9.09281	0.028198	0.00953397	0.00932735
INTERPRO	IPR011992:EF-hand-dom_pair	6	16.6667	9.71038e-05	GCA, TBC1D8, S100A12, S100P, S100A9, S100A8	36	276	20607	12.4438	0.0118733	0.00398126	0.00398126
GOTERM_MF_DIRECT	GO:0019864~IgG binding	3	8.33333	0.000185048	FCGR2A, FCGR3B, FCER1G	34	12	19304	141.941	0.0208765	0.00527388	0.00518135
UP_SEQ_FEATURE	DOMAIN:EF-hand 1	5	13.8889	0.000252941	GCA, S100A12, S100P, S100A9, S100A8	35	188	20569	15.6299	0.049336	0.0274069	0.0274069
UP_SEQ_FEATURE	DOMAIN:EF-hand 2	5	13.8889	0.000274069	GCA, S100A12, S100P, S100A9, S100A8	35	192	20569	15.3043	0.0533457	0.0274069	0.0274069
GOTERM_BP_DIRECT	GO:0038094~Fc-gamma receptor signaling pathway	3	8.33333	0.000274391	FCGR2A, FCGR3B, FCER1G	36	14	19734	117.464	0.0848254	0.0221571	0.0216769
INTERPRO	IPR002048:EF_hand_dom	5	13.8889	0.000633316	GCA, S100A12, S100P, S100A9, S100A8	36	233	20607	12.2836	0.0749639	0.0194745	0.0194745
GOTERM_CC_DIRECT	GO:1904813~ficolin-1-rich granule lumen	4	11.1111	0.0011907	CDA, TNFAIP6, HSPA6, MNDA	36	125	20887	18.5662	0.104883	0.022147	0.02048
UP_KW_CELLULAR_COMPONENT	KW-0472~Membrane	24	66.6667	0.00161447	P2RY13, CSF3R, FCER1G, GCA, ACSL1, IL1R2, SLC11A1, DYSF, MBOAT2, SLC8A1, BST1, RGS2, FCGR2A, FCGR3B, ZDHHC19, BASP1, CXCR2, IGKV1-12, S100A12, ALPL, S100P, S100A9, S100A8, GAPT	32	8340	17942	1.61349	0.0270943	0.013723	0.013723
GOTERM_BP_DIRECT	GO:0043542~endothelial cell migration	3	8.33333	0.00185368	S100A12, S100P, S100A9	36	36	19734	45.6806	0.450801	0.0875724	0.0856746
GOTERM_BP_DIRECT	GO:0050832~defense response to fungus	3	8.33333	0.00185368	S100A12, S100A9, S100A8	36	36	19734	45.6806	0.450801	0.0875724	0.0856746
GOTERM_BP_DIRECT	GO:0032496~response to lipopolysaccharide	4	11.1111	0.00189785	SLC11A1, ALPL, S100A9, S100A8	36	139	19734	15.7746	0.458596	0.0875724	0.0856746
UP_KW_MOLECULAR_FUNCTION	KW-0929~Antimicrobial	4	11.1111	0.00194899	S100A12, S100A9, CAMP, S100A8	27	115	11889	15.3159	0.0420115	0.0428777	0.0428777
GOTERM_CC_DIRECT	GO:1990660~calprotectin complex	2	5.55556	0.00334864	S100A9, S100A8	36	2	20887	580.194	0.267979	0.0519039	0.0479972
GOTERM_BP_DIRECT	GO:0070488~neutrophil aggregation	2	5.55556	0.00354412	S100A9, S100A8	36	2	19734	548.167	0.682343	0.127195	0.124438
GOTERM_BP_DIRECT	GO:0032119~sequestering of zinc ion	2	5.55556	0.00354412	S100A9, S100A8	36	2	19734	548.167	0.682343	0.127195	0.124438
GOTERM_CC_DIRECT	GO:1904724~tertiary granule lumen	3	8.33333	0.00396902	CDA, TNFAIP6, CAMP	36	56	20887	31.0818	0.309164	0.0527312	0.0487622
GOTERM_BP_DIRECT	GO:0050766~positive regulation of phagocytosis	3	8.33333	0.00427815	FCGR2A, FCER1G, SLC11A1	36	55	19734	29.9	0.749628	0.138184	0.13519
KEGG_PATHWAY	hsa05152:Tuberculosis	4	11.1111	0.00540854	FCGR2A, FCGR3B, FCER1G, CAMP	19	180	8840	10.3392	0.3555	0.438092	0.438092
GOTERM_CC_DIRECT	GO:0009897~external side of plasma membrane	5	13.8889	0.00555412	CSF3R, FCGR2A, FCGR3B, FCER1G, CXCR2	36	429	20887	6.76217	0.404273	0.0645666	0.0597068
UP_KW_BIOLOGICAL_PROCESS	KW-0391~Immunity	7	19.4444	0.00628738	FCGR2A, FCER1G, IGKV1-12, S100A12, S100A9, CAMP, S100A8	22	963	11450	3.78316	0.167157	0.0999294	0.0999294
GOTERM_MF_DIRECT	GO:0035662~Toll-like receptor 4 binding	2	5.55556	0.00682098	S100A9, S100A8	34	4	19304	283.882	0.541711	0.155518	0.15279
UP_KW_BIOLOGICAL_PROCESS	KW-0399~Innate immunity	5	13.8889	0.00689168	FCER1G, S100A12, S100A9, CAMP, S100A8	22	427	11450	6.09432	0.18172	0.0999294	0.0999294
GOTERM_BP_DIRECT	GO:0018119~peptidyl-cysteine S-nitrosylation	2	5.55556	0.00707604	S100A9, S100A8	36	4	19734	274.083	0.899106	0.207778	0.203275
GOTERM_MF_DIRECT	GO:0042803~protein homodimerization activity	6	16.6667	0.00840421	CDA, FCER1G, GCA, SLC11A1, PADI2, S100P	34	750	19304	4.54212	0.617921	0.15968	0.156879
UP_KW_CELLULAR_COMPONENT	KW-0964~Secreted	10	27.7778	0.00941399	CSF3R, FCGR3B, TNFAIP6, IL1R2, IGKV1-12, PROK2, S100A12, S100A9, CAMP, S100A8	32	2180	17942	2.57196	0.148534	0.0533459	0.0533459
GOTERM_CC_DIRECT	GO:0035578~azurophil granule lumen	3	8.33333	0.0101744	GCA, PADI2, MNDA	36	91	20887	19.1273	0.613669	0.105135	0.0972216
GOTERM_BP_DIRECT	GO:0006955~immune response	5	13.8889	0.0118457	FCGR3B, IL1R2, SLC11A1, CXCR2, IGKV1-12	36	505	19734	5.42739	0.978699	0.284224	0.278064
GOTERM_MF_DIRECT	GO:0050544~arachidonic acid binding	2	5.55556	0.0119071	S100A9, S100A8	34	7	19304	162.218	0.744761	0.193755	0.190356
GOTERM_BP_DIRECT	GO:0008284~positive regulation of cell population proliferation	5	13.8889	0.0119252	BST1, CXCR2, TBC1D8, S100P, CAMP	36	506	19734	5.41667	0.979246	0.284224	0.278064
GOTERM_BP_DIRECT	GO:0035425~autocrine signaling	2	5.55556	0.0123511	S100A9, S100A8	36	7	19734	156.619	0.981944	0.284224	0.278064
GOTERM_CC_DIRECT	GO:0030667~secretory granule membrane	3	8.33333	0.0126519	FCGR2A, FCGR3B, CXCR2	36	102	20887	17.0645	0.693989	0.117663	0.108806
GOTERM_MF_DIRECT	GO:0019770~IgG receptor activity	2	5.55556	0.0135968	FCGR2A, FCGR3B	34	8	19304	141.941	0.790005	0.193755	0.190356
GOTERM_BP_DIRECT	GO:0045087~innate immune response	5	13.8889	0.0144732	FCER1G, S100A12, S100A9, CAMP, S100A8	36	536	19734	5.1135	0.990986	0.284224	0.278064
UP_KW_BIOLOGICAL_PROCESS	KW-0145~Chemotaxis	3	8.33333	0.0147798	CXCR2, S100A9, S100A8	22	102	11450	15.3075	0.350669	0.142871	0.142871
UP_KW_PTM	KW-1015~Disulfide bond	13	36.1111	0.0153657	P2RY13, CSF3R, FCER1G, TNFAIP6, IL1R2, BST1, FCGR2A, FCGR3B, CXCR2, IGKV1-12, PROK2, ALPL, CAMP	25	3906	14252	1.89735	0.169577	0.165485	0.165485
GOTERM_BP_DIRECT	GO:0002544~chronic inflammatory response	2	5.55556	0.0158527	S100A9, S100A8	36	9	19734	121.815	0.994267	0.284224	0.278064
GOTERM_BP_DIRECT	GO:0061844~antimicrobial humoral immune response mediated by antimicrobial peptide	3	8.33333	0.0159736	S100A12, S100A9, CAMP	36	109	19734	15.0872	0.99449	0.284224	0.278064
GOTERM_BP_DIRECT	GO:0050729~positive regulation of inflammatory response	3	8.33333	0.0162515	S100A12, S100A9, S100A8	36	110	19734	14.95	0.99497	0.284224	0.278064
KEGG_PATHWAY	hsa05150:Staphylococcus aureus infection	3	8.33333	0.0172284	FCGR2A, FCGR3B, CAMP	19	100	8840	13.9579	0.755285	0.69775	0.69775
GOTERM_BP_DIRECT	GO:0034121~regulation of toll-like receptor signaling pathway	2	5.55556	0.017599	S100A9, S100A8	36	10	19734	109.633	0.996769	0.284224	0.278064
GOTERM_BP_DIRECT	GO:0001788~antibody-dependent cellular cytotoxicity	2	5.55556	0.017599	FCGR2A, FCGR3B	36	10	19734	109.633	0.996769	0.284224	0.278064
GOTERM_BP_DIRECT	GO:0007166~cell surface receptor signaling pathway	4	11.1111	0.0190052	CDA, FCGR2A, FCGR3B, CXCR2	36	321	19734	6.83074	0.997966	0.292318	0.285983
UP_KW_MOLECULAR_FUNCTION	KW-0390~IgG-binding protein	2	5.55556	0.0195173	FCGR2A, FCGR3B	27	9	11889	97.8519	0.351845	0.21469	0.21469
GOTERM_CC_DIRECT	GO:0042581~specific granule	2	5.55556	0.0215723	ANXA3, CAMP	36	13	20887	89.2607	0.868426	0.182384	0.168656
GOTERM_BP_DIRECT	GO:0051092~positive regulation of NF-kappaB transcription factor activity	3	8.33333	0.0245143	S100A12, S100A9, S100A8	36	137	19734	12.0036	0.99967	0.330456	0.323294
GOTERM_BP_DIRECT	GO:0055119~relaxation of cardiac muscle	2	5.55556	0.024554	RGS2, SLC8A1	36	14	19734	78.3095	0.999674	0.330456	0.323294
GOTERM_BP_DIRECT	GO:0002523~leukocyte migration involved in inflammatory response	2	5.55556	0.024554	S100A9, S100A8	36	14	19734	78.3095	0.999674	0.330456	0.323294
UP_KW_PTM	KW-0336~GPI-anchor	3	8.33333	0.0254592	BST1, FCGR3B, ALPL	25	148	14252	11.5557	0.266162	0.165485	0.165485
GOTERM_BP_DIRECT	GO:0014002~astrocyte development	2	5.55556	0.0297389	S100A9, S100A8	36	17	19734	64.4902	0.999942	0.384226	0.375899
INTERPRO	IPR024066:RGS_subdom1/3	2	5.55556	0.030147	RGS18, RGS2	36	18	20607	63.6019	0.976835	0.717911	0.717911
SMART	SM00054:EFh	3	8.33333	0.0311032	GCA, S100P, S100A9	21	149	10692	10.2512	0.516515	0.357687	0.357687
GOTERM_BP_DIRECT	GO:0042119~neutrophil activation	2	5.55556	0.0314612	CXCR2, CAMP	36	18	19734	60.9074	0.999967	0.390845	0.382374
GOTERM_CC_DIRECT	GO:0031982~vesicle	3	8.33333	0.0361199	BASP1, HSPA6, CAMP	36	179	20887	9.72393	0.967331	0.279929	0.258859
INTERPRO	IPR018247:EF_Hand_1_Ca_BS	3	8.33333	0.0377706	GCA, S100A9, S100A8	36	181	20607	9.48757	0.991225	0.717911	0.717911
GOTERM_BP_DIRECT	GO:0051493~regulation of cytoskeleton organization	2	5.55556	0.041733	S100A9, S100A8	36	24	19734	45.6806	0.999999	0.49925	0.48843
UP_KW_BIOLOGICAL_PROCESS	KW-0395~Inflammatory response	3	8.33333	0.0490205	S100A12, S100A9, S100A8	22	195	11450	8.00699	0.76721	0.355398	0.355398
UP_SEQ_FEATURE	DOMAIN:Ig-like C2-type 2	3	8.33333	0.0506613	FCGR2A, FCGR3B, IL1R2	35	219	20569	8.05049	0.99997	1	1
UP_SEQ_FEATURE	DOMAIN:Ig-like C2-type 1	3	8.33333	0.0506613	FCGR2A, FCGR3B, IL1R2	35	219	20569	8.05049	0.99997	1	1
GOTERM_BP_DIRECT	GO:0015908~fatty acid transport	2	5.55556	0.0518989	RBP7, ACSL1	36	30	19734	36.5444	1	0.598691	0.585716
GOTERM_MF_DIRECT	GO:0005516~calmodulin binding	3	8.33333	0.052018	RGS2, BASP1, SLC8A1	34	215	19304	7.9223	0.997734	0.658894	0.647335
GOTERM_CC_DIRECT	GO:0005856~cytoskeleton	4	11.1111	0.0552762	BASP1, S100A12, S100A9, S100A8	36	518	20887	4.48027	0.994949	0.395438	0.365674
KEGG_PATHWAY	hsa04613:Neutrophil extracellular trap formation	3	8.33333	0.0571735	FCGR2A, FCGR3B, CAMP	19	192	8840	7.26974	0.991509	1	1
INTERPRO	IPR036179:Ig-like_dom_sf	5	13.8889	0.0576571	CSF3R, FCGR2A, FCGR3B, IL1R2, IGKV1-12	36	865	20607	3.30877	0.999327	0.717911	0.717911
UP_SEQ_FEATURE	DOMAIN:RGS	2	5.55556	0.0578653	RGS18, RGS2	35	36	20569	32.6492	0.999993	1	1
INTERPRO	IPR016137:RGS	2	5.55556	0.0594104	RGS18, RGS2	36	36	20607	31.8009	0.999465	0.717911	0.717911
INTERPRO	IPR003599:Ig_sub	4	11.1111	0.0600775	FCGR2A, FCGR3B, IL1R2, IGKV1-12	36	529	20607	4.32829	0.99951	0.717911	0.717911
GOTERM_BP_DIRECT	GO:0050776~regulation of immune response	2	5.55556	0.0602904	FCGR2A, FCGR3B	36	35	19734	31.3238	1	0.642232	0.628314
UP_KW_DOMAIN	KW-0393~Immunoglobulin domain	5	13.8889	0.0616243	CSF3R, FCGR2A, FCGR3B, IL1R2, IGKV1-12	29	788	14597	3.19381	0.398807	0.492995	0.492995
GOTERM_BP_DIRECT	GO:0055074~calcium ion homeostasis	2	5.55556	0.06196	ALPL, SLC8A1	36	36	19734	30.4537	1	0.642232	0.628314
GOTERM_BP_DIRECT	GO:0071407~cellular response to organic cyclic compound	2	5.55556	0.06196	P2RY13, ALPL	36	36	19734	30.4537	1	0.642232	0.628314
INTERPRO	IPR044926:RGS_subdomain_2	2	5.55556	0.0626084	RGS18, RGS2	36	38	20607	30.1272	0.999648	0.717911	0.717911
SMART	SM00315:RGS	2	5.55556	0.0635277	RGS18, RGS2	21	35	10692	29.0939	0.779004	0.422319	0.422319
GOTERM_BP_DIRECT	GO:2001244~positive regulation of intrinsic apoptotic signaling pathway	2	5.55556	0.0636267	S100A9, S100A8	36	37	19734	29.6306	1	0.642232	0.628314
INTERPRO	IPR036305:RGS_sf	2	5.55556	0.0642035	RGS18, RGS2	36	39	20607	29.3547	0.999715	0.717911	0.717911
GOTERM_CC_DIRECT	GO:0030315~T-tubule	2	5.55556	0.0727654	DYSF, SLC8A1	36	45	20887	25.7864	0.999112	0.451145	0.417188
GOTERM_CC_DIRECT	GO:0008180~COP9 signalosome	2	5.55556	0.0727654	BASP1, HSPA6	36	45	20887	25.7864	0.999112	0.451145	0.417188
SMART	SM00409:IG	4	11.1111	0.0734467	FCGR2A, FCGR3B, IL1R2, IGKV1-12	21	529	10692	3.84985	0.827011	0.422319	0.422319
GOTERM_BP_DIRECT	GO:0021762~substantia nigra development	2	5.55556	0.081772	BASP1, PADI2	36	48	19734	22.8403	1	0.776834	0.759999
GOTERM_BP_DIRECT	GO:0008277~regulation of G protein-coupled receptor signaling pathway	2	5.55556	0.081772	RGS18, RGS2	36	48	19734	22.8403	1	0.776834	0.759999
GOTERM_BP_DIRECT	GO:0051384~response to glucocorticoid	2	5.55556	0.0850343	ANXA3, ALPL	36	50	19734	21.9267	1	0.784745	0.767738
GOTERM_MF_DIRECT	GO:0005096~GTPase activator activity	3	8.33333	0.0855678	RGS18, RGS2, TBC1D8	34	286	19304	5.95557	0.999963	0.932008	0.915657
UP_SEQ_FEATURE	PROPEP:Removed in mature form	3	8.33333	0.0857164	BST1, FCGR3B, ALPL	35	296	20569	5.95627	1	1	1
GOTERM_BP_DIRECT	GO:0031623~receptor internalization	2	5.55556	0.0882852	FCER1G, CXCR2	36	52	19734	21.0833	1	0.792115	0.774948
GOTERM_MF_DIRECT	GO:0005544~calcium-dependent phospholipid binding	2	5.55556	0.0899306	ANXA3, DYSF	34	55	19304	20.646	0.999978	0.932008	0.915657
UP_SEQ_FEATURE	TRANSMEM:Helical	14	38.8889	0.0899438	P2RY13, CSF3R, FCER1G, ACSL1, IL1R2, SLC11A1, DYSF, MBOAT2, SLC8A1, FCGR2A, FCGR3B, ZDHHC19, CXCR2, GAPT	35	5446	20569	1.51076	1	1	1
GOTERM_BP_DIRECT	GO:0006968~cellular defense response	2	5.55556	0.091525	CXCR2, MNDA	36	54	19734	20.3025	1	0.798988	0.781673
UP_SEQ_FEATURE	LIPID:GPI-anchor amidated serine	2	5.55556	0.093119	FCGR3B, ALPL	35	59	20569	19.9215	1	1	1
GOTERM_CC_DIRECT	GO:0101003~ficolin-1-rich granule membrane	2	5.55556	0.0973765	FCER1G, SLC11A1	36	61	20887	19.0228	0.999927	0.566001	0.523399
UP_SEQ_FEATURE	DOMAIN:Ig-like	4	11.1111	0.0979021	FCGR2A, FCGR3B, IL1R2, IGKV1-12	35	670	20569	3.50857	1	1	1

## Sheet: early_turquoise_GO
Category	Term	Count	%	PValue	Genes	List Total	Pop Hits	Pop Total	Fold Enrichment	Bonferroni	Benjamini	FDR
GOTERM_BP_DIRECT	GO:0002181~cytoplasmic translation	62	31.6327	2.63098e-102	RPL5, RPL30, RPL3, RPL32, RPL34, RPLP1, RPLP0, RPL10A, RPL8, RPL9, RPL6, RPL7, RPS4X, RPS15, RPS14, RPL7A, RPS19, RPL18A, RPS18, RPL36, RACK1, RPLP2, RPL35, RPL38, RPL37, RPL39, RPS10, RPS13, RPS12, RPS9, RPL21, RPS7, RPS8, RPS5, RPL22, RPS6, RPS3A, RPSA, RPL24, RPL27, RPL26, RPL29, RPL28, RPL10, RPL12, RPL11, RPS15A, RPS3, RPL14, RPL13, RPL15, RPS27A, RPL18, RPL19, RPL35A, RPS25, RPS28, RPS27, F…	188	97	19734	67.093	3.15718e-99	3.15718e-99	3.12561e-99
GOTERM_CC_DIRECT	GO:0022626~cytosolic ribosome	60	30.6122	6.9861e-100	RPL5, RPL30, RPL3, RPL32, RPL34, RPLP1, RPLP0, RPL10A, RPL8, RPL9, RPL6, RPL7, RPS4X, RPS15, RPS14, RPL7A, RPS19, RPL18A, RPS18, RPL36, RPL35, RPL38, RPL37, RPL39, RPS10, RPS13, RPS12, RPS9, RPL21, RPS7, RPS8, RPS5, RPL22, RPS6, RPS3A, RPSA, EEF1A1, RPL24, RPL27, RPL26, RPL29, RPL28, RPL10, RPL12, RPL11, RPS15A, RPS3, RPL14, RPL13, RPL15, RPS27A, RPL18, RPL19, RPL35A, RPS25, RPS27, FAU, RPS21, RP…	190	94	20887	70.1691	2.04693e-97	2.04693e-97	1.78145e-97
GOTERM_BP_DIRECT	GO:0006412~translation	64	32.6531	1.84184e-80	RPL5, RPL30, RPL3, RPL32, RPL34, RPLP1, RPLP0, RPL10A, RPL8, RPL9, RPL6, RPL7, RPS4X, RPS15, RPS14, RPL7A, RPS19, RPL18A, RPS18, RPL36, RPLP2, RPL35, RPL38, RPL37, RPL39, RPS10, RPS13, RPS12, RPS9, RPL21, RPS7, RPS8, RPS5, RPL22, RPS6, RPS3A, RPSA, EEF1A1, RPL24, RPL27, RPL26, RPL29, RPL28, RPL10, RPL12, RPL11, RPS4Y1, RPS15A, RPS3, RPL14, RPL13, RPL15, RPS27A, RPL18, RPL19, RPL35A, RPS25, RPS28,…	188	202	19734	33.2572	2.21021e-77	1.1051e-77	1.09405e-77
GOTERM_MF_DIRECT	GO:0003735~structural constituent of ribosome	62	31.6327	1.2893e-77	RPL5, RPL30, RPL3, RPL32, RPL34, RPLP1, RPLP0, RPL10A, RPL8, RPL9, RPL6, RPL7, RPS4X, RPS15, RPS14, RPL7A, RPS19, RPL18A, RPS18, RPL36, RPLP2, RPL35, RPL38, RPL37, RPL39, RPS10, RPS13, RPS12, RPS9, RPL21, RPS7, RPS8, RPS5, RPL22, RPS6, RPS3A, RPSA, RPL24, RPL27, RPL26, RPL29, RPL28, RPL10, RPL12, RPL11, RPS4Y1, RPS15A, RPS3, RPL14, RPL13, RPL15, RPS27A, RPL18, RPL19, RPL35A, RPS25, RPS28, RPS27, …	190	191	19304	32.9801	4.62859e-75	4.62859e-75	4.48677e-75
UP_KW_MOLECULAR_FUNCTION	KW-0689~Ribosomal protein	63	32.1429	2.0157e-73	RPL5, RPL30, RPL3, RPL32, RPL34, RPLP1, RPLP0, RPL10A, RPL8, RPL9, RPL6, RPL7, RPS4X, RPS15, RPS14, RPL7A, RPS19, RPL18A, RPS18, RPL36, RACK1, RPLP2, RPL35, RPL38, RPL37, RPL39, RPS10, RPS13, RPS12, RPS9, RPL21, RPS7, RPS8, RPS5, RPL22, RPS6, RPS3A, RPSA, RPL24, RPL27, RPL26, RPL29, RPL28, RPL10, RPL12, RPL11, RPS4Y1, RPS15A, RPS3, RPL14, RPL13, RPL15, RPS27A, RPL18, RPL19, RPL35A, RPS25, RPS28, …	150	197	11889	25.3471	1.1691e-71	1.1691e-71	1.1691e-71
KEGG_PATHWAY	hsa03010:Ribosome	62	31.6327	5.45687e-71	RPL5, RPL30, RPL3, RPL32, RPL34, RPLP1, RPLP0, RPL10A, RPL8, RPL9, RPL6, RPL7, RPS4X, RPS15, RPS14, RPL7A, RPS19, RPL18A, RPS18, RPL36, RPLP2, RPL35, RPL38, RPL37, RPL39, RPS10, RPS13, RPS12, RPS9, RPL21, RPS7, RPS8, RPS5, RPL22, RPS6, RPS3A, RPSA, RPL24, RPL27, RPL26, RPL29, RPL28, RPL10, RPL12, RPL11, RPS4Y1, RPS15A, RPS3, RPL14, RPL13, RPL15, RPS27A, RPL18, RPL19, RPL35A, RPS25, RPS28, RPS27, …	138	172	8840	23.0907	1.04772e-68	1.04772e-68	1.0368e-68
KEGG_PATHWAY	hsa05171:Coronavirus disease - COVID-19	62	31.6327	5.09131e-61	RPL5, RPL30, RPL3, RPL32, RPL34, RPLP1, RPLP0, RPL10A, RPL8, RPL9, RPL6, RPL7, RPS4X, RPS15, RPS14, RPL7A, RPS19, RPL18A, RPS18, RPL36, RPLP2, RPL35, RPL38, RPL37, RPL39, RPS10, RPS13, RPS12, RPS9, RPL21, RPS7, RPS8, RPS5, RPL22, RPS6, RPS3A, RPSA, RPL24, RPL27, RPL26, RPL29, RPL28, RPL10, RPL12, RPL11, RPS4Y1, RPS15A, RPS3, RPL14, RPL13, RPL15, RPS27A, RPL18, RPL19, RPL35A, RPS25, RPS28, RPS27, …	138	238	8840	16.6874	9.77532e-59	4.88766e-59	4.83675e-59
UP_KW_MOLECULAR_FUNCTION	KW-0687~Ribonucleoprotein	64	32.6531	1.05986e-60	RPL5, RPL30, RPL3, RPL32, RPL34, RPLP1, RPLP0, RPL10A, RPL8, RPL9, RPL6, RPL7, RPS4X, RPS15, RPS14, RPL7A, RPS19, RPL18A, RPS18, RPL36, RACK1, RPLP2, RPL35, RPL38, RPL37, RPL39, RPS10, RPS13, RPS12, RPS9, RPL21, RPS7, RPS8, RPS5, RPL22, RPS6, RPS3A, RPSA, RPL24, RPL27, RPL26, RPL29, RPL28, RPL10, RPL12, RPL11, RPS4Y1, RPS15A, RPS3, RPL14, RPL13, RPL15, RPS27A, HNRNPA1, RPL18, RPL19, RPL35A, RPS25…	150	316	11889	16.0527	6.1472e-59	3.0736e-59	3.0736e-59
GOTERM_CC_DIRECT	GO:0022625~cytosolic large ribosomal subunit	36	18.3673	1.42556e-51	RPL5, RPL30, RPL3, RPL32, RPL10, RPL34, RPLP1, RPL12, RPLP0, RPL11, RPL10A, RPL8, RPL9, RPL6, RPL7, RPL7A, RPL18A, RPL36, RPL14, RPL35, RPLP2, RPL13, RPL38, RPL37, RPL15, RPL18, RPL39, RPL19, RPL21, RPL22, RPL35A, RPL24, RPL27, RPL26, RPL29, RPL28	190	78	20887	50.7377	4.1769e-49	2.08845e-49	1.81759e-49
GOTERM_CC_DIRECT	GO:0005925~focal adhesion	53	27.0408	1.61769e-43	RPL5, RPL30, RPL3, RPLP1, RPLP0, ITGB2, RPL10A, RPL8, RPL9, ACTB, RPL6, RPL7, RPS4X, RPS15, RPS14, RPL7A, RPS19, RPS18, CFL1, ANXA6, CAPN2, RPLP2, RPL38, B2M, RPS10, RPS13, PDIA3, RPS9, RPS7, ITGA4, RPS8, RPS5, RPL22, ANXA5, RPS3A, PALLD, RPL27, LCP1, PABPC1, PFN1, PPIB, RPL12, HSP90B1, RPS3, RPL18, CD99, RPL19, NPM1, HSPA5, MSN, PTPRC, ARPC2, CALR	190	435	20887	13.394	4.73983e-41	1.57994e-41	1.37503e-41
GOTERM_CC_DIRECT	GO:0022627~cytosolic small ribosomal subunit	27	13.7755	5.03403e-40	RPS4Y1, RPS15, RPS4X, RPS14, RPS15A, RPS19, RPS18, RACK1, RPS3, RPS27A, RPS10, RPS13, RPS12, RPS9, RPS7, RPS8, RPS5, RPS6, RPSA, RPS3A, RPS25, RPS28, RPS27, FAU, RPS21, RPS24, RPS23	190	52	20887	57.0799	1.47497e-37	3.68743e-38	3.20919e-38
GOTERM_MF_DIRECT	GO:0003723~RNA binding	80	40.8163	2.68626e-39	RPL5, RPL30, RPL3, RPL32, RPL34, RPLP0, RPL10A, RPL8, RPL9, RPL6, RPL7, RPS4X, RPS15, RPS14, RPL7A, RPS19, RPL18A, RPS18, TMSB4X, RPL36, RACK1, RPL35, RPL38, RPL37, RPL39, RPS10, RPS13, RPS12, CAST, PDIA3, RPS9, RPL21, RPS7, RPS8, RPS5, RPL22, RPS6, NOSIP, RPS3A, RPSA, EEF1A1, RPL24, S100A4, RPL27, RPL26, PABPC1, RPL29, PFN1, PPIB, RPL28, RPL10, RPL12, RPL11, RPS4Y1, HSP90B1, RPS15A, RPS3, RPL14,…	190	1455	19304	5.58625	9.64367e-37	4.82183e-37	4.67409e-37
GOTERM_CC_DIRECT	GO:0005840~ribosome	33	16.8367	9.89729e-39	RPL10, RPLP1, RPS4Y1, RPL9, RPL6, RPS4X, RPS14, RPL7A, RPS19, RPS18, RPL36, RACK1, RPS3, RPL38, RPL15, RPS27A, RPS10, RPS13, RPS9, RPL21, RPS7, RPS5, RPL22, RPS6, RPS3A, EEF2, EEF1A1, RPS25, RPS28, RPS27, RPL27, CALR, RPS23	190	118	20887	30.7436	2.89991e-36	5.79981e-37	5.04762e-37
GOTERM_CC_DIRECT	GO:0070062~extracellular exosome	83	42.3469	9.81715e-31	SPON2, RPL5, RPL30, RPL3, RPL34, RPLP0, ITGB2, FASLG, RPL10A, ACTB, RPS4X, RPS14, FCGR3A, RPS19, RPS18, CFL1, RACK1, ANXA6, CAPN2, RPLP2, CD38, SH3BGRL3, CLIC1, B2M, GLUL, RPS13, PDIA3, RPS9, ITGA4, RPS8, RPS5, ANXA4, RPL22, ANXA5, HLA-B, HLA-C, RPS3A, RPSA, RHOC, PDIA6, TGFBR3, FGR, EEF1A1, MYL6, S100A6, RPL24, S100A4, RPL27, RPL26, LCP1, PABPC1, PFN1, PPIB, RPL28, ARL8A, RPL12, RPL11, IQGAP2, H…	190	2258	20887	4.04089	2.87643e-28	4.79404e-29	4.17229e-29
GOTERM_CC_DIRECT	GO:0005829~cytosol	124	63.2653	5.29957e-28	RPL5, RPL30, RPL3, RPL32, RPL34, RPL10A, RPL8, RPL9, ACTB, RPL6, RPL7, RPS15, EEF1B2, RPS14, RPS19, RPL18A, RPS18, CFL1, RPL36, CAPN2, RPL35, RPL38, RPL37, RPL39, B2M, RPS10, GLUL, RPS13, RPS12, CAST, RPS9, RPL21, RPS7, RPS8, RPS5, RPL22, RPS6, NOSIP, RPSA, PDIA6, EEF1A1, MYL6, S100A6, RPL24, RPL27, S100A4, RPL26, RPL29, PFN1, PPIB, RPL28, SH2D2A, IQGAP2, RPS4Y1, HSP90B1, LDHB, RNF213, BTF3, UBE2…	190	5649	20887	2.41308	1.55278e-25	2.21825e-26	1.93056e-26
GOTERM_CC_DIRECT	GO:0005737~cytoplasm	121	61.7347	3.66001e-25	RPL5, RPL30, RPL3, RPL32, RPL34, RPL10A, RPL8, RPL9, ACTB, RPL6, RPL7, RPS15, EEF1B2, RPS14, RPS19, RPL18A, RPS18, MYC, CFL1, RPL36, CAPN2, RPL35, RPL38, RPL37, RPS10, GLUL, RPS13, RPS12, CAST, ZNF683, GBP5, RPS9, RPL21, RPS7, RPS8, RPS5, RPL22, RPS6, NOSIP, RPSA, EEF1A1, S100A6, RPL24, RPL27, RPL26, RPL29, PFN1, PPIB, RPL28, ARL8A, SH2D2A, IQGAP2, LDHB, RNF213, S100A11, CD99, S100A10, BTF3, HSPA…	190	5754	20887	2.31173	1.07238e-22	1.34048e-23	1.16663e-23
UP_KW_DISEASE	KW-1024~Diamond-Blackfan anemia	15	7.65306	4.39487e-25	RPL5, RPS7, RPL11, RPL35A, RPS28, RPS15A, RPS27, RPS19, RPL35, RPL27, RPL26, RPL15, RPL18, RPS10, RPS24	49	20	4817	73.7296	1.18661e-23	1.18661e-23	1.18661e-23
GOTERM_CC_DIRECT	GO:0016020~membrane	111	56.6327	9.68246e-24	MT-ND4L, RPL5, RPL30, RPL32, RPL10A, RPL8, RPL9, ACTB, RPL6, RPL7, RPS15, RPS14, RPS19, RPL18A, RPS18, MYC, CFL1, RPL36, RPL35, B2M, RPS10, RPS13, RPS12, CAST, GBP5, RPS9, RPL21, RPS7, RPS8, RPS5, RPS6, HLA-B, HLA-C, RPSA, CYBA, EEF1A1, MYL6, CD8B, RPL24, MAL, RPL27, RPL26, RPL29, PFN1, PPIB, RPL28, ARL8A, GYPC, IQGAP2, RPS4Y1, HSP90B1, LDHB, RNF213, TSPAN2, CD99, S100A10, HSPA5, NBEAL2, EEF2, PT…	190	5048	20887	2.41728	2.83696e-21	3.15218e-22	2.74336e-22
GOTERM_BP_DIRECT	GO:0042274~ribosomal small subunit biogenesis	19	9.69388	1.24863e-20	NPM1, RPS9, RPS7, RPS8, RPS5, RPS6, RPS3A, RPS15, RPS4X, RPS14, RPS25, RPS28, RPS15A, RPS27, RPS19, RPS24, RPS13, RPS23, RPS12	188	76	19734	26.242	1.49835e-17	4.9945e-18	4.94456e-18
GOTERM_CC_DIRECT	GO:0032040~small-subunit processome	17	8.67347	8.69416e-18	RPS9, RPS7, RPS8, RPS5, RPS6, RPS3A, RPS4X, RPS14, RPS28, RPS15A, RPS27, RPS19, RPS27A, RPS24, RPS13, RPS23, RPS12	190	77	20887	24.2706	2.54739e-15	2.54739e-16	2.21701e-16
GOTERM_CC_DIRECT	GO:1990904~ribonucleoprotein complex	23	11.7347	2.40758e-17	RPL5, NPM1, RPS9, RPS7, RPS8, RPLP1, RPS5, RPL22, RPS6, RPLP0, RPS3A, EEF2, ACTB, RPL7, RPS4X, RPS3, RACK1, RPL27, RPL38, RPL26, PABPC1, HNRNPA1, RPS27A	190	210	20887	12.0401	7.05421e-15	6.41292e-16	5.58121e-16
UP_SEQ_FEATURE	CROSSLNK:Glycyl lysine isopeptide (Lys-Gly) (interchain with G-Cter in SUMO2); alternate	27	13.7755	8.23748e-17	RPL5, RPL30, RPL3, RPLP0, RPL11, RPL10A, RPL7A, RPS18, MYC, TMSB4X, RPS3, RPL13, RPL38, HNRNPA1, S100A10, NPM1, RPS7, RPS5, ANXA5, RPSA, RPS3A, ZEB2, NACA, BHLHE40, RPL24, PFN1, CALM1	184	350	20569	8.62365	8.61533e-14	6.39228e-14	6.35109e-14
UP_KW_PTM	KW-1017~Isopeptide bond	67	34.1837	9.16837e-17	RPL5, RPL30, RPL3, RPL32, RPL34, RPLP1, RPLP0, RPL10A, RPL8, ACTB, RPL6, EEF1B2, RPS4X, RPS15, RPS14, RPL7A, RPL18A, RPS18, MYC, TMSB4X, CFL1, RPL35, RPL38, LRRFIP1, RPS10, RPS13, CAST, RPS9, RPS7, RPS8, RPS5, RPS6, ANXA5, RPS3A, RPSA, CYBA, EEF1A1, ZEB2, RPL24, RPL26, PFN1, RPL28, RPL10, RPL12, LEF1, RPL11, RNF213, RPS3, RPL14, RPL13, RPL15, RPS27A, HNRNPA1, RPL18, GBP1, S100A10, RPL19, NPM1, HS…	175	1876	14252	2.90857	2.44249e-15	2.10873e-15	2.10873e-15
UP_KW_CELLULAR_COMPONENT	KW-0963~Cytoplasm	112	57.1429	1.14498e-16	RPL5, RPL30, RPL3, RPL32, RPL34, RPL10A, RPL8, RPL9, ACTB, RPL6, RPL7, RPS15, RPS14, RPS19, RPL18A, RPS18, MYC, CFL1, RPL36, CAPN2, RPL35, RPL38, RPL37, RPL39, RPS10, GLUL, RPS13, RPS12, GBP5, RPS9, RPL21, RPS7, RPS8, RPS5, RPL22, RPS6, NOSIP, RPSA, EEF1A1, S100A6, RPL24, RPL27, S100A4, RPL26, RPL29, PFN1, RPL28, ARL8A, SH2D2A, SP140, LDHB, RNF213, S100A11, BTF3, HSPA5, MSN, EEF2, HOPX, RPS25, RP…	179	5805	17942	1.9339	3.44169e-15	3.54945e-15	3.54945e-15
UP_KW_PTM	KW-0007~Acetylation	93	47.449	8.39449e-16	RPL5, RPL30, RPL3, RPL34, RPLP1, COX4I1, PLEK, RPL10A, COX7C, RPL9, ACTB, RPL6, RPL7, EEF1B2, RPS4X, RPS15, RPL7A, RPS19, RPS18, MYC, TMSB4X, CFL1, RPL36, RACK1, ANXA6, CAPN2, EFHD2, RPLP2, RPL35, RPL38, SH3BGRL3, RPL37, LRRFIP1, CLIC1, GLUL, RPS13, RPS12, CAST, PDIA3, RPS9, RPS7, RPS8, RPS5, ANXA4, RPS6, ANXA5, PPP2R5A, RPS3A, RPSA, COMMD6, EEF1A1, MYL6, ZEB2, EEF1D, S100A6, RPL24, S100A4, RPL27…	175	3511	14252	2.1572	1.95399e-14	9.65367e-15	9.65367e-15
UP_SEQ_FEATURE	CROSSLNK:Glycyl lysine isopeptide (Lys-Gly) (interchain with G-Cter in SUMO2)	45	22.9592	3.99974e-15	RPL3, RPL32, RPL10, RPL34, RPL12, RPL11, RPL10A, RPL8, RPL6, RPS15, EEF1B2, RPS4X, RPS14, RPL7A, RNF213, RPL18A, RPS18, MYC, CFL1, RPL14, RPS3, RPL35, RPL13, RPL38, LRRFIP1, RPL15, HNRNPA1, RPL18, RPS13, CAST, NPM1, RPS9, HSPA5, RPS7, RPS8, RPS6, ZEB2, BHLHE40, RPL24, EIF3H, RPL26, RPL28, RPS21, RPS24, RPS23	184	1277	20569	3.93928	3.10152e-12	1.5519e-12	1.5419e-12
GOTERM_CC_DIRECT	GO:0045202~synapse	28	14.2857	1.14456e-13	RPL34, ACTB, RPS15, RPS4X, RPL7A, RPS15A, RPL36, RPL13, RPL15, RPS27A, RPL19, RPS9, RPL21, RPS7, RPS5, RPS3A, EEF2, RPS28, PTPRC, SYT11, RGS10, RPL24, RPL27, RPL26, RPL28, RPS21, ARL8A, RPS23	190	505	20887	6.09522	3.3538e-11	2.79465e-12	2.4322e-12
GOTERM_CC_DIRECT	GO:0015935~small ribosomal subunit	9	4.59184	2.3605e-13	RPS4X, RPS25, RPS28, RPS18, RPS6, RACK1, FAU, RPS21, RPS24	190	15	20887	65.9589	6.91578e-11	5.32021e-12	4.63022e-12
GOTERM_BP_DIRECT	GO:0006364~rRNA processing	15	7.65306	1.75578e-11	RPL5, RPS7, RPS6, RPL11, RPL35A, RPL7, RPS15, RPS25, RPS28, RPS27, RPS19, RPL14, RPL27, RPL26, RPS24	188	127	19734	12.3978	2.10694e-08	5.26735e-09	5.21468e-09
UP_KW_PTM	KW-0832~Ubl conjugation	71	36.2245	5.05867e-11	RPL5, RPL30, RPL3, RPL32, RPL34, RPLP1, RPLP0, FASLG, RPL10A, RPL8, ACTB, RPL6, EEF1B2, RPS4X, RPS15, RPS14, RPL7A, RPL18A, RPS18, MYC, TMSB4X, CFL1, RPL35, RPL38, LRRFIP1, RPS10, GLUL, RPS13, CAST, RPS9, RPS7, RPS8, RPS5, RPS6, ANXA5, RPS3A, RPSA, CYBA, FGR, EEF1A1, ZEB2, RPL24, RPL26, PFN1, RPL28, RPL10, RPL12, LEF1, RPL11, RNF213, RPS3, RPL14, RPL13, RPL15, RPS27A, HNRNPA1, RPL18, GBP1, S100A1…	175	2701	14252	2.14078	1.11291e-09	3.87831e-10	3.87831e-10
GOTERM_CC_DIRECT	GO:0014069~postsynaptic density	18	9.18367	9.0702e-11	RPL30, RPL12, RPLP0, RPL10A, RPL8, RPL6, RPL7, RPS14, RPS25, RPS27, RPS19, SYT11, RPS18, RPS3, RPL14, RPL38, EIF3E, RPS13	190	244	20887	8.10971	2.65757e-08	1.89826e-09	1.65207e-09
GOTERM_CC_DIRECT	GO:0005783~endoplasmic reticulum	37	18.8776	1.23409e-10	RPL5, NRROS, RPL10, RPL34, RPLP0, LPCAT1, HSP90B1, EEF1B2, RPS3, CAPN2, SARAF, SLAMF7, RPL13, RPL18, GLUL, CLIC1, B2M, PDIA3, CAST, RPL21, HSPA5, RPS7, RPS8, RPS6, HLA-B, HLA-C, RPS3A, NBEAL2, PDIA6, EEF1D, RPL24, MAL, RPL27, CALR, PPIB, RPS24, RPS23	190	1185	20887	3.43246	3.61587e-08	2.41058e-09	2.09795e-09
GOTERM_MF_DIRECT	GO:0005515~protein binding	164	83.6735	2.17674e-10	SPON2, RPL5, RPL30, RPL3, RPL34, RPL10A, RPL8, RPL9, ACTB, RPL6, RPL7, RPS15, EEF1B2, RPS14, RPS19, RPL18A, RPS18, MYC, CFL1, CAPN2, RPL38, B2M, RPS10, GLUL, RPS13, RPS12, CAST, ZNF683, PDIA3, GBP5, RPS9, RPL21, RPS7, RPS8, RPS5, RPL22, RPS6, F2R, HLA-B, HLA-C, NOSIP, RPSA, CYBA, PDIA6, EEF1A1, MYL6, CD8B, S100A6, RPL24, MAL, RPL27, S100A4, RPL26, PFN1, PPIB, RPL28, ARL8A, LY6E, GYPC, SH2D2A, SP1…	190	12754	19304	1.30645	7.81451e-08	2.60484e-08	2.52502e-08
GOTERM_CC_DIRECT	GO:0005730~nucleolus	40	20.4082	2.31759e-10	RPL5, RPL3, RPL34, RPL12, RPL11, RPL7, RPS4X, RPS14, RPL7A, RPS15A, RNF213, RPS19, MYC, RPL36, RPS3, RPL35, RPL13, RPS27A, RPL18, RPS10, RPS13, RPS12, RPL19, NPM1, RPS9, RPS7, RPS8, RPS5, PYHIN1, RPS6, RPS3A, EEF1A1, RPS25, RPS28, ZEB2, RPS27, RPL27, RPL26, RPS24, RPS23	190	1400	20887	3.1409	6.79055e-08	4.2441e-09	3.69367e-09
GOTERM_BP_DIRECT	GO:0000028~ribosomal small subunit assembly	7	3.57143	3.11505e-09	RPS15, RPS14, RPS28, RPS27, RPS19, RPS5, RPSA	188	15	19734	48.9851	3.73806e-06	7.47613e-07	7.40137e-07
GOTERM_MF_DIRECT	GO:0019843~rRNA binding	9	4.59184	1.15105e-08	RPS4X, NPM1, RPS9, RPS18, RPS5, RPL37, RPS4Y1, RPL8, RPL9	190	45	19304	20.32	4.13228e-06	1.03307e-06	1.00142e-06
GOTERM_CC_DIRECT	GO:0009897~external side of plasma membrane	20	10.2041	1.37491e-08	CX3CR1, CD74, ITGA4, FCRL6, FCRL3, ITGB2, ANXA5, HLA-B, HLA-C, FASLG, TGFBR3, FCGR3A, PTPRC, SELL, CAPN2, SLAMF7, CCR7, CALR, IL7R, B2M	190	429	20887	5.12502	4.02847e-06	2.36969e-07	2.06236e-07
UP_KW_MOLECULAR_FUNCTION	KW-0699~rRNA-binding	8	4.08163	5.22324e-08	RPS4X, RPL5, RPS9, RPS18, RPL11, RPL37, RPS4Y1, RPL8	150	29	11889	21.8648	3.02948e-06	1.00983e-06	1.00983e-06
GOTERM_CC_DIRECT	GO:0009986~cell surface	23	11.7347	1.37961e-07	PDIA3, CX3CR1, CD74, NRROS, HSPA5, ITGA4, ANXA4, FCRL3, F2R, ITGB2, HLA-B, HLA-C, MSN, IQGAP2, TGFBR3, PTPRC, CD8B, CD38, CCR7, CD58, CALR, TIGIT, S100A10	190	657	20887	3.84844	4.04218e-05	2.2457e-06	1.95445e-06
GOTERM_MF_DIRECT	GO:0045296~cadherin binding	17	8.67347	2.07127e-07	CAST, HSPA5, RPL34, EEF2, RPL6, RPL7A, EEF1D, EFHD2, RPL14, RACK1, RPL24, EIF3E, LRRFIP1, RPL15, PFN1, RPL29, CLIC1	190	335	19304	5.15582	7.43557e-05	1.48717e-05	1.4416e-05
INTERPRO	IPR008991:Translation_prot_SH3-like_sf	6	3.06122	2.5427e-07	RPL21, RPL14, RPL27, RPL26, RPL8, RPL6	191	16	20607	40.4588	0.000175431	0.000175447	0.000173667
UP_KW_LIGAND	KW-0106~Calcium	22	11.2245	6.01027e-07	SPON2, ITGA4, ANXA4, ITGB2, ANXA5, ATP2B4, LPCAT1, MCOLN2, HSP90B1, SELL, SYT11, S100A6, EFHD2, ANXA6, CAPN2, SARAF, S100A4, LCP1, CALR, CALM1, TPT1, S100A11	49	984	6947	3.16978	1.02174e-05	1.02175e-05	1.02175e-05
GOTERM_BP_DIRECT	GO:0045727~positive regulation of translation	9	4.59184	9.97429e-07	RPS4X, RPL5, NPM1, RPS27, MYC, EIF3E, RPL26, EEF2, EIF4G3	188	81	19734	11.6631	0.0011962	0.000199486	0.000197491
UP_KW_BIOLOGICAL_PROCESS	KW-0945~Host-virus interaction	18	9.18367	1.34696e-06	ZNF683, CX3CR1, NPM1, HSPA5, HLA-B, HLA-C, MSN, RPSA, PSMB9, EEF1A1, PTPRC, RPS19, CFL1, RACK1, PABPC1, CALM1, HNRNPA1, LY6E	75	690	11450	3.98261	6.19582e-05	6.19601e-05	5.92662e-05
GOTERM_BP_DIRECT	GO:0042273~ribosomal large subunit biogenesis	7	3.57143	1.68092e-06	RPL5, NPM1, RPL11, RPL14, RPL35A, RPL26, RPL7	188	39	19734	18.8404	0.00201507	0.000288157	0.000285276
GOTERM_MF_DIRECT	GO:1990948~ubiquitin ligase inhibitor activity	5	2.55102	1.78523e-06	RPS15, RPL5, RPS7, RPL11, RPL37	190	10	19304	50.8	0.000640693	0.000106816	0.000103543
INTERPRO	IPR014722:Rib_uL2_dom2	6	3.06122	1.85869e-06	RPS4X, RPL14, RPL26, RPS4Y1, RPL8, RPL6	191	23	20607	28.1452	0.00128168	0.000505249	0.000500124
INTERPRO	IPR005824:KOW	5	2.55102	2.19674e-06	RPS4X, RPL14, RPL27, RPL26, RPS4Y1	191	11	20607	49.0409	0.0015146	0.000505249	0.000500124
GOTERM_MF_DIRECT	GO:0048027~mRNA 5'-UTR binding	6	3.06122	4.74913e-06	RPS14, RPL5, RPS7, RPS3A, RPL26, RPS13	190	26	19304	23.4462	0.00170349	0.000243563	0.0002361
GOTERM_CC_DIRECT	GO:0005634~nucleus	86	43.8776	4.85077e-06	RPL5, RPL30, RPL3, ZFAS1, RPLP0, FASLG, RPL10A, RPL9, ACTB, RPL6, RPL7, RPS15, RPL7A, RPS18, MYC, TMSB4X, CFL1, RACK1, ANXA6, CAPN2, LRRFIP1, CLIC1, GLUL, RPS13, EOMES, ZNF683, PDIA3, RPS9, RPS7, RPS8, ANXA4, RPL22, RPS6, PPP2R5A, NOSIP, RPS3A, RPSA, RHOC, COMMD6, ARL4C, EEF1A1, ZEB2, EEF1D, PALLD, S100A6, S100A4, RPL27, PABPC1, PFN1, PPIB, PFDN5, RPL10, SP140, TCF7, LEF1, RPS4Y1, HSP90B1, RPS3, …	190	6175	20887	1.53103	0.00142027	7.4804e-05	6.51025e-05
GOTERM_BP_DIRECT	GO:0006955~immune response	18	9.18367	6.70009e-06	IL32, CX3CR1, NRROS, FCRL6, FCRL3, GZMA, TCF7, HLA-B, HLA-C, FASLG, TNFRSF1B, TGFBR3, FCGR3A, CD8B, CCR7, LTB, IL7R, B2M	188	505	19734	3.74144	0.0080079	0.00100501	0.000994963
GOTERM_CC_DIRECT	GO:0005791~rough endoplasmic reticulum	6	3.06122	1.29367e-05	MYC, RPL27, RPL18, RPS21, RPL6, RPS23	190	34	20887	19.3997	0.0037833	0.000189523	0.000164943
GOTERM_BP_DIRECT	GO:0000027~ribosomal large subunit assembly	5	2.55102	2.15344e-05	RPL5, RPL10, RPL11, RPLP0, RPL6	188	18	19734	29.1578	0.0255106	0.00287126	0.00284255
GOTERM_BP_DIRECT	GO:0006414~translational elongation	5	2.55102	2.70753e-05	EEF1A1, EEF1B2, EEF1D, RPLP1, EEF2	188	19	19734	27.6232	0.0319687	0.00324904	0.00321655
GOTERM_MF_DIRECT	GO:0019901~protein kinase binding	17	8.67347	3.65173e-05	NPM1, RPS7, ITGB2, RPS6, ATP2B4, MSN, NBEAL2, RHOC, EEF2, ACTB, EEF1A1, FGR, PTPRC, RPS19, RPS3, PTPN7, CALM1	190	502	19304	3.44064	0.0130244	0.00163871	0.0015885
UP_SEQ_FEATURE	CROSSLNK:Glycyl lysine isopeptide (Lys-Gly) (interchain with G-Cter in SUMO1); alternate	10	5.10204	3.78634e-05	RPL5, NPM1, RPL3, HSPA5, ANXA5, BHLHE40, RPLP0, RPL13, RPL10A, EEF2	184	182	20569	6.1422	0.0289551	0.00979399	0.00973089
UP_KW_BIOLOGICAL_PROCESS	KW-0391~Immunity	18	9.18367	0.000105984	EOMES, PDIA3, ZNF683, CX3CR1, GBP5, CD74, SPON2, HLA-B, HLA-C, MCOLN2, PSMB9, FGR, FCGR3A, RNF213, CD8B, SLAMF7, GBP1, B2M	75	963	11450	2.85358	0.00486367	0.00243764	0.00233166
GOTERM_CC_DIRECT	GO:0036464~cytoplasmic ribonucleoprotein granule	7	3.57143	0.000107374	RPS4X, RPS6, RPLP0, PABPC1, RPL28, RPL6, ACTB	190	83	20887	9.27134	0.0309725	0.00149812	0.00130383
GOTERM_CC_DIRECT	GO:0034663~endoplasmic reticulum chaperone complex	4	2.04082	0.000114058	HSPA5, PPIB, PDIA6, HSP90B1	190	11	20887	39.9751	0.0328687	0.00151905	0.00132204
UP_SEQ_FEATURE	MOTIF:Prevents secretion from ER	6	3.06122	0.00015192	PDIA3, HSPA5, CALR, PPIB, PDIA6, HSP90B1	184	57	20569	11.7672	0.111214	0.0294725	0.0292826
GOTERM_MF_DIRECT	GO:0048306~calcium-dependent protein binding	7	3.57143	0.000153694	ANXA4, S100A6, ANXA6, S100A4, CALM1, S100A11, S100A10	190	82	19304	8.67317	0.0536857	0.00613069	0.00594284
GOTERM_BP_DIRECT	GO:0006413~translational initiation	6	3.06122	0.000171612	RPS5, RPS3, EIF3H, RPS3A, EIF3E, EIF4G3	188	55	19734	11.4511	0.186128	0.0187213	0.0185341
KEGG_PATHWAY	hsa04612:Antigen processing and presentation	8	4.08163	0.000228091	PDIA3, CD74, HSPA5, CD8B, HLA-B, HLA-C, CALR, B2M	138	80	8840	6.4058	0.0428532	0.0145978	0.0144458
GOTERM_BP_DIRECT	GO:0007159~leukocyte cell-cell adhesion	5	2.55102	0.000228142	PTPRC, SELL, ITGA4, ITGB2, MSN	188	32	19734	16.4013	0.239517	0.0228142	0.022586
INTERPRO	IPR002391:ANX4	3	1.53061	0.000252161	ANXA4, ANXA5, ANXA6	191	3	20607	107.89	0.159714	0.0434978	0.0430565
UP_SEQ_FEATURE	DOMAIN:EF-hand 1	9	4.59184	0.000287802	MYL6, LPCAT1, S100A6, CAPN2, EFHD2, S100A4, LCP1, CALM1, S100A11	184	188	20569	5.35156	0.200179	0.0429143	0.0426378
UP_SEQ_FEATURE	DOMAIN:EF-hand 2	9	4.59184	0.000331811	MYL6, LPCAT1, S100A6, CAPN2, EFHD2, S100A4, LCP1, CALM1, S100A11	184	192	20569	5.24006	0.22704	0.0429143	0.0426378
GOTERM_CC_DIRECT	GO:0032587~ruffle membrane	7	3.57143	0.000332451	EEF1A1, FGR, CFL1, PLEK, RPS3, SH3BGRL3, LCP1	190	102	20887	7.54432	0.092829	0.00423514	0.00368587
GOTERM_CC_DIRECT	GO:0005654~nucleoplasm	57	29.0816	0.000397221	RPL5, COX4I1, RPL8, ACTB, RPS4X, RPS15, RPS14, RPS19, RPS18, MYC, RACK1, RPS10, RPS13, RPS12, EOMES, RPS9, RPS7, RPS8, RPS5, RPS6, NOSIP, RPS3A, RPSA, FGR, ZEB2, EEF1D, S100A4, RPL27, RPL26, PPIB, TCF7, LEF1, RPL11, RPS4Y1, RPS15A, RPS3, TSPAN2, RPS27A, HNRNPA1, PTPN18, NPM1, PYHIN1, PSMB9, RPS25, RPS28, RPS27, ARPC2, RGS10, EIF3E, PTPN7, FAU, PTPN4, CALM1, IL7R, RPS21, RPS24, RPS23	190	4030	20887	1.55486	0.109889	0.0048494	0.00422047
GOTERM_MF_DIRECT	GO:0005509~calcium ion binding	19	9.69388	0.000400435	HSPA5, ANXA4, ANXA5, LPCAT1, HSP90B1, MYL6, SELL, SYT11, S100A6, EFHD2, ANXA6, CAPN2, S100A4, LCP1, CALR, CALM1, TPT1, S100A11, S100A10	190	746	19304	2.58767	0.133926	0.0143756	0.0139351
UP_SEQ_FEATURE	DOMAIN:EF-hand	9	4.59184	0.000435307	MYL6, LPCAT1, S100A6, CAPN2, EFHD2, S100A4, LCP1, CALM1, S100A11	184	200	20569	5.03046	0.286713	0.0452826	0.0449908
UP_KW_BIOLOGICAL_PROCESS	KW-0648~Protein biosynthesis	7	3.57143	0.000452322	EEF1A1, EEF1B2, EEF1D, EIF3H, EIF3E, EEF2, EIF4G3	75	153	11450	6.98475	0.0205964	0.0069356	0.00663405
UP_SEQ_FEATURE	DOMAIN:RNA-binding S4	3	1.53061	0.000466831	RPS4X, RPS9, RPS4Y1	184	4	20569	83.841	0.303958	0.0452826	0.0449908
GOTERM_CC_DIRECT	GO:0005853~eukaryotic translation elongation factor 1 complex	3	1.53061	0.000482882	EEF1A1, EEF1B2, EEF1D	190	4	20887	82.4487	0.131961	0.00565938	0.0049254
SMART	SM00054:EFh	8	4.08163	0.000510841	MYL6, LPCAT1, S100A6, EFHD2, S100A4, LCP1, CALM1, S100A11	102	149	10692	5.62811	0.0541733	0.0472691	0.0459681
GOTERM_BP_DIRECT	GO:0034975~protein folding in endoplasmic reticulum	4	2.04082	0.0005163	PDIA3, HSPA5, CALR, HSP90B1	188	17	19734	24.6984	0.461905	0.0476584	0.0471819
GOTERM_MF_DIRECT	GO:0045182~translation regulator activity	4	2.04082	0.000567702	RPS14, RPS9, RPL10, RACK1	190	17	19304	23.9059	0.184426	0.0185277	0.01796
GOTERM_CC_DIRECT	GO:0045121~membrane raft	9	4.59184	0.000693372	LDHB, PTPRC, ITGB2, CAPN2, EFHD2, ATP2B4, MAL, TNFRSF1B, S100A10	190	211	20887	4.68902	0.183908	0.00781377	0.00680038
KEGG_PATHWAY	hsa04514:Cell adhesion molecules	10	5.10204	0.00072198	PTPRC, SELL, ITGA4, CD8B, ITGB2, HLA-B, HLA-C, CD58, TIGIT, CD99	138	157	8840	4.08013	0.129485	0.0346551	0.0342941
INTERPRO	IPR002942:S4_RNA-bd	3	1.53061	0.000830355	RPS4X, RPS9, RPS4Y1	191	5	20607	64.734	0.436272	0.114589	0.113426
SMART	SM00363:S4	3	1.53061	0.000867323	RPS4X, RPS9, RPS4Y1	102	5	10692	62.8941	0.0902444	0.0472691	0.0459681
GOTERM_MF_DIRECT	GO:0005102~signaling receptor binding	12	6.12245	0.0010676	FGR, PTPRC, PIK3IP1, F2R, HLA-B, RACK1, HLA-C, MSN, FASLG, LTB, CD58, TIGIT	190	369	19304	3.30407	0.318509	0.0319389	0.0309603
INTERPRO	IPR011992:EF-hand-dom_pair	10	5.10204	0.00108709	MYL6, LPCAT1, S100A6, CAPN2, EFHD2, S100A4, LCP1, CALM1, S100A11, S100A10	191	276	20607	3.90906	0.52787	0.117154	0.115966
GOTERM_BP_DIRECT	GO:0043066~negative regulation of apoptotic process	14	7.14286	0.0011298	CD74, NPM1, HSPA5, RPL10, ANXA4, LEF1, RPS6, ANXA5, RPS3A, HSP90B1, MYC, CFL1, CD38, TPT1	188	507	19734	2.89853	0.742445	0.0968397	0.0958713
UP_SEQ_FEATURE	DOMAIN:S4 RNA-binding	3	1.53061	0.00115345	RPS4X, RPS9, RPS4Y1	184	6	20569	55.894	0.591634	0.0994527	0.0988119
GOTERM_CC_DIRECT	GO:0005886~plasma membrane	71	36.2245	0.001226	SPON2, NRROS, PLEK, ITGB2, LPCAT1, FASLG, ACTB, FCGR3A, ANXA6, CAPN2, CD38, CCR7, LRRFIP1, CLIC1, B2M, GLUL, CD52, ITGA4, FCRL6, ANXA4, F2R, HLA-B, PPP2R5A, HLA-C, RPSA, CYBA, EMP3, RHOC, TNFRSF1B, PDIA6, TGFBR3, ARL4C, FGR, EEF1A1, CD8B, PALLD, CDC42EP3, S100A6, LTB, LCP1, PPIB, ARL8A, LY6E, CX3CR1, GYPC, IQGAP2, RPS3, SLAMF7, TSPAN2, CD58, TIGIT, RPS27A, GBP1, CD99, S100A10, CD74, HSPA5, ATP2B4…	190	5592	20887	1.39577	0.301933	0.013055	0.0113619
INTERPRO	IPR036986:S4_RNA-bd_sf	3	1.53061	0.00123797	RPS4X, RPS9, RPS4Y1	191	6	20607	53.945	0.574602	0.117154	0.115966
GOTERM_CC_DIRECT	GO:0031982~vesicle	8	4.08163	0.00124758	MYL6, SYT11, CFL1, MSN, CALM1, RPS27A, CLIC1, ACTB	190	179	20887	4.91314	0.306337	0.013055	0.0113619
GOTERM_MF_DIRECT	GO:0003729~mRNA binding	10	5.10204	0.00137335	MYC, RPS5, RPS3, RPL24, RPL35, PABPC1, CALR, EIF4G3, RPS13, RPL7	190	269	19304	3.77695	0.389435	0.0379255	0.0367634
GOTERM_CC_DIRECT	GO:0005790~smooth endoplasmic reticulum	4	2.04082	0.00144833	RPL10, CALR, PPIB, HSP90B1	190	25	20887	17.5891	0.346013	0.0146331	0.0127353
GOTERM_BP_DIRECT	GO:0071353~cellular response to interleukin-4	4	2.04082	0.00146361	RPL3, HSPA5, TCF7, LEF1	188	24	19734	17.4947	0.827545	0.117089	0.115918
INTERPRO	IPR002048:EF_hand_dom	9	4.59184	0.00147342	MYL6, LPCAT1, S100A6, CAPN2, EFHD2, S100A4, LCP1, CALM1, S100A11	191	233	20607	4.16743	0.63847	0.117154	0.115966
INTERPRO	IPR001751:S100/CaBP7/8-like_CS	4	2.04082	0.0015281	S100A6, S100A4, S100A11, S100A10	191	25	20607	17.2624	0.651876	0.117154	0.115966
UP_SEQ_FEATURE	DOMAIN:KOW	3	1.53061	0.00160538	RPL14, RPL27, RPL26	184	7	20569	47.9092	0.712569	0.124577	0.123775
GOTERM_CC_DIRECT	GO:0042613~MHC class II protein complex	4	2.04082	0.00162641	CD74, HLA-B, HLA-C, B2M	190	26	20887	16.9126	0.379311	0.0158846	0.0138245
UP_KW_BIOLOGICAL_PROCESS	KW-0399~Innate immunity	10	5.10204	0.00165263	CX3CR1, FGR, ZNF683, SPON2, GBP5, HLA-B, HLA-C, SLAMF7, GBP1, MCOLN2	75	427	11450	3.57533	0.0732614	0.0190052	0.0181789
UP_SEQ_FEATURE	CROSSLNK:Glycyl lysine isopeptide (Lys-Gly) (interchain with G-Cter in ubiquitin)	10	5.10204	0.00180688	EEF1A1, RPL10, RPLP1, RPL12, RPLP0, RPS3, CYBA, RPS27A, RPS10, RPS13	184	308	20569	3.62948	0.754241	0.127467	0.126646
GOTERM_BP_DIRECT	GO:0002502~peptide antigen assembly with MHC class I protein complex	3	1.53061	0.0018179	PDIA3, CALR, B2M	188	7	19734	44.9863	0.88735	0.136343	0.134979
GOTERM_MF_DIRECT	GO:0051082~unfolded protein binding	7	3.57143	0.00199675	NPM1, HSPA5, NACA, CALR, PPIB, PFDN5, HSP90B1	190	133	19304	5.34737	0.512053	0.0512023	0.0496334
INTERPRO	IPR013787:S100_Ca-bd_sub	4	2.04082	0.00213283	S100A6, S100A4, S100A11, S100A10	191	28	20607	15.4129	0.770815	0.147165	0.145672
SMART	SM01394:S_100	4	2.04082	0.0022578	S100A6, S100A4, S100A11, S100A10	102	28	10692	14.9748	0.218373	0.0820333	0.0797755
GOTERM_CC_DIRECT	GO:0030667~secretory granule membrane	6	3.06122	0.00235954	PTPRC, SELL, HLA-B, HLA-C, CD58, IQGAP2	190	102	20887	6.46656	0.499507	0.0223014	0.0194091
GOTERM_CC_DIRECT	GO:0042470~melanosome	6	3.06122	0.00256775	PDIA3, HSPA5, ANXA6, PPIB, PDIA6, HSP90B1	190	104	20887	6.34221	0.529198	0.0235109	0.0204617
INTERPRO	IPR009000:Transl_B-barrel_sf	4	2.04082	0.00260778	EEF1A1, RPL3, RPL35A, EEF2	191	30	20607	14.3853	0.834985	0.163579	0.16192
GOTERM_CC_DIRECT	GO:0042612~MHC class I protein complex	3	1.53061	0.00281209	HLA-B, HLA-C, B2M	190	9	20887	36.6439	0.56181	0.0249679	0.0217298
GOTERM_BP_DIRECT	GO:0034113~heterotypic cell-cell adhesion	4	2.04082	0.00309623	PTPRC, ITGA4, ITGB2, CD58	188	31	19734	13.5443	0.975796	0.218471	0.216286
UP_KW_CELLULAR_COMPONENT	KW-0490~MHC I	3	1.53061	0.00336571	HLA-B, HLA-C, B2M	179	9	17942	33.4115	0.099237	0.0521685	0.0521685
GOTERM_BP_DIRECT	GO:0010628~positive regulation of gene expression	13	6.63265	0.00345854	ZNF683, IL32, CD74, RPL5, RPS7, LEF1, RPL11, MSN, TGFBR3, MYC, RPS3, CALR, IL7R	188	509	19734	2.68091	0.984353	0.218471	0.216286
GOTERM_CC_DIRECT	GO:0042824~MHC class I peptide loading complex	3	1.53061	0.00349423	PDIA3, CALR, B2M	190	10	20887	32.9795	0.64142	0.0301121	0.0262068
GOTERM_MF_DIRECT	GO:0003746~translation elongation factor activity	4	2.04082	0.00371783	EEF1A1, EEF1B2, EEF1D, EEF2	190	32	19304	12.7	0.737417	0.0889801	0.0862537
GOTERM_BP_DIRECT	GO:1904667~negative regulation of ubiquitin protein ligase activity	3	1.53061	0.00382324	RPL5, RPS7, RPL11	188	10	19734	31.4904	0.989915	0.218471	0.216286
GOTERM_BP_DIRECT	GO:1901798~positive regulation of signal transduction by p53 class mediator	3	1.53061	0.00382324	RPS15, RPL11, RPL37	188	10	19734	31.4904	0.989915	0.218471	0.216286
GOTERM_BP_DIRECT	GO:0070493~thrombin-activated receptor signaling pathway	3	1.53061	0.00382324	F2R, PLEK, IQGAP2	188	10	19734	31.4904	0.989915	0.218471	0.216286
GOTERM_CC_DIRECT	GO:0098553~lumenal side of endoplasmic reticulum membrane	4	2.04082	0.00385716	CD74, HLA-B, HLA-C, CALR	190	35	20887	12.5636	0.677719	0.0307529	0.0267645
GOTERM_CC_DIRECT	GO:0032991~protein-containing complex	15	7.65306	0.00385918	CD74, RPL5, NPM1, RPL3, HSPA5, RPL10, RPS7, PYHIN1, RPL11, ATP2B4, ACTB, HSP90B1, MYC, CALM1, PPIB	190	684	20887	2.41078	0.677911	0.0307529	0.0267645
GOTERM_CC_DIRECT	GO:0055038~recycling endosome membrane	6	3.06122	0.00395795	PDIA3, SYT11, HLA-B, HLA-C, B2M, MCOLN2	190	115	20887	5.73556	0.687134	0.0307529	0.0267645
GOTERM_CC_DIRECT	GO:0048471~perinuclear region of cytoplasm	16	8.16327	0.00398843	CX3CR1, GBP5, ANXA4, RPS6, MSN, FASLG, TNFRSF1B, HSP90B1, S100A6, ANXA6, RACK1, S100A4, LCP1, CALR, PPIB, CLIC1	190	761	20887	2.31131	0.689927	0.0307529	0.0267645
UP_KW_DOMAIN	KW-0041~Annexin	3	1.53061	0.00408613	ANXA4, ANXA5, ANXA6	102	14	14597	30.666	0.0861411	0.0898949	0.0898949
GOTERM_CC_DIRECT	GO:0015629~actin cytoskeleton	9	4.59184	0.00414999	FGR, ARPC2, PALLD, CFL1, CDC42EP3, LCP1, IQGAP2, GBP1, ACTB	190	281	20887	3.52094	0.704319	0.0311781	0.0271345
INTERPRO	IPR004038:Ribosomal_eL8/eL30/eS12/Gad45	3	1.53061	0.00440344	RPL7A, RPL30, RPS12	191	11	20607	29.4246	0.952408	0.253198	0.250629
UP_KW_LIGAND	KW-0111~Calcium/phospholipid-binding	3	1.53061	0.00463531	ANXA4, ANXA5, ANXA6	49	15	6947	28.3551	0.0759448	0.0394001	0.0394001
GOTERM_CC_DIRECT	GO:0012506~vesicle membrane	4	2.04082	0.00487398	ANXA4, ANXA5, ANXA6, GBP1	190	38	20887	11.5717	0.761066	0.0357019	0.0310716
GOTERM_MF_DIRECT	GO:0050998~nitric-oxide synthase binding	3	1.53061	0.00494837	CD74, ATP2B4, ACTB	190	11	19304	27.7091	0.831509	0.111029	0.107627
SMART	SM00194:PTPc	4	2.04082	0.00503623	PTPN18, PTPRC, PTPN7, PTPN4	102	37	10692	11.3323	0.423244	0.137237	0.13346
INTERPRO	IPR011332:Ribosomal_zn-bd	3	1.53061	0.0052522	RPS27, RPL37, RPS27A	191	12	20607	26.9725	0.973578	0.274256	0.271474
GOTERM_BP_DIRECT	GO:0045060~negative thymic T cell selection	3	1.53061	0.00553799	CD74, PTPRC, CCR7	188	12	19734	26.242	0.998724	0.302072	0.299051
KEGG_PATHWAY	hsa05132:Salmonella infection	11	5.61224	0.00555099	PTPRC, ARPC2, MYC, TCF7, LEF1, RPS3, PFN1, ARL8A, ACTB, HSP90B1, S100A10	138	251	8840	2.80732	0.656566	0.213158	0.210938
UP_KW_MOLECULAR_FUNCTION	KW-0251~Elongation factor	4	2.04082	0.0055519	EEF1A1, EEF1B2, EEF1D, EEF2	150	29	11889	10.9324	0.275959	0.0805026	0.0805026
UP_KW_BIOLOGICAL_PROCESS	KW-1064~Adaptive immunity	10	5.10204	0.00561017	EOMES, CX3CR1, PDIA3, ZNF683, CD74, CD8B, HLA-B, HLA-C, SLAMF7, MCOLN2	75	513	11450	2.97596	0.228018	0.0516136	0.0493695
GOTERM_BP_DIRECT	GO:0043123~positive regulation of canonical NF-kappaB signal transduction	8	4.08163	0.00603217	CX3CR1, CD74, F2R, S100A4, CCR7, FASLG, LTB, RHOC	188	227	19734	3.69932	0.999297	0.314722	0.311575
GOTERM_BP_DIRECT	GO:0050767~regulation of neurogenesis	4	2.04082	0.00639464	CX3CR1, LEF1, BHLHE40, S100A10	188	40	19734	10.4968	0.999546	0.319732	0.316534
UP_SEQ_FEATURE	REPEAT:Annexin 4	3	1.53061	0.00667747	ANXA4, ANXA5, ANXA6	184	14	20569	23.9546	0.994478	0.345448	0.343222
UP_SEQ_FEATURE	REPEAT:Annexin 2	3	1.53061	0.00667747	ANXA4, ANXA5, ANXA6	184	14	20569	23.9546	0.994478	0.345448	0.343222
UP_SEQ_FEATURE	REPEAT:Annexin 3	3	1.53061	0.00667747	ANXA4, ANXA5, ANXA6	184	14	20569	23.9546	0.994478	0.345448	0.343222
UP_SEQ_FEATURE	REPEAT:Annexin 1	3	1.53061	0.00667747	ANXA4, ANXA5, ANXA6	184	14	20569	23.9546	0.994478	0.345448	0.343222
INTERPRO	IPR000242:PTP_cat	4	2.04082	0.00680129	PTPN18, PTPRC, PTPN7, PTPN4	191	42	20607	10.2752	0.990985	0.274256	0.271474
GOTERM_BP_DIRECT	GO:0001916~positive regulation of T cell mediated cytotoxicity	4	2.04082	0.00685201	PTPRC, HLA-B, HLA-C, B2M	188	41	19734	10.2408	0.999739	0.328897	0.325608
GOTERM_MF_DIRECT	GO:0004726~non-membrane spanning protein tyrosine phosphatase activity	3	1.53061	0.006928	PTPN18, PTPN7, PTPN4	190	13	19304	23.4462	0.91757	0.146303	0.14182
INTERPRO	IPR001464:Annexin	3	1.53061	0.00715451	ANXA4, ANXA5, ANXA6	191	14	20607	23.1193	0.992947	0.274256	0.271474
INTERPRO	IPR037104:Annexin_sf	3	1.53061	0.00715451	ANXA4, ANXA5, ANXA6	191	14	20607	23.1193	0.992947	0.274256	0.271474
INTERPRO	IPR018252:Annexin_repeat_CS	3	1.53061	0.00715451	ANXA4, ANXA5, ANXA6	191	14	20607	23.1193	0.992947	0.274256	0.271474
INTERPRO	IPR018502:Annexin_repeat	3	1.53061	0.00715451	ANXA4, ANXA5, ANXA6	191	14	20607	23.1193	0.992947	0.274256	0.271474
SMART	SM00335:ANX	3	1.53061	0.00746683	ANXA4, ANXA5, ANXA6	102	14	10692	22.4622	0.558218	0.162777	0.158297
GOTERM_CC_DIRECT	GO:0030670~phagocytic vesicle membrane	5	2.55102	0.00774761	HLA-B, HLA-C, CYBA, CALR, B2M	190	86	20887	6.39137	0.897602	0.055367	0.0481863
GOTERM_BP_DIRECT	GO:0050821~protein stabilization	8	4.08163	0.00789106	CD74, RPL5, RPS7, PYHIN1, RPL11, CALR, PFN1, PPIB	188	239	19734	3.51358	0.999926	0.364203	0.360561
INTERPRO	IPR029064:Ribosomal_eL30-like_sf	3	1.53061	0.00820543	RPL7A, RPL30, RPS12	191	15	20607	21.578	0.996604	0.297987	0.294964
GOTERM_BP_DIRECT	GO:0051603~proteolysis involved in protein catabolic process	4	2.04082	0.0088729	HSPA5, GZMA, CAPN2, PSMB9	188	45	19734	9.3305	0.999977	0.394351	0.390408
GOTERM_CC_DIRECT	GO:0005615~extracellular space	30	15.3061	0.00924111	NRROS, FASLG, ACTB, FCGR3A, GNLY, CFL1, RPS27A, RPL39, CLIC1, B2M, S100A11, S100A10, IL32, PDIA3, GZMA, HLA-B, HLA-C, MSN, PDIA6, TGFBR3, EEF1A1, SELL, PIK3IP1, S100A6, S100A4, LTB, FAU, LCP1, CALR, TPT1	190	2033	20887	1.62221	0.934141	0.0644677	0.0561067
UP_KW_PTM	KW-0013~ADP-ribosylation	7	3.57143	0.00932934	NPM1, RPS6, RPL24, RPS3A, EEF2, RHOC, RPS27A	175	147	14252	3.8781	0.186337	0.0479084	0.0479084
KEGG_PATHWAY	hsa04810:Regulation of actin cytoskeleton	10	5.10204	0.00938355	ITGA4, ARPC2, TMSB4X, CFL1, F2R, ITGB2, MSN, PFN1, IQGAP2, ACTB	138	230	8840	2.78513	0.83637	0.300274	0.297146
GOTERM_BP_DIRECT	GO:0030890~positive regulation of B cell proliferation	4	2.04082	0.0094268	CD74, PTPRC, FCRL3, CD38	188	46	19734	9.12766	0.999988	0.404006	0.399966
GOTERM_BP_DIRECT	GO:0042100~B cell proliferation	4	2.04082	0.0100005	PTPRC, LEF1, CD38, IL7R	188	47	19734	8.93345	0.999994	0.413812	0.409674
UP_KW_PTM	KW-0597~Phosphoprotein	119	60.7143	0.0104149	RPL5, RPL30, RPL3, RPL32, RPL34, RPL10A, RPL6, RPL7, EEF1B2, RPS14, RPL18A, MYC, CFL1, RPL35, RPL37, RPS10, GLUL, RPS13, CAST, PDIA3, EOMES, RPS9, RPS8, RPS5, RPL22, RPS6, F2R, HLA-B, HLA-C, NOSIP, RPSA, CYBA, PDIA6, EEF1A1, MYL6, CD8B, S100A6, RPL24, RPL26, RPL29, PFN1, RPL28, GYPC, SH2D2A, SP140, IQGAP2, HSP90B1, LDHB, RNF213, S100A11, CD99, BTF3, HSPA5, MSN, NBEAL2, EEF2, RPS28, RPS27, PTPRC, …	175	8417	14252	1.1514	0.205727	0.0479084	0.0479084
UP_KW_MOLECULAR_FUNCTION	KW-0143~Chaperone	9	4.59184	0.0104383	BTF3, CD74, NPM1, HSPA5, NACA, CALR, PDIA6, PFDN5, HSP90B1	150	239	11889	2.98469	0.455889	0.121084	0.121084
UP_SEQ_FEATURE	COMPBIAS:Basic residues	14	7.14286	0.0110583	RPS8, SP140, HLA-B, RPL6, EEF1D, CALR, FAU, RPL15, PFN1, RPL29, RPL18, EIF4G3, RPS24, RPS23	184	709	20569	2.20738	0.999821	0.536327	0.532872
GOTERM_BP_DIRECT	GO:0070527~platelet aggregation	4	2.04082	0.0112076	PDIA3, PLEK, CLIC1, ACTB	188	49	19734	8.56882	0.999999	0.448304	0.443821
UP_SEQ_FEATURE	DOMAIN:Immunoglobulin C1-set	3	1.53061	0.0121875	HLA-B, HLA-C, B2M	184	19	20569	17.6507	0.999926	0.556325	0.552741
GOTERM_BP_DIRECT	GO:0030838~positive regulation of actin filament polymerization	4	2.04082	0.0124952	ARPC2, CDC42EP3, CCR7, PFN1	188	51	19734	8.23279	1	0.483687	0.47885
GOTERM_BP_DIRECT	GO:0006417~regulation of translation	5	2.55102	0.0136606	RPS14, RPS9, RPL10, RPS3, RPL38	188	97	19734	5.41073	1	0.504152	0.499111
GOTERM_BP_DIRECT	GO:0097191~extrinsic apoptotic signaling pathway	4	2.04082	0.0138642	PDIA3, PTPRC, FASLG, TNFRSF1B	188	53	19734	7.92212	1	0.504152	0.499111
GOTERM_CC_DIRECT	GO:0042589~zymogen granule membrane	3	1.53061	0.0139036	ANXA4, ANXA5, ANXA6	190	20	20887	16.4897	0.983466	0.0947383	0.0824514
GOTERM_BP_DIRECT	GO:0050901~leukocyte tethering or rolling	3	1.53061	0.0151705	CX3CR1, SELL, ITGA4	188	20	19734	15.7452	1	0.53543	0.530076
BIOCARTA	h_lymphocytePathway:Adhesion Molecules on Lymphocyte	3	1.53061	0.0156194	SELL, ITGA4, ITGB2	37	9	1623	14.6216	0.792842	0.736597	0.736597
GOTERM_CC_DIRECT	GO:0012507~ER to Golgi transport vesicle membrane	4	2.04082	0.0163608	CD74, HLA-B, HLA-C, B2M	190	59	20887	7.45299	0.99204	0.108948	0.0948183
GOTERM_BP_DIRECT	GO:0030490~maturation of SSU-rRNA	3	1.53061	0.016664	RPS14, RPS28, RPS19	188	21	19734	14.9954	1	0.556361	0.550797
GOTERM_BP_DIRECT	GO:0071346~cellular response to type II interferon	5	2.55102	0.0166908	GBP5, FASLG, CD58, CALM1, GBP1	188	103	19734	5.09554	1	0.556361	0.550797
GOTERM_MF_DIRECT	GO:0005544~calcium-dependent phospholipid binding	4	2.04082	0.0166946	SYT11, ANXA4, ANXA5, ANXA6	190	55	19304	7.38909	0.997628	0.332964	0.322761
KEGG_PATHWAY	hsa05170:Human immunodeficiency virus 1 infection	9	4.59184	0.0175693	PDIA3, CFL1, HLA-B, HLA-C, FASLG, CALR, CALM1, TNFRSF1B, B2M	138	213	8840	2.70667	0.966737	0.481902	0.476882
UP_SEQ_FEATURE	DOMAIN:Elongation factor 1 beta central acidic region eukaryote	2	1.02041	0.017715	EEF1B2, EEF1D	184	2	20569	111.788	0.999999	0.72352	0.718858
UP_SEQ_FEATURE	DOMAIN:Translation elongation factor EF1B beta/delta subunit guanine nucleotide exchange	2	1.02041	0.017715	EEF1B2, EEF1D	184	2	20569	111.788	0.999999	0.72352	0.718858
GOTERM_CC_DIRECT	GO:0101003~ficolin-1-rich granule membrane	4	2.04082	0.0178774	ITGB2, NBEAL2, CD58, ARL8A	190	61	20887	7.20863	0.994935	0.116402	0.101305
GOTERM_MF_DIRECT	GO:0019900~kinase binding	5	2.55102	0.0179886	EEF1A1, LDHB, FCRL3, RPS3, PPP2R5A	190	102	19304	4.98039	0.998521	0.33989	0.329475
GOTERM_BP_DIRECT	GO:2000059~negative regulation of ubiquitin-dependent protein catabolic process	3	1.53061	0.0182175	RPL5, RPS7, RPL11	188	22	19734	14.3138	1	0.579125	0.573333
INTERPRO	IPR038716:P1/P2_N_sf	2	1.02041	0.0183558	RPLP1, RPLP2	191	2	20607	107.89	0.999997	0.469092	0.464333
INTERPRO	IPR001326:Transl_elong_EF1B_B/D_CS	2	1.02041	0.0183558	EEF1B2, EEF1D	191	2	20607	107.89	0.999997	0.469092	0.464333
INTERPRO	IPR014038:EF1B_bsu/dsu_GNE	2	1.02041	0.0183558	EEF1B2, EEF1D	191	2	20607	107.89	0.999997	0.469092	0.464333
INTERPRO	IPR036219:eEF-1beta-like_sf	2	1.02041	0.0183558	EEF1B2, EEF1D	191	2	20607	107.89	0.999997	0.469092	0.464333
INTERPRO	IPR018940:EF-1_beta_acid_region_euk	2	1.02041	0.0183558	EEF1B2, EEF1D	191	2	20607	107.89	0.999997	0.469092	0.464333
INTERPRO	IPR002392:ANX5	2	1.02041	0.0183558	ANXA4, ANXA5	191	2	20607	107.89	0.999997	0.469092	0.464333
INTERPRO	IPR049720:EF1B_bsu/dsu	2	1.02041	0.0183558	EEF1B2, EEF1D	191	2	20607	107.89	0.999997	0.469092	0.464333
INTERPRO	IPR027534:Ribosomal_P1/P2	2	1.02041	0.0183558	RPLP1, RPLP2	191	2	20607	107.89	0.999997	0.469092	0.464333
UP_KW_CELLULAR_COMPONENT	KW-0256~Endoplasmic reticulum	23	11.7347	0.0183764	PDIA3, CD74, NRROS, RPL21, HSPA5, RPL34, HLA-B, LPCAT1, HLA-C, NBEAL2, PDIA6, RPL6, HSP90B1, RPS28, SARAF, RPL27, CALR, PPIB, RPL18, GLUL, CLIC1, RPS21, RPS23	179	1380	17942	1.67058	0.437277	0.189889	0.189889
SMART	SM01182:EF-1_beta_acid	2	1.02041	0.0188043	EEF1B2, EEF1D	102	2	10692	104.824	0.873711	0.292809	0.28475
SMART	SM00888:EF1_GNE	2	1.02041	0.0188043	EEF1B2, EEF1D	102	2	10692	104.824	0.873711	0.292809	0.28475
GOTERM_BP_DIRECT	GO:0002182~cytoplasmic translational elongation	2	1.02041	0.0188627	EEF1D, RPLP2	188	2	19734	104.968	1	0.579125	0.573333
GOTERM_BP_DIRECT	GO:1905551~negative regulation of protein localization to endoplasmic reticulum	2	1.02041	0.0188627	BTF3, NACA	188	2	19734	104.968	1	0.579125	0.573333
GOTERM_BP_DIRECT	GO:0031640~killing of cells of another organism	4	2.04082	0.0193042	RPL30, RPS19, GNLY, GZMA	188	60	19734	6.99787	1	0.579125	0.573333
GOTERM_BP_DIRECT	GO:0061844~antimicrobial humoral immune response mediated by antimicrobial peptide	5	2.55102	0.0201114	RPL30, RPS19, GNLY, FAU, RPL39	188	109	19734	4.81505	1	0.588626	0.582739
INTERPRO	IPR003595:Tyr_Pase_cat	4	2.04082	0.0204459	PTPN18, PTPRC, PTPN7, PTPN4	191	63	20607	6.85016	0.999999	0.503846	0.498734
SMART	SM00404:PTPc_motif	4	2.04082	0.0215856	PTPN18, PTPRC, PTPN7, PTPN4	102	63	10692	6.65546	0.907319	0.294104	0.286009
KEGG_PATHWAY	hsa05416:Viral myocarditis	5	2.55102	0.0219728	ITGB2, HLA-B, HLA-C, EIF4G3, ACTB	138	69	8840	4.64188	0.98596	0.527348	0.521855
GOTERM_BP_DIRECT	GO:0006457~protein folding	6	3.06122	0.0225672	PDIA3, CALR, PPIB, PDIA6, PFDN5, HSP90B1	188	169	19734	3.72668	1	0.635054	0.628704
GOTERM_BP_DIRECT	GO:0008284~positive regulation of cell population proliferation	11	5.61224	0.0227561	RPS4X, NPM1, RPS9, RPS15A, MYC, RPS6, F2R, FASLG, CALR, IL7R, ACTB	188	506	19734	2.28191	1	0.635054	0.628704
BIOCARTA	h_mhcPathway:Antigen Processing and Presentation	3	1.53061	0.023207	CD74, B2M, PSMB9	37	11	1623	11.9631	0.904445	0.736597	0.736597
BIOCARTA	h_monocytePathway:Monocyte and its Surface Molecules	3	1.53061	0.023207	SELL, ITGA4, ITGB2	37	11	1623	11.9631	0.904445	0.736597	0.736597
UP_SEQ_FEATURE	DOMAIN:Tyrosine specific protein phosphatases	4	2.04082	0.024544	PTPN18, PTPRC, PTPN7, PTPN4	184	70	20569	6.38789	1	0.952306	0.94617
GOTERM_BP_DIRECT	GO:0006470~protein dephosphorylation	5	2.55102	0.0252999	PTPN18, PTPRC, PPP2R5A, PTPN7, PTPN4	188	117	19734	4.48582	1	0.689998	0.683098
UP_KW_MOLECULAR_FUNCTION	KW-0694~RNA-binding	17	8.67347	0.0259496	RPL5, NPM1, RPS9, RPL12, RPL22, RPL11, RPL35A, RPS4Y1, RPL8, RPL7, RPS4X, RPS18, RPS3, PABPC1, RPL37, HNRNPA1, EIF4G3	150	751	11889	1.79417	0.782368	0.250846	0.250846
INTERPRO	IPR018247:EF_Hand_1_Ca_BS	6	3.06122	0.0263723	S100A6, CAPN2, S100A4, LCP1, CALM1, S100A11	191	181	20607	3.57647	1	0.511114	0.505929
GOTERM_CC_DIRECT	GO:0001891~phagocytic cup	3	1.53061	0.0263869	SYT11, RACK1, LCP1	190	28	20887	11.7784	0.999604	0.168073	0.146275
UP_SEQ_FEATURE	DOMAIN:MHC class I alpha chain C-terminal	2	1.02041	0.0264552	HLA-B, HLA-C	184	3	20569	74.5254	1	0.973269	0.966998
INTERPRO	IPR038237:Ribosomal_eS4_central_sf	2	1.02041	0.0274076	RPS4X, RPS4Y1	191	3	20607	71.9267	1	0.511114	0.505929
INTERPRO	IPR018199:Ribosomal_eS4_N_CS	2	1.02041	0.0274076	RPS4X, RPS4Y1	191	3	20607	71.9267	1	0.511114	0.505929
INTERPRO	IPR032277:Ribosomal_eS4_C	2	1.02041	0.0274076	RPS4X, RPS4Y1	191	3	20607	71.9267	1	0.511114	0.505929
INTERPRO	IPR014717:Transl_elong_EF1B/ribsomal_bS6	2	1.02041	0.0274076	EEF1B2, EEF1D	191	3	20607	71.9267	1	0.511114	0.505929
INTERPRO	IPR041982:Ribosomal_eS4_KOW	2	1.02041	0.0274076	RPS4X, RPS4Y1	191	3	20607	71.9267	1	0.511114	0.505929
INTERPRO	IPR013843:Ribosomal_eS4_N	2	1.02041	0.0274076	RPS4X, RPS4Y1	191	3	20607	71.9267	1	0.511114	0.505929
INTERPRO	IPR000876:Ribosomal_eS4	2	1.02041	0.0274076	RPS4X, RPS4Y1	191	3	20607	71.9267	1	0.511114	0.505929
INTERPRO	IPR013845:Ribosomal_eS4_central_region	2	1.02041	0.0274076	RPS4X, RPS4Y1	191	3	20607	71.9267	1	0.511114	0.505929
GOTERM_BP_DIRECT	GO:1990145~maintenance of translational fidelity	2	1.02041	0.028161	RPS23, RPS12	188	3	19734	69.9787	1	0.750959	0.74345
GOTERM_BP_DIRECT	GO:0019722~calcium-mediated signaling	5	2.55102	0.028916	CX3CR1, FCGR3A, CCR7, NMUR1, MCOLN2	188	122	19734	4.30197	1	0.754331	0.746788
GOTERM_MF_DIRECT	GO:0046977~TAP binding	2	1.02041	0.029087	HLA-B, HLA-C	190	3	19304	67.7333	0.999975	0.522112	0.506114
UP_SEQ_FEATURE	CARBOHYD:O-linked (GalNAc...) serine	4	2.04082	0.0293242	CD74, GYPC, PIK3IP1, TNFRSF1B	184	75	20569	5.96203	1	0.973269	0.966998
GOTERM_BP_DIRECT	GO:0035458~cellular response to interferon-beta	3	1.53061	0.0306674	PYHIN1, CAPN2, CALM1	188	29	19734	10.8588	1	0.782997	0.775167
KEGG_PATHWAY	hsa05140:Leishmaniasis	5	2.55102	0.0313166	EEF1A1, FCGR3A, ITGA4, ITGB2, CYBA	138	77	8840	4.15961	0.997777	0.611816	0.605443
GOTERM_CC_DIRECT	GO:0030027~lamellipodium	6	3.06122	0.0324021	ARPC2, PALLD, CFL1, PABPC1, IQGAP2, ACTB	190	195	20887	3.38251	0.999936	0.201996	0.175799
UP_SEQ_FEATURE	DOMAIN:Tyrosine-protein phosphatase	4	2.04082	0.0324114	PTPN18, PTPRC, PTPN7, PTPN4	184	78	20569	5.73272	1	0.973269	0.966998
GOTERM_MF_DIRECT	GO:0001786~phosphatidylserine binding	4	2.04082	0.0324906	SYT11, ANXA4, ANXA5, ANXA6	190	71	19304	5.72394	0.999993	0.551799	0.534892
GOTERM_BP_DIRECT	GO:2001238~positive regulation of extrinsic apoptotic signaling pathway	3	1.53061	0.0326567	PDIA3, PTPRC, LTB	188	30	19734	10.4968	1	0.799757	0.79176
GOTERM_BP_DIRECT	GO:0030866~cortical actin cytoskeleton organization	3	1.53061	0.0326567	PLEK, LCP1, CALR	188	30	19734	10.4968	1	0.799757	0.79176
GOTERM_MF_DIRECT	GO:0031625~ubiquitin protein ligase binding	8	4.08163	0.033815	RPL5, HSPA5, SYT11, PYHIN1, RPL11, CALR, RPS27A, TNFRSF1B	190	311	19304	2.6135	0.999996	0.551799	0.534892
KEGG_PATHWAY	hsa04670:Leukocyte transendothelial migration	6	3.06122	0.0339772	ITGA4, ITGB2, MSN, CYBA, CD99, ACTB	138	116	8840	3.31334	0.998689	0.611816	0.605443
INTERPRO	IPR016130:Tyr_Pase_AS	4	2.04082	0.0343251	PTPN18, PTPRC, PTPN7, PTPN4	191	77	20607	5.60468	1	0.612187	0.605977
GOTERM_BP_DIRECT	GO:0006446~regulation of translational initiation	3	1.53061	0.0346954	EIF3H, EIF3E, EIF4G3	188	31	19734	10.1582	1	0.83269	0.824363
KEGG_PATHWAY	hsa04145:Phagosome	7	3.57143	0.035052	FCGR3A, ITGB2, HLA-B, HLA-C, CYBA, CALR, ACTB	138	157	8840	2.85609	0.998941	0.611816	0.605443
UP_SEQ_FEATURE	SITE:Lowers pKa of C-terminal Cys of second active site	2	1.02041	0.0351179	PDIA3, PDIA6	184	4	20569	55.894	1	0.973269	0.966998
UP_SEQ_FEATURE	SITE:Lowers pKa of C-terminal Cys of first active site	2	1.02041	0.0351179	PDIA3, PDIA6	184	4	20569	55.894	1	0.973269	0.966998
UP_SEQ_FEATURE	DOMAIN:CTNNB1 binding N-teminal	2	1.02041	0.0351179	TCF7, LEF1	184	4	20569	55.894	1	0.973269	0.966998
UP_SEQ_FEATURE	REGION:CTNNB1-binding	2	1.02041	0.0351179	TCF7, LEF1	184	4	20569	55.894	1	0.973269	0.966998
UP_SEQ_FEATURE	REGION:VL9 epitope	2	1.02041	0.0351179	HLA-B, HLA-C	184	4	20569	55.894	1	0.973269	0.966998
GOTERM_CC_DIRECT	GO:0106139~symbiont cell surface	2	1.02041	0.035709	GBP5, GBP1	190	4	20887	54.9658	0.999976	0.217974	0.189704
INTERPRO	IPR012678:Ribosomal_uL23/eL15/eS24_sf	2	1.02041	0.0363763	RPL15, RPS24	191	4	20607	53.945	1	0.612187	0.605977
INTERPRO	IPR013558:CTNNB1-bd_N	2	1.02041	0.0363763	TCF7, LEF1	191	4	20607	53.945	1	0.612187	0.605977
INTERPRO	IPR024940:TCF/LEF	2	1.02041	0.0363763	TCF7, LEF1	191	4	20607	53.945	1	0.612187	0.605977
GOTERM_BP_DIRECT	GO:0042254~ribosome biogenesis	3	1.53061	0.0367822	RPS28, RPLP0, GLUL	188	32	19734	9.84076	1	0.86242	0.853796
BIOCARTA	h_lymPathway:Adhesion and Diapedesis of Lymphocytes	3	1.53061	0.0368298	SELL, ITGA4, ITGB2	37	14	1623	9.39961	0.976541	0.736597	0.736597
BIOCARTA	h_ctlPathway:CTL mediated immune response against target cells	3	1.53061	0.0368298	ITGB2, FASLG, B2M	37	14	1623	9.39961	0.976541	0.736597	0.736597
GOTERM_CC_DIRECT	GO:0030175~filopodium	4	2.04082	0.0372113	ARL4C, MSN, LCP1, IQGAP2	190	81	20887	5.42872	0.999985	0.222508	0.193651
GOTERM_BP_DIRECT	GO:0014005~microglia development	2	1.02041	0.0373715	NRROS, TSPAN2	188	4	19734	52.484	1	0.86242	0.853796
GOTERM_MF_DIRECT	GO:0008201~heparin binding	6	3.06122	0.0378201	TGFBR3, PTPRC, SELL, RPL22, ANXA6, RPL29	190	188	19304	3.24255	0.999999	0.577186	0.559501
GOTERM_MF_DIRECT	GO:0043022~ribosome binding	4	2.04082	0.0385862	HSPA5, RACK1, RPSA, EEF2	190	76	19304	5.34737	0.999999	0.577186	0.559501
GOTERM_BP_DIRECT	GO:0006919~activation of cysteine-type endopeptidase activity involved in apoptotic process	4	2.04082	0.0391983	RPS27, F2R, RACK1, FASLG	188	79	19734	5.31484	1	0.887508	0.878633
GOTERM_BP_DIRECT	GO:0071345~cellular response to cytokine stimulus	3	1.53061	0.0410961	ITGA4, LEF1, CCR7	188	34	19734	9.26189	1	0.913247	0.904114
UP_KW_LIGAND	KW-0342~GTP-binding	7	3.57143	0.0434263	EEF1A1, ARL4C, GBP5, EEF2, RHOC, GBP1, ARL8A	49	376	6947	2.63944	0.529875	0.246082	0.246082
GOTERM_CC_DIRECT	GO:0005854~nascent polypeptide-associated complex	2	1.02041	0.0444362	BTF3, NACA	190	5	20887	43.9726	0.999998	0.260396	0.226625
INTERPRO	IPR005788:PDI_thioredoxin-like_dom	2	1.02041	0.0452628	PDIA3, PDIA6	191	5	20607	43.156	1	0.743604	0.73606
GOTERM_BP_DIRECT	GO:1902164~positive regulation of DNA damage response, signal transduction by p53 class mediator resulting in transcription of p21 class mediator	2	1.02041	0.0464953	PYHIN1, RPL26	188	5	19734	41.9872	1	0.961972	0.952352
GOTERM_BP_DIRECT	GO:0140639~positive regulation of pyroptotic inflammatory response	2	1.02041	0.0464953	GBP5, GBP1	188	5	19734	41.9872	1	0.961972	0.952352
GOTERM_BP_DIRECT	GO:2000435~negative regulation of protein neddylation	2	1.02041	0.0464953	RPL5, RPL11	188	5	19734	41.9872	1	0.961972	0.952352
GOTERM_BP_DIRECT	GO:0051208~sequestering of calcium ion	2	1.02041	0.0464953	CALR, HSP90B1	188	5	19734	41.9872	1	0.961972	0.952352
UP_SEQ_FEATURE	ACT_SITE:Phosphocysteine intermediate	4	2.04082	0.0476532	PTPN18, PTPRC, PTPN7, PTPN4	184	91	20569	4.91376	1	1	0.994839
GOTERM_MF_DIRECT	GO:0019960~C-X3-C chemokine binding	2	1.02041	0.0480092	CX3CR1, ITGA4	190	5	19304	40.64	1	0.689412	0.668288
GOTERM_BP_DIRECT	GO:0006954~inflammatory response	9	4.59184	0.0481062	CX3CR1, GBP5, NRROS, F2R, ITGB2, CCR7, TSPAN2, CYBA, TNFRSF1B	188	422	19734	2.23866	1	0.97843	0.968646
UP_SEQ_FEATURE	DOMAIN:Ig-like C1-type	3	1.53061	0.0492478	HLA-B, HLA-C, B2M	184	40	20569	8.3841	1	1	0.994839
INTERPRO	IPR000387:Tyr_Pase_dom	4	2.04082	0.0506045	PTPN18, PTPRC, PTPN7, PTPN4	191	90	20607	4.79511	1	0.811017	0.802789
UP_SEQ_FEATURE	MOTIF:[IL]-x-C-x-x-[DE] motif	2	1.02041	0.0522142	ANXA5, MSN	184	6	20569	37.2627	1	1	0.994839
UP_SEQ_FEATURE	DOMAIN:NAC-A/B	2	1.02041	0.0522142	BTF3, NACA	184	6	20569	37.2627	1	1	0.994839
GOTERM_CC_DIRECT	GO:0098556~cytoplasmic side of rough endoplasmic reticulum membrane	2	1.02041	0.0530849	RPS28, RPL27	190	6	20887	36.6439	1	0.304978	0.265424
PIR_SUPERFAMILY	PIRSF002116:Ribosomal_S4	2	1.02041	0.05318	RPS4X, RPS4Y1	36	3	1940	35.9259	0.852307	1	1
INTERPRO	IPR006053:TNF	2	1.02041	0.0540678	FASLG, LTB	191	6	20607	35.9634	1	0.811017	0.802789
INTERPRO	IPR002715:Nas_poly-pep-assoc_cplx_dom	2	1.02041	0.0540678	BTF3, NACA	191	6	20607	35.9634	1	0.811017	0.802789
INTERPRO	IPR038187:NAC_A/B_dom_sf	2	1.02041	0.0540678	BTF3, NACA	191	6	20607	35.9634	1	0.811017	0.802789
GOTERM_BP_DIRECT	GO:0033077~T cell differentiation in thymus	3	1.53061	0.0550843	RPS6, IL7R, B2M	188	40	19734	7.87261	1	1	0.990826
SMART	SM01407:NAC	2	1.02041	0.0553688	BTF3, NACA	102	6	10692	34.9412	0.997988	0.670577	0.652121
GOTERM_BP_DIRECT	GO:0050819~negative regulation of coagulation	2	1.02041	0.055533	ANXA4, ANXA5	188	6	19734	34.9894	1	1	0.990826
GOTERM_BP_DIRECT	GO:0051715~cytolysis in another organism	2	1.02041	0.055533	GBP5, GBP1	188	6	19734	34.9894	1	1	0.990826
INTERPRO	IPR012340:NA-bd_OB-fold	4	2.04082	0.056245	RPS28, PYHIN1, RPL8, RPS23	191	94	20607	4.59107	1	0.825725	0.817348
GOTERM_MF_DIRECT	GO:0019903~protein phosphatase binding	4	2.04082	0.0569269	FCRL6, FCRL3, RACK1, HSP90B1	190	89	19304	4.56629	1	0.748181	0.725256
UP_KW_DOMAIN	KW-1133~Transmembrane helix	50	25.5102	0.057011	MT-ND4L, NRROS, COX4I1, ITGB2, LPCAT1, FASLG, COX7C, RPL9, RPS14, FCGR3A, MYC, CD38, CCR7, CLIC1, CD52, ITGA4, FCRL6, FCRL3, F2R, HLA-B, HLA-C, CYBA, EMP3, TNFRSF1B, TGFBR3, CD8B, MAL, LTB, CX3CR1, GYPC, IQGAP2, LEPROTL1, SARAF, SLAMF7, TSPAN2, CD58, TIGIT, CD99, S100A10, CD74, TM4SF19, ATP2B4, MCOLN2, PTPRC, SELL, PIK3IP1, SYT11, EIF3E, NMUR1, IL7R	102	5882	14597	1.21649	0.725118	0.493289	0.493289
GOTERM_MF_DIRECT	GO:0070180~large ribosomal subunit rRNA binding	2	1.02041	0.0573323	RPL12, RPLP0	190	6	19304	33.8667	1	0.748181	0.725256
UP_KW_BIOLOGICAL_PROCESS	KW-0810~Translation regulation	4	2.04082	0.0577733	RPL10, RPS3, RACK1, EIF4G3	75	136	11450	4.4902	0.935264	0.442929	0.423671
GOTERM_MF_DIRECT	GO:0051059~NF-kappaB binding	3	1.53061	0.058354	NPM1, ANXA4, COMMD6	190	40	19304	7.62	1	0.748181	0.725256
UP_SEQ_FEATURE	SITE:Contributes to redox potential value	2	1.02041	0.060649	PDIA3, PDIA6	184	7	20569	31.9394	1	1	0.994839
UP_SEQ_FEATURE	REGION:GTPase domain (Globular)	2	1.02041	0.060649	GBP5, GBP1	184	7	20569	31.9394	1	1	0.994839
GOTERM_CC_DIRECT	GO:0001726~ruffle	4	2.04082	0.0609151	PALLD, S100A6, LCP1, S100A11	190	99	20887	4.44168	1	0.343233	0.298718
GOTERM_MF_DIRECT	GO:0003924~GTPase activity	8	4.08163	0.0612132	EEF1A1, ARL4C, GBP5, RGS10, EEF2, RHOC, GBP1, ARL8A	190	356	19304	2.28315	1	0.757777	0.734558
GOTERM_BP_DIRECT	GO:0007204~positive regulation of cytosolic calcium ion concentration	5	2.55102	0.0612967	CX3CR1, CD52, F2R, CD38, CCR7	188	156	19734	3.36436	1	1	0.990826
KEGG_PATHWAY	hsa05163:Human cytomegalovirus infection	8	4.08163	0.0614937	PDIA3, MYC, HLA-B, HLA-C, FASLG, CALR, CALM1, B2M	138	226	8840	2.26754	0.999995	0.983899	0.97365
GOTERM_BP_DIRECT	GO:0046427~positive regulation of receptor signaling pathway via JAK-STAT	3	1.53061	0.0626177	F2R, CALM1, IL7R	188	43	19734	7.32335	1	1	0.990826
INTERPRO	IPR037684:GBP_C	2	1.02041	0.062792	GBP5, GBP1	191	7	20607	30.8257	1	0.902635	0.893478
GOTERM_BP_DIRECT	GO:0034976~response to endoplasmic reticulum stress	4	2.04082	0.0631515	PDIA3, HSPA5, PDIA6, HSP90B1	188	96	19734	4.37367	1	1	0.990826
GOTERM_MF_DIRECT	GO:0003779~actin binding	7	3.57143	0.0636041	PALLD, MSN, S100A4, LCP1, PFN1, IQGAP2, GBP1	190	287	19304	2.47805	1	0.761129	0.737807
GOTERM_CC_DIRECT	GO:0005788~endoplasmic reticulum lumen	7	3.57143	0.0640439	PDIA3, HSPA5, CALR, PPIB, PDIA6, B2M, HSP90B1	190	311	20887	2.47434	1	0.354054	0.308136
SMART	SM00739:KOW	2	1.02041	0.0642971	RPL27, RPL26	102	7	10692	29.9496	0.999285	0.700838	0.681549
GOTERM_BP_DIRECT	GO:0042492~gamma-delta T cell differentiation	2	1.02041	0.0644855	PTPRC, TCF7	188	7	19734	29.9909	1	1	0.990826
GOTERM_BP_DIRECT	GO:1902255~positive regulation of intrinsic apoptotic signaling pathway by p53 class mediator	2	1.02041	0.0644855	RPS7, MYC	188	7	19734	29.9909	1	1	0.990826
GOTERM_BP_DIRECT	GO:0002606~positive regulation of dendritic cell antigen processing and presentation	2	1.02041	0.0644855	CD74, CCR7	188	7	19734	29.9909	1	1	0.990826
GOTERM_BP_DIRECT	GO:0002250~adaptive immune response	9	4.59184	0.0662613	EOMES, CX3CR1, PDIA3, ZNF683, CD8B, HLA-B, HLA-C, SLAMF7, MCOLN2	188	452	19734	2.09007	1	1	0.990826
GOTERM_MF_DIRECT	GO:0042289~MHC class II protein binding	2	1.02041	0.0665646	CD74, FCRL6	190	7	19304	29.0286	1	0.770861	0.747241
UP_KW_DOMAIN	KW-0812~Transmembrane	50	25.5102	0.0672667	MT-ND4L, NRROS, COX4I1, ITGB2, LPCAT1, FASLG, COX7C, RPL9, RPS14, FCGR3A, MYC, CD38, CCR7, CLIC1, CD52, ITGA4, FCRL6, FCRL3, F2R, HLA-B, HLA-C, CYBA, EMP3, TNFRSF1B, TGFBR3, CD8B, MAL, LTB, CX3CR1, GYPC, IQGAP2, LEPROTL1, SARAF, SLAMF7, TSPAN2, CD58, TIGIT, CD99, S100A10, CD74, TM4SF19, ATP2B4, MCOLN2, PTPRC, SELL, PIK3IP1, SYT11, EIF3E, NMUR1, IL7R	102	5941	14597	1.20441	0.783895	0.493289	0.493289
GOTERM_BP_DIRECT	GO:0019882~antigen processing and presentation	3	1.53061	0.0678224	CD74, HLA-B, HLA-C	188	45	19734	6.99787	1	1	0.990826
UP_KW_BIOLOGICAL_PROCESS	KW-0306~Gastrulation	2	1.02041	0.0688675	EOMES, RACK1	75	11	11450	27.7576	0.962457	0.452558	0.432881
GOTERM_BP_DIRECT	GO:0045087~innate immune response	10	5.10204	0.069694	CX3CR1, FGR, ZNF683, SPON2, GBP5, HLA-B, HLA-C, CYBA, GBP1, MCOLN2	188	536	19734	1.95836	1	1	0.990826
GOTERM_BP_DIRECT	GO:1900026~positive regulation of substrate adhesion-dependent cell spreading	3	1.53061	0.0704768	ARPC2, CALR, S100A10	188	46	19734	6.84574	1	1	0.990826
INTERPRO	IPR010579:MHC_I_a_C	2	1.02041	0.0714362	HLA-B, HLA-C	191	8	20607	26.9725	1	1	0.991292
INTERPRO	IPR029021:Prot-tyrosine_phosphatase-like	4	2.04082	0.0732061	PTPN18, PTPRC, PTPN7, PTPN4	191	105	20607	4.1101	1	1	0.991292
GOTERM_BP_DIRECT	GO:0051001~negative regulation of nitric-oxide synthase activity	2	1.02041	0.0733537	ATP2B4, NOSIP	188	8	19734	26.242	1	1	0.990826
GOTERM_BP_DIRECT	GO:0061384~heart trabecula morphogenesis	2	1.02041	0.0733537	TGFBR3, NACA	188	8	19734	26.242	1	1	0.990826
GOTERM_BP_DIRECT	GO:0045588~positive regulation of gamma-delta T cell differentiation	2	1.02041	0.0733537	PTPRC, LEF1	188	8	19734	26.242	1	1	0.990826
GOTERM_BP_DIRECT	GO:0001915~negative regulation of T cell mediated cytotoxicity	2	1.02041	0.0733537	PTPRC, IL7R	188	8	19734	26.242	1	1	0.990826
GOTERM_BP_DIRECT	GO:2000510~positive regulation of dendritic cell chemotaxis	2	1.02041	0.0733537	CCR7, CALR	188	8	19734	26.242	1	1	0.990826
GOTERM_BP_DIRECT	GO:1903979~negative regulation of microglial cell activation	2	1.02041	0.0733537	PTPRC, SYT11	188	8	19734	26.242	1	1	0.990826
GOTERM_MF_DIRECT	GO:0004725~protein tyrosine phosphatase activity	4	2.04082	0.0733566	PTPN18, PTPRC, PTPN7, PTPN4	190	99	19304	4.10505	1	0.82297	0.797754
GOTERM_BP_DIRECT	GO:0032755~positive regulation of interleukin-6 production	4	2.04082	0.0745839	SPON2, CD74, F2R, CYBA	188	103	19734	4.07643	1	1	0.990826
GOTERM_MF_DIRECT	GO:0070181~small ribosomal subunit rRNA binding	2	1.02041	0.0757069	RPS3, RPS13	190	8	19304	25.4	1	0.823599	0.798364
GOTERM_BP_DIRECT	GO:0021762~substantia nigra development	3	1.53061	0.0758851	HSPA5, CALM1, ACTB	188	48	19734	6.56051	1	1	0.990826
UP_SEQ_FEATURE	DOMAIN:Ig-like	11	5.61224	0.0769561	FCGR3A, CD8B, FCRL6, PALLD, FCRL3, HLA-B, HLA-C, SLAMF7, CD58, TIGIT, B2M	184	670	20569	1.83533	1	1	0.994839
UP_SEQ_FEATURE	DOMAIN:Thioredoxin 2	2	1.02041	0.0772953	PDIA3, PDIA6	184	9	20569	24.8418	1	1	0.994839
UP_SEQ_FEATURE	DOMAIN:Thioredoxin 1	2	1.02041	0.0772953	PDIA3, PDIA6	184	9	20569	24.8418	1	1	0.994839
GOTERM_CC_DIRECT	GO:0062023~collagen-containing extracellular matrix	8	4.08163	0.0777113	ANXA4, ANXA5, S100A6, ANXA6, S100A4, CALR, HSP90B1, S100A10	190	408	20887	2.15552	1	0.421656	0.36697
GOTERM_BP_DIRECT	GO:0016311~dephosphorylation	4	2.04082	0.078008	PTPN18, PTPRC, PTPN7, PTPN4	188	105	19734	3.99878	1	1	0.990826
INTERPRO	IPR003191:Guanylate-bd/ATL_C	2	1.02041	0.080001	GBP5, GBP1	191	9	20607	23.9756	1	1	0.991292
GOTERM_BP_DIRECT	GO:0007165~signal transduction	18	9.18367	0.08047	IL32, NPM1, ANXA4, SH2D2A, ANXA5, PPP2R5A, FASLG, IQGAP2, RHOC, FGR, CDC42EP3, S100A6, CD38, PTPN7, LTB, IL7R, CLIC1, S100A11	188	1240	19734	1.52373	1	1	0.990826
GOTERM_BP_DIRECT	GO:0000056~ribosomal small subunit export from nucleus	2	1.02041	0.0821381	RPS15, NPM1	188	9	19734	23.3262	1	1	0.990826
GOTERM_BP_DIRECT	GO:0032651~regulation of interleukin-1 beta production	2	1.02041	0.0821381	F2R, CCR7	188	9	19734	23.3262	1	1	0.990826
GOTERM_BP_DIRECT	GO:0019674~NAD metabolic process	2	1.02041	0.0821381	LDHB, CD38	188	9	19734	23.3262	1	1	0.990826
GOTERM_BP_DIRECT	GO:0045428~regulation of nitric oxide biosynthetic process	2	1.02041	0.0821381	CX3CR1, NOSIP	188	9	19734	23.3262	1	1	0.990826
GOTERM_CC_DIRECT	GO:0009898~cytoplasmic side of plasma membrane	4	2.04082	0.0831458	PTPRC, S100A6, PTPN7, PTPN4	190	113	20887	3.89138	1	0.44294	0.385494
KEGG_PATHWAY	hsa05167:Kaposi sarcoma-associated herpesvirus infection	7	3.57143	0.0838849	MYC, TCF7, LEF1, HLA-B, HLA-C, CALM1, RPS27A	138	196	8840	2.28778	1	1	0.994764
GOTERM_BP_DIRECT	GO:0051209~release of sequestered calcium ion into cytosol	3	1.53061	0.0842338	PTPRC, F2R, CCR7	188	51	19734	6.17459	1	1	0.990826
GOTERM_MF_DIRECT	GO:0008097~5S rRNA binding	2	1.02041	0.0847601	RPL5, RPL11	190	9	19304	22.5778	1	0.894967	0.867545
UP_SEQ_FEATURE	DOMAIN:Ribosomal protein eL8/eL30/eS12/Gadd45	2	1.02041	0.0855081	RPL7A, RPL30	184	10	20569	22.3576	1	1	0.994839
UP_SEQ_FEATURE	REGION:Alpha-3	2	1.02041	0.0855081	HLA-B, HLA-C	184	10	20569	22.3576	1	1	0.994839
GOTERM_BP_DIRECT	GO:0007166~cell surface receptor signaling pathway	7	3.57143	0.0855521	FCGR3A, PTPRC, FCRL6, FCRL3, IL7R, B2M, LY6E	188	321	19734	2.28902	1	1	0.990826
GOTERM_BP_DIRECT	GO:0009615~response to virus	4	2.04082	0.0868624	FGR, RPS15A, CFL1, TPT1	188	110	19734	3.81702	1	1	0.990826
GOTERM_BP_DIRECT	GO:0007229~integrin-mediated signaling pathway	4	2.04082	0.0868624	FGR, ITGA4, ITGB2, PLEK	188	110	19734	3.81702	1	1	0.990826
GOTERM_CC_DIRECT	GO:0033018~sarcoplasmic reticulum lumen	2	1.02041	0.0869078	CALR, HSP90B1	190	10	20887	21.9863	1	0.453922	0.395052
GOTERM_BP_DIRECT	GO:0031334~positive regulation of protein-containing complex assembly	3	1.53061	0.0870763	RPS3, RACK1, RHOC	188	52	19734	6.05585	1	1	0.990826
GOTERM_CC_DIRECT	GO:0034774~secretory granule lumen	4	2.04082	0.0883057	EEF1A1, FGR, EEF2, S100A11	190	116	20887	3.79074	1	0.453922	0.395052
INTERPRO	IPR036543:Guanylate-bd_C_sf	2	1.02041	0.0884872	GBP5, GBP1	191	10	20607	21.578	1	1	0.991292
INTERPRO	IPR031157:G_TR_CS	2	1.02041	0.0884872	EEF1A1, EEF2	191	10	20607	21.578	1	1	0.991292
GOTERM_BP_DIRECT	GO:0032760~positive regulation of tumor necrosis factor production	4	2.04082	0.0905186	SPON2, FCGR3A, PTPRC, CYBA	188	112	19734	3.74886	1	1	0.990826
GOTERM_BP_DIRECT	GO:1990266~neutrophil migration	2	1.02041	0.0908398	ITGB2, MCOLN2	188	10	19734	20.9936	1	1	0.990826
GOTERM_BP_DIRECT	GO:0034695~response to prostaglandin E	2	1.02041	0.0908398	TGFBR3, CCR7	188	10	19734	20.9936	1	1	0.990826
GOTERM_BP_DIRECT	GO:0071803~positive regulation of podosome assembly	2	1.02041	0.0908398	MSN, LCP1	188	10	19734	20.9936	1	1	0.990826
GOTERM_BP_DIRECT	GO:0050764~regulation of phagocytosis	2	1.02041	0.0908398	FGR, PTPRC	188	10	19734	20.9936	1	1	0.990826
GOTERM_BP_DIRECT	GO:0048146~positive regulation of fibroblast proliferation	3	1.53061	0.0928462	CD74, MYC, S100A6	188	54	19734	5.83156	1	1	0.990826
GOTERM_BP_DIRECT	GO:0001837~epithelial to mesenchymal transition	3	1.53061	0.0928462	TGFBR3, LEF1, S100A4	188	54	19734	5.83156	1	1	0.990826
UP_SEQ_FEATURE	DOMAIN:GB1/RHD3-type G	2	1.02041	0.0936481	GBP5, GBP1	184	11	20569	20.3251	1	1	0.994839
GOTERM_MF_DIRECT	GO:0004859~phospholipase inhibitor activity	2	1.02041	0.0937252	ANXA4, ANXA5	190	10	19304	20.32	1	0.934648	0.90601
GOTERM_MF_DIRECT	GO:0030957~Tat protein binding	2	1.02041	0.0937252	NPM1, ACTB	190	10	19304	20.32	1	0.934648	0.90601
GOTERM_CC_DIRECT	GO:0044194~cytolytic granule	2	1.02041	0.0951741	GNLY, CALR	190	11	20887	19.9876	1	0.480793	0.418438
KEGG_PATHWAY	hsa05169:Epstein-Barr virus infection	7	3.57143	0.0953533	PDIA3, MYC, HLA-B, HLA-C, CD58, CALR, B2M	138	203	8840	2.2089	1	1	0.994764
GOTERM_BP_DIRECT	GO:0050766~positive regulation of phagocytosis	3	1.53061	0.0957719	PTPRC, CYBA, CALR	188	55	19734	5.72553	1	1	0.990826
INTERPRO	IPR015894:Guanylate-bd_N	2	1.02041	0.0968956	GBP5, GBP1	191	11	20607	19.6164	1	1	0.991292
INTERPRO	IPR030386:G_GB1_RHD3_dom	2	1.02041	0.0968956	GBP5, GBP1	191	11	20607	19.6164	1	1	0.991292
INTERPRO	IPR019954:Ubiquitin_CS	2	1.02041	0.0968956	FAU, RPS27A	191	11	20607	19.6164	1	1	0.991292
GOTERM_CC_DIRECT	GO:0005903~brush border	3	1.53061	0.0969382	MYL6, CLIC1, ACTB	190	58	20887	5.68612	1	0.481405	0.41897
UP_KW_DOMAIN	KW-0732~Signal	38	19.3878	0.0979435	SPON2, MT-ND4L, NRROS, ITGB2, HSP90B1, FCGR3A, GNLY, SARAF, SLAMF7, CCR7, CD58, TIGIT, B2M, CD99, IL32, PDIA3, CD52, FGFBP2, ITGA4, HSPA5, FCRL6, FCRL3, GZMA, F2R, HLA-B, HLA-C, TNFRSF1B, PDIA6, TGFBR3, RPS27, PTPRC, SELL, CD8B, PIK3IP1, CALR, PPIB, IL7R, LY6E	102	4410	14597	1.23313	0.896452	0.538689	0.538689
GOTERM_MF_DIRECT	GO:0019902~phosphatase binding	3	1.53061	0.0980898	FCRL6, FCRL3, LPCAT1	190	54	19304	5.64444	1	0.949298	0.920211
GOTERM_BP_DIRECT	GO:0044829~positive regulation by host of viral genome replication	2	1.02041	0.0994594	EEF1A1, PPIB	188	11	19734	19.0851	1	1	0.990826
GOTERM_BP_DIRECT	GO:2000343~positive regulation of chemokine (C-X-C motif) ligand 2 production	2	1.02041	0.0994594	CD74, MCOLN2	188	11	19734	19.0851	1	1	0.990826
GOTERM_BP_DIRECT	GO:1904044~response to aldosterone	2	1.02041	0.0994594	PTPRC, RPL27	188	11	19734	19.0851	1	1	0.990826
GOTERM_BP_DIRECT	GO:0032675~regulation of interleukin-6 production	2	1.02041	0.0994594	HLA-B, CAPN2	188	11	19734	19.0851	1	1	0.990826

## Sheet: late_blue_GO
Category	Term	Count	%	PValue	Genes	List Total	Pop Hits	Pop Total	Fold Enrichment	Bonferroni	Benjamini	FDR
GOTERM_BP_DIRECT	GO:0002181~cytoplasmic translation	19	31.6667	2.01544e-28	RPL21, RPS8, RPL34, RPL36A, RPL35A, RPS26, RPS28, RPS16, RPS27, RPS29, RPL37A, RPL36, RPLP2, RPL35, RPL38, RPS2, RPL37, RPS21, RPL39	59	97	19734	65.5156	1.14477e-25	1.14477e-25	1.13268e-25
GOTERM_MF_DIRECT	GO:0003735~structural constituent of ribosome	19	31.6667	1.1425e-22	RPL21, RPS8, RPL34, RPL36A, RPL35A, RPS26, RPS28, RPS16, RPS27, RPS29, RPL37A, RPL36, RPLP2, RPL35, RPL38, RPS2, RPL37, RPS21, RPL39	59	191	19304	32.5473	1.72518e-20	1.72518e-20	1.63378e-20
GOTERM_BP_DIRECT	GO:0006412~translation	19	31.6667	2.17311e-22	RPL21, RPS8, RPL34, RPL36A, RPL35A, RPS26, RPS28, RPS16, RPS27, RPS29, RPL37A, RPL36, RPLP2, RPL35, RPL38, RPS2, RPL37, RPS21, RPL39	59	202	19734	31.4605	1.23433e-19	6.17163e-20	6.10643e-20
UP_KW_MOLECULAR_FUNCTION	KW-0689~Ribosomal protein	19	31.6667	1.67744e-21	RPL21, RPS8, RPL34, RPL36A, RPL35A, RPS26, RPS28, RPS16, RPS27, RPS29, RPL37A, RPL36, RPLP2, RPL35, RPL38, RPS2, RPL37, RPS21, RPL39	44	197	11889	26.0603	3.69036e-20	3.69036e-20	3.69036e-20
GOTERM_CC_DIRECT	GO:0022626~cytosolic ribosome	15	25	4.34494e-21	RPL21, RPS8, RPL34, RPL36A, RPL35A, RPS16, RPS27, RPL37A, RPL36, RPL35, RPL38, RPS2, RPL37, RPS21, RPL39	59	94	20887	56.4921	8.64644e-19	8.64644e-19	7.42985e-19
UP_KW_MOLECULAR_FUNCTION	KW-0687~Ribonucleoprotein	21	35	9.14392e-21	RPL21, RPS8, RPL34, RPL36A, RPL35A, RPS26, RPS28, RPS16, HNRNPK, RPS27, RPS29, HNRNPF, RPL37A, RPL36, RPLP2, RPL35, RPL38, RPS2, RPL37, RPS21, RPL39	44	316	11889	17.9566	2.01166e-19	1.00583e-19	1.00583e-19
KEGG_PATHWAY	hsa03010:Ribosome	19	31.6667	2.25375e-18	RPL21, RPS8, RPL34, RPL36A, RPL35A, RPS26, RPS28, RPS16, RPS27, RPS29, RPL37A, RPL36, RPLP2, RPL35, RPL38, RPS2, RPL37, RPS21, RPL39	54	172	8840	18.0835	3.35808e-16	3.35808e-16	2.86226e-16
GOTERM_CC_DIRECT	GO:0005925~focal adhesion	20	33.3333	3.3047e-18	HSPA8, RPS8, YWHAZ, RHOA, ACTB, ACTG1, RPS16, HNRNPK, PTPRC, ARPC2, RPS29, RPL37A, RAC2, RPLP2, EVL, RPL38, VIM, PABPC1, CALR, RPS2	59	435	20887	16.2766	6.57636e-16	3.28818e-16	2.82552e-16
GOTERM_MF_DIRECT	GO:0003723~RNA binding	30	50	6.85074e-18	SF3B2, RPL34, RPL36A, RPS16, RPL36, RPL35, RPL38, RPL37, RPS2, RPL39, HSPA8, RPL21, RPS8, CNBP, RPL35A, YWHAZ, RPS26, RPS28, PKM, RPS27, HNRNPK, RPS29, NCL, HNRNPF, RPL37A, VIM, PABPC1, CALR, RPS21, TPT1	59	1455	19304	6.74611	1.03446e-15	5.17231e-16	4.89828e-16
GOTERM_CC_DIRECT	GO:0070062~extracellular exosome	33	55	1.16853e-16	WDR1, RPL34, LSP1, ACTB, ACTG1, RPS16, FTH1, ARHGDIB, RAC2, RPLP2, RPS2, HSPA8, RPS8, HLA-B, RPL35A, HLA-C, YWHAZ, RHOA, HLA-E, RPS26, RPS28, PKM, PTPRC, HNRNPK, ARPC2, RPS29, LCK, NCL, RPL37A, VIM, PABPC1, CALR, TPT1	59	2258	20887	5.17385	2.20934e-14	7.75124e-15	6.66061e-15
KEGG_PATHWAY	hsa05171:Coronavirus disease - COVID-19	19	31.6667	7.74825e-16	RPL21, RPS8, RPL34, RPL36A, RPL35A, RPS26, RPS28, RPS16, RPS27, RPS29, RPL37A, RPL36, RPLP2, RPL35, RPL38, RPS2, RPL37, RPS21, RPL39	54	238	8840	13.0688	1.15796e-13	5.77245e-14	4.92014e-14
GOTERM_CC_DIRECT	GO:0022625~cytosolic large ribosomal subunit	11	18.3333	1.31384e-14	RPL21, RPL34, RPL37A, RPL36, RPL36A, RPL35A, RPLP2, RPL35, RPL38, RPL37, RPL39	59	78	20887	49.9255	2.60703e-12	6.53636e-13	5.61667e-13
GOTERM_CC_DIRECT	GO:0005840~ribosome	10	16.6667	3.63156e-11	RPS26, RPS28, RPS27, RPL21, RPS29, RPL36, RPL36A, RPL38, CALR, RPS2	59	118	20887	30.0014	7.22681e-09	1.44536e-09	1.24199e-09
UP_KW_PTM	KW-0007~Acetylation	36	60	4.18433e-11	SF3B2, WDR1, RPL34, LSP1, ACTB, ACTG1, RPS16, FTH1, ARHGDIB, RPL36, RAC2, RPL35, RPLP2, RPL38, RPL37, RPS2, ATP5ME, HSPA8, RPS8, CNBP, RPL35A, YWHAZ, ATP5F1E, MT-ATP8, RPS28, PKM, HNRNPK, ARPC2, RPS29, NCL, HNRNPF, VIM, PABPC1, CALR, CALM1, RPS21	52	3511	14252	2.81024	7.5318e-10	7.95024e-10	6.69494e-10
GOTERM_CC_DIRECT	GO:0022627~cytosolic small ribosomal subunit	8	13.3333	1.06271e-10	RPS26, RPS28, RPS27, RPS16, RPS8, RPS29, RPS2, RPS21	59	52	20887	54.4641	2.1148e-08	3.52467e-09	3.02873e-09
GOTERM_CC_DIRECT	GO:0005829~cytosol	40	66.6667	1.90899e-10	WDR1, RPL34, RPL36A, ACTB, ACTG1, RPS16, FTH1, ARHGDIB, RPL36, RAC2, RPL35, RPLP2, RPL38, RPL37, RPS2, RPL39, HSPA8, RPL21, RPS8, CNBP, LAPTM5, RPL35A, YWHAZ, RHOA, RPS26, RPS28, PKM, RPS27, ARPC2, RPS29, LCK, HNRNPF, RPL37A, EVL, VIM, PABPC1, CALR, CALM1, RPS21, TPT1	59	5649	20887	2.50676	3.79888e-08	5.42698e-09	4.66338e-09
UP_KW_BIOLOGICAL_PROCESS	KW-0945~Host-virus interaction	14	23.3333	1.13035e-09	HSPA8, SF3B2, SELPLG, HLA-B, HLA-C, YWHAZ, RHOA, HLA-E, HNRNPK, PTPRC, LCK, VIM, PABPC1, CALM1	28	690	11450	8.2971	2.82587e-08	2.82587e-08	2.5998e-08
UP_KW_DISEASE	KW-1024~Diamond-Blackfan anemia	6	10	2.30815e-08	RPS26, RPS28, RPS27, RPS29, RPL35A, RPL35	24	20	4817	60.2125	3.92386e-07	3.92386e-07	3.92386e-07
UP_KW_CELLULAR_COMPONENT	KW-0963~Cytoplasm	40	66.6667	2.53132e-08	WDR1, RPL34, RPL36A, ACTB, ACTG1, RPS16, FTH1, ARHGDIB, RPL36, RAC2, RPL35, RPL38, RPL37, RPS2, RPL39, HSPA8, RPL21, RPS8, CNBP, MTRNR2L12, RPL35A, YWHAZ, RHOA, RPS26, RPS28, PKM, RPS27, HNRNPK, ARPC2, RPS29, LCK, NCL, RPL37A, EVL, VIM, PABPC1, CALR, CALM1, RPS21, TPT1	58	5805	17942	2.13158	6.83456e-07	6.83456e-07	6.3283e-07
GOTERM_CC_DIRECT	GO:0015935~small ribosomal subunit	5	8.33333	7.1403e-08	RPS26, RPS28, RPS16, RPS29, RPS21	59	15	20887	118.006	1.42091e-05	1.77615e-06	1.52624e-06
GOTERM_CC_DIRECT	GO:0005737~cytoplasm	36	60	1.69179e-07	RPL34, ACTB, ACTG1, RPS16, FTH1, ARHGDIB, RPL36, RPL35, RPLP2, RPL38, RPL37, RPS2, HSPA8, RPL21, RPS8, CNBP, MTRNR2L12, RPL35A, YWHAZ, RPS26, RPS28, PKM, HNRNPK, ARPC2, RPS29, LCK, NCL, RPL37A, EVL, TMBIM6, VIM, PABPC1, CALR, CALM1, RPS21, TPT1	59	5754	20887	2.21491	3.3666e-05	3.74073e-06	3.2144e-06
GOTERM_CC_DIRECT	GO:0045202~synapse	11	18.3333	1.15082e-06	RPS26, RPS28, RPS16, PTPRC, RPL21, HNRNPF, RPL34, RPL36, RPS21, ACTB, ACTG1	59	505	20887	7.71126	0.000228987	2.29014e-05	1.96791e-05
GOTERM_MF_DIRECT	GO:0003729~mRNA binding	9	15	1.34422e-06	RPS26, PKM, HNRNPK, CNBP, NCL, RPL35, PABPC1, CALR, RPS2	59	269	19304	10.9468	0.000202957	6.7659e-05	6.40744e-05
GOTERM_CC_DIRECT	GO:1990904~ribonucleoprotein complex	8	13.3333	1.82931e-06	HSPA8, HNRNPK, RPS8, HNRNPF, NCL, RPL38, PABPC1, ACTB	59	210	20887	13.4864	0.000363967	3.30939e-05	2.84375e-05
UP_SEQ_FEATURE	CROSSLNK:Glycyl lysine isopeptide (Lys-Gly) (interchain with G-Cter in SUMO2); alternate	9	15	1.86833e-06	HSPA8, PKM, HNRNPK, HNRNPF, NCL, RPL38, VIM, RPS2, CALM1	51	350	20569	10.3709	0.000547273	0.000547422	0.00052687
INTERPRO	IPR011332:Ribosomal_zn-bd	4	6.66667	4.81531e-06	RPS27, RPL37A, RPL36A, RPL37	60	12	20607	114.483	0.00100108	0.00100158	0.000987138
GOTERM_BP_DIRECT	GO:0001916~positive regulation of T cell mediated cytotoxicity	5	8.33333	6.27213e-06	HSPA8, PTPRC, HLA-B, HLA-C, HLA-E	59	41	19734	40.7896	0.00355624	0.00118752	0.00117498
GOTERM_CC_DIRECT	GO:0016020~membrane	30	50	1.77923e-05	SELPLG, LSP1, MT-ND3, ACTB, ACTG1, RPS16, FTH1, ARHGDIB, RPL36, RPL35, RPLP2, RPS2, HSPA8, RPL21, RPS8, HLA-B, SHISA5, RPL35A, HLA-C, RHOA, HLA-E, RPS26, PTPRC, HNRNPK, NCL, HNRNPF, EVL, TMBIM6, PABPC1, CALR	59	5048	20887	2.1039	0.00353443	0.000295055	0.00025354
GOTERM_BP_DIRECT	GO:0042776~proton motive force-driven mitochondrial ATP synthesis	5	8.33333	4.48484e-05	MT-ND4, MT-ND3, ATP5F1E, MT-ATP8, ATP5ME	59	67	19734	24.9608	0.0251527	0.00636847	0.00630119
KEGG_PATHWAY	hsa05416:Viral myocarditis	6	10	5.37e-05	HLA-B, RAC2, HLA-C, ACTB, ACTG1, HLA-E	54	69	8840	14.2351	0.00796959	0.0026671	0.0022733
UP_SEQ_FEATURE	CROSSLNK:Glycyl lysine isopeptide (Lys-Gly) (interchain with G-Cter in SUMO1); alternate	6	10	7.8771e-05	HSPA8, PKM, HNRNPK, NCL, VIM, RPS2	51	182	20569	13.2961	0.0228165	0.0115399	0.0111067
GOTERM_CC_DIRECT	GO:0030670~phagocytic vesicle membrane	5	8.33333	9.59257e-05	HLA-B, RAC2, HLA-C, CALR, HLA-E	59	86	20887	20.5824	0.0189091	0.0014684	0.00126179
KEGG_PATHWAY	hsa04612:Antigen processing and presentation	6	10	0.00010929	HSPA8, CD8A, HLA-B, HLA-C, CALR, HLA-E	54	80	8840	12.2778	0.0161532	0.00407105	0.00346996
GOTERM_CC_DIRECT	GO:0098556~cytoplasmic side of rough endoplasmic reticulum membrane	3	5	0.000112864	RPS26, RPS28, RPS29	59	6	20887	177.008	0.0222108	0.00160428	0.00137855
GOTERM_MF_DIRECT	GO:0019901~protein kinase binding	9	15	0.000120981	PTPRC, LCK, RAC2, CALM1, CD3E, YWHAZ, RHOA, ACTB, ACTG1	59	502	19304	5.86589	0.0181034	0.00456705	0.00432508
GOTERM_CC_DIRECT	GO:0098553~lumenal side of endoplasmic reticulum membrane	4	6.66667	0.000124853	HLA-B, HLA-C, CALR, HLA-E	59	35	20887	40.4591	0.0245411	0.00165638	0.00142332
KEGG_PATHWAY	hsa05135:Yersinia infection	7	11.6667	0.000163071	ARPC2, LCK, CD8A, RAC2, RHOA, ACTB, ACTG1	54	138	8840	8.30381	0.0240067	0.00485952	0.00414201
UP_KW_PTM	KW-1017~Isopeptide bond	18	30	0.000174774	HSPA8, SF3B2, RPS8, RPL34, RHOA, ACTB, ACTG1, PKM, HNRNPK, HNRNPF, NCL, RPL35, TMBIM6, RPL38, VIM, RPS2, CALM1, RPS21	52	1876	14252	2.62974	0.00314126	0.00166035	0.00139819
GOTERM_CC_DIRECT	GO:0030027~lamellipodium	6	10	0.000206667	ARPC2, RAC2, EVL, PABPC1, RHOA, ACTB	59	195	20887	10.8928	0.0402966	0.00257042	0.00220875
INTERPRO	IPR010579:MHC_I_a_C	3	5	0.000223163	HLA-B, HLA-C, HLA-E	60	8	20607	128.794	0.045362	0.0232089	0.0228742
UP_SEQ_FEATURE	REGION:Alpha-3	3	5	0.000257375	HLA-B, HLA-C, HLA-E	51	10	20569	120.994	0.0726466	0.025137	0.0241933
GOTERM_CC_DIRECT	GO:0042612~MHC class I protein complex	3	5	0.000269425	HLA-B, HLA-C, HLA-E	59	9	20887	118.006	0.0522105	0.00315386	0.0027101
UP_KW_PTM	KW-0488~Methylation	13	21.6667	0.000272845	HSPA8, SF3B2, CNBP, RHOA, ACTB, ACTG1, PKM, HNRNPK, RPS29, NCL, RAC2, PABPC1, CALM1	52	1056	14252	3.37405	0.00489984	0.00172802	0.00145517
UP_KW_CELLULAR_COMPONENT	KW-0490~MHC I	3	5	0.00035191	HLA-B, HLA-C, HLA-E	58	9	17942	103.115	0.00945824	0.00475079	0.00439888
GOTERM_MF_DIRECT	GO:0005515~protein binding	51	85	0.000466278	RPL34, LSP1, CD3E, MT-ND3, ACTB, ACTG1, RPS16, FTH1, ARHGDIB, RAC2, RPLP2, RPL38, RPL21, RPS8, HLA-B, SHISA5, HLA-C, YWHAZ, RHOA, HLA-E, PKM, CD8A, LCK, NCL, RPL37A, EVL, TMBIM6, PABPC1, SF3B2, SELPLG, RPL36A, RPS2, ATP5ME, HSPA8, CNBP, LAPTM5, RPL35A, ATP5F1E, MT-ATP8, RPS26, RPS28, PTPRC, RPS27, HNRNPK, ARPC2, HNRNPF, VIM, CALR, CALM1, RPS21, TPT1	59	12754	19304	1.30834	0.0680018	0.0123895	0.0117331
GOTERM_MF_DIRECT	GO:0045296~cadherin binding	7	11.6667	0.000494657	RPS26, HSPA8, PKM, HNRNPK, RPL34, RPS2, YWHAZ	59	335	19304	6.83673	0.071989	0.0123895	0.0117331
GOTERM_MF_DIRECT	GO:0042608~T cell receptor binding	3	5	0.000574347	LCK, CD3E, HLA-E	59	12	19304	81.7966	0.0830949	0.0123895	0.0117331
INTERPRO	IPR001039:MHC_I_a_a1/a2	3	5	0.000615965	HLA-B, HLA-C, HLA-E	60	13	20607	79.2577	0.120288	0.0427069	0.042091
UP_SEQ_FEATURE	REGION:Alpha-2	3	5	0.000679962	HLA-B, HLA-C, HLA-E	51	16	20569	75.6213	0.180693	0.0398458	0.0383498
UP_SEQ_FEATURE	REGION:Alpha-1	3	5	0.000679962	HLA-B, HLA-C, HLA-E	51	16	20569	75.6213	0.180693	0.0398458	0.0383498
UP_KW_BIOLOGICAL_PROCESS	KW-0066~ATP synthesis	3	5	0.000800462	ATP5F1E, MT-ATP8, ATP5ME	28	18	11450	68.1548	0.0198205	0.0100058	0.00920531
UP_SEQ_FEATURE	CROSSLNK:Glycyl lysine isopeptide (Lys-Gly) (interchain with G-Cter in SUMO2)	11	18.3333	0.000862347	SF3B2, PKM, HNRNPK, RPS8, HNRNPF, NCL, RPL34, RPL35, RPL38, VIM, RPS21	51	1277	20569	3.47412	0.223359	0.0403687	0.0388532
UP_SEQ_FEATURE	DOMAIN:Immunoglobulin C1-set	3	5	0.000964441	HLA-B, HLA-C, HLA-E	51	19	20569	63.6811	0.246267	0.0403687	0.0388532
GOTERM_BP_DIRECT	GO:2000767~positive regulation of cytoplasmic translation	3	5	0.000992147	PKM, CNBP, PABPC1	59	16	19734	62.714	0.430968	0.110695	0.109525
BBID	70.Signal_peptides_(MHC)_class_I_molecules	3	5	0.00118224	HLA-B, HLA-C, HLA-E	7	4	388	41.5714	0.0175876	0.0165513	0.0165513
GOTERM_CC_DIRECT	GO:0009897~external side of plasma membrane	7	11.6667	0.00119045	PTPRC, CD8A, HLA-B, HLA-C, CALR, CD3E, HLA-E	59	429	20887	5.7765	0.211041	0.0131611	0.0113093
GOTERM_CC_DIRECT	GO:0032040~small-subunit processome	4	6.66667	0.00128475	RPS28, RPS27, RPS16, RPS8	59	77	20887	18.3905	0.225727	0.0134561	0.0115628
UP_SEQ_FEATURE	DOMAIN:MHC class I-like antigen recognition-like	3	5	0.00129679	HLA-B, HLA-C, HLA-E	51	22	20569	54.9973	0.316279	0.0474948	0.0457117
KEGG_PATHWAY	hsa05203:Viral carcinogenesis	7	11.6667	0.00133829	PKM, HNRNPK, HLA-B, HLA-C, YWHAZ, RHOA, HLA-E	54	205	8840	5.58988	0.180892	0.0303225	0.0258454
UP_KW_CELLULAR_COMPONENT	KW-0747~Spliceosome	5	8.33333	0.00141374	HSPA8, SF3B2, HNRNPK, HNRNPF, PABPC1	58	153	17942	10.1093	0.0374777	0.0127237	0.0117812
GOTERM_CC_DIRECT	GO:0005783~endoplasmic reticulum	11	18.3333	0.00143788	RPL21, RPS8, CNBP, RPL34, HLA-B, RPL36A, SHISA5, HLA-C, TMBIM6, CALR, CD3E	59	1185	20887	3.28623	0.248996	0.0143069	0.0122939
GOTERM_BP_DIRECT	GO:0042274~ribosomal small subunit biogenesis	4	6.66667	0.00145465	RPS28, RPS27, RPS16, RPS8	59	76	19734	17.6039	0.562573	0.110695	0.109525
KEGG_PATHWAY	hsa05340:Primary immunodeficiency	4	6.66667	0.00148032	PTPRC, LCK, CD8A, CD3E	54	38	8840	17.232	0.198067	0.0303225	0.0258454
GOTERM_CC_DIRECT	GO:0031982~vesicle	5	8.33333	0.00154283	PKM, CALM1, YWHAZ, RHOA, ACTB	59	179	20887	9.88874	0.26454	0.0146201	0.012563
GOTERM_BP_DIRECT	GO:0002476~antigen processing and presentation of endogenous peptide antigen via MHC class Ib	3	5	0.00155908	HLA-B, HLA-C, HLA-E	59	20	19734	50.1712	0.587801	0.110695	0.109525
GOTERM_BP_DIRECT	GO:0002486~antigen processing and presentation of endogenous peptide antigen via MHC class I via ER pathway, TAP-independent	3	5	0.00155908	HLA-B, HLA-C, HLA-E	59	20	19734	50.1712	0.587801	0.110695	0.109525
KEGG_PATHWAY	hsa05170:Human immunodeficiency virus 1 infection	7	11.6667	0.00162805	HLA-B, RAC2, HLA-C, CALR, CALM1, CD3E, HLA-E	54	213	8840	5.37993	0.215554	0.0303225	0.0258454
GOTERM_MF_DIRECT	GO:0046933~proton-transporting ATP synthase activity, rotational mechanism	3	5	0.00162808	ATP5F1E, MT-ATP8, ATP5ME	59	20	19304	49.078	0.218109	0.03073	0.0291019
GOTERM_CC_DIRECT	GO:0005753~mitochondrial proton-transporting ATP synthase complex	3	5	0.00184674	ATP5F1E, MT-ATP8, ATP5ME	59	23	20887	46.1761	0.307773	0.0167046	0.0143542
GOTERM_CC_DIRECT	GO:0042995~cell projection	5	8.33333	0.00206961	HNRNPK, WDR1, ARPC2, RAC2, EVL	59	194	20887	9.12415	0.33786	0.0179066	0.0153871
KEGG_PATHWAY	hsa05163:Human cytomegalovirus infection	7	11.6667	0.00219826	HLA-B, RAC2, HLA-C, CALR, CALM1, RHOA, HLA-E	54	226	8840	5.07047	0.279565	0.0324207	0.0276338
KEGG_PATHWAY	hsa04514:Cell adhesion molecules	6	10	0.00239348	SELPLG, PTPRC, CD8A, HLA-B, HLA-C, HLA-E	54	157	8840	6.25619	0.300266	0.0324207	0.0276338
KEGG_PATHWAY	hsa04145:Phagosome	6	10	0.00239348	HLA-B, HLA-C, CALR, ACTB, ACTG1, HLA-E	54	157	8840	6.25619	0.300266	0.0324207	0.0276338
GOTERM_MF_DIRECT	GO:0031625~ubiquitin protein ligase binding	6	10	0.00239623	HSPA8, LAPTM5, TMBIM6, CALR, YWHAZ, ACTG1	59	311	19304	6.31228	0.303902	0.0402034	0.0380734
GOTERM_BP_DIRECT	GO:0015986~proton motive force-driven ATP synthesis	3	5	0.00263684	ATP5F1E, MT-ATP8, ATP5ME	59	26	19734	38.5932	0.776804	0.166414	0.164656
KEGG_PATHWAY	hsa04714:Thermogenesis	7	11.6667	0.00267382	MT-ND4, MT-ND3, ATP5F1E, ACTB, MT-ATP8, ACTG1, ATP5ME	54	235	8840	4.87628	0.328964	0.0332	0.028298
GOTERM_CC_DIRECT	GO:0071013~catalytic step 2 spliceosome	4	6.66667	0.00279238	SF3B2, HNRNPK, HNRNPF, PABPC1	59	101	20887	14.0205	0.426766	0.0224414	0.0192838
GOTERM_CC_DIRECT	GO:0030667~secretory granule membrane	4	6.66667	0.00287137	PTPRC, HLA-B, HLA-C, RHOA	59	102	20887	13.883	0.435731	0.0224414	0.0192838
GOTERM_CC_DIRECT	GO:0043296~apical junction complex	3	5	0.00293204	RHOA, ACTB, ACTG1	59	29	20887	36.6224	0.442522	0.0224414	0.0192838
GOTERM_BP_DIRECT	GO:0000398~mRNA splicing, via spliceosome	5	8.33333	0.00293661	HSPA8, SF3B2, HNRNPK, HNRNPF, PABPC1	59	202	19734	8.27907	0.811837	0.166799	0.165037
GOTERM_CC_DIRECT	GO:0005856~cytoskeleton	7	11.6667	0.00307133	ARHGDIB, RAC2, EVL, VIM, RHOA, ACTB, ACTG1	59	518	20887	4.78401	0.457808	0.0226369	0.0194518
INTERPRO	IPR037055:MHC_I-like_Ag-recog_sf	3	5	0.0031132	HLA-B, HLA-C, HLA-E	60	29	20607	35.5293	0.4772	0.129509	0.127641
INTERPRO	IPR011161:MHC_I-like_Ag-recog	3	5	0.0031132	HLA-B, HLA-C, HLA-E	60	29	20607	35.5293	0.4772	0.129509	0.127641
BIOCARTA	h_tcraPathway:Lck and Fyn tyrosine kinases in initiation of TCR Activation	3	5	0.00312898	PTPRC, LCK, CD3E	14	11	1623	31.6169	0.184295	0.121479	0.121479
UP_KW_CELLULAR_COMPONENT	KW-0256~Endoplasmic reticulum	12	20	0.00367826	RPS26, RPS28, RPL21, RPS29, CNBP, RPL34, HLA-B, SHISA5, HLA-C, TMBIM6, CALR, RPS21	58	1380	17942	2.68996	0.0947064	0.0248282	0.0229891
BIOCARTA	h_tcytotoxicPathway:T Cytotoxic Cell Surface Molecules	3	5	0.00373781	PTPRC, CD8A, CD3E	14	12	1623	28.9821	0.216052	0.121479	0.121479
UP_SEQ_FEATURE	REGION:Connecting peptide	3	5	0.00384981	HLA-B, HLA-C, HLA-E	51	38	20569	31.8406	0.677022	0.118565	0.114114
UP_SEQ_FEATURE	DOMAIN:Ig-like C1-type	3	5	0.00425828	HLA-B, HLA-C, HLA-E	51	40	20569	30.2485	0.713593	0.118565	0.114114
GOTERM_MF_DIRECT	GO:0005200~structural constituent of cytoskeleton	4	6.66667	0.00453754	ARPC2, VIM, ACTB, ACTG1	59	111	19304	11.7905	0.49678	0.0681549	0.064544
UP_SEQ_FEATURE	CROSSLNK:(Microbial infection) Isoglutamyl lysine isopeptide (Glu-Lys) (interchain with K-50); by Vibrio toxins RtxA and VgrG1	2	3.33333	0.00485589	ACTB, ACTG1	51	2	20569	403.314	0.75979	0.118565	0.114114
UP_SEQ_FEATURE	CROSSLNK:(Microbial infection) Isoglutamyl lysine isopeptide (Lys-Glu) (interchain with E-270); by Vibrio toxins RtxA and VgrG1	2	3.33333	0.00485589	ACTB, ACTG1	51	2	20569	403.314	0.75979	0.118565	0.114114
GOTERM_MF_DIRECT	GO:0005102~signaling receptor binding	6	10	0.00496492	SELPLG, PTPRC, LCK, HLA-B, HLA-C, HLA-E	59	369	19304	5.3201	0.528375	0.0681549	0.064544
GOTERM_BP_DIRECT	GO:0050852~T cell receptor signaling pathway	4	6.66667	0.00555372	PTPRC, LCK, CD8A, CD3E	59	122	19734	10.9664	0.957714	0.271182	0.268317
UP_KW_BIOLOGICAL_PROCESS	KW-0508~mRNA splicing	5	8.33333	0.00584988	HSPA8, SF3B2, HNRNPK, HNRNPF, PABPC1	28	313	11450	6.53241	0.136427	0.048749	0.0448491
GOTERM_BP_DIRECT	GO:0097214~positive regulation of lysosomal membrane permeability	2	3.33333	0.00586969	HSPA8, LAPTM5	59	2	19734	334.475	0.964698	0.271182	0.268317
GOTERM_CC_DIRECT	GO:0005681~spliceosomal complex	4	6.66667	0.00590859	HSPA8, SF3B2, HNRNPK, NCL	59	132	20887	10.7278	0.692505	0.0419932	0.0360846
KEGG_PATHWAY	hsa04660:T cell receptor signaling pathway	5	8.33333	0.00600434	PTPRC, LCK, CD8A, CD3E, RHOA	54	122	8840	6.70917	0.592349	0.068819	0.0586578
GOTERM_BP_DIRECT	GO:0006364~rRNA processing	4	6.66667	0.00620662	RPS28, RPS27, RPS16, RPL35A	59	127	19734	10.5346	0.97088	0.271182	0.268317
UP_SEQ_FEATURE	DOMAIN:RRM 3	3	5	0.00684325	HNRNPF, NCL, PABPC1	51	51	20569	23.7243	0.866274	0.152259	0.146543
KEGG_PATHWAY	hsa05169:Epstein-Barr virus infection	6	10	0.00713683	HLA-B, HLA-C, VIM, CALR, CD3E, HLA-E	54	203	8840	4.83853	0.65603	0.0708925	0.0604252
KEGG_PATHWAY	hsa05130:Pathogenic Escherichia coli infection	6	10	0.00713683	ARPC2, NCL, TMBIM6, RHOA, ACTB, ACTG1	54	203	8840	4.83853	0.65603	0.0708925	0.0604252
UP_SEQ_FEATURE	DOMAIN:MHC class I alpha chain C-terminal	2	3.33333	0.00727517	HLA-B, HLA-C	51	3	20569	268.876	0.882276	0.152259	0.146543
GOTERM_BP_DIRECT	GO:0019882~antigen processing and presentation	3	5	0.0077502	CD8A, HLA-B, HLA-C	59	45	19734	22.2983	0.987957	0.29375	0.290647
UP_KW_BIOLOGICAL_PROCESS	KW-0375~Hydrogen ion transport	3	5	0.00789057	ATP5F1E, MT-ATP8, ATP5ME	28	57	11450	21.5226	0.179668	0.049316	0.0453708
INTERPRO	IPR011162:MHC_I/II-like_Ag-recog	3	5	0.00802007	HLA-B, HLA-C, HLA-E	60	47	20607	21.9223	0.812673	0.254508	0.250837
KEGG_PATHWAY	hsa04015:Rap1 signaling pathway	6	10	0.00853245	RAC2, EVL, CALM1, RHOA, ACTB, ACTG1	54	212	8840	4.63312	0.721069	0.0794584	0.0677263
INTERPRO	IPR011331:Ribosomal_eL37/eL43	2	3.33333	0.00856516	RPL37A, RPL37	60	3	20607	228.967	0.832911	0.254508	0.250837
GOTERM_BP_DIRECT	GO:0021549~cerebellum development	3	5	0.00878094	HSPA8, MT-ND4, CD3E	59	48	19734	20.9047	0.993326	0.29375	0.290647
GOTERM_BP_DIRECT	GO:0021762~substantia nigra development	3	5	0.00878094	CALM1, RHOA, ACTB	59	48	19734	20.9047	0.993326	0.29375	0.290647
GOTERM_BP_DIRECT	GO:0033144~negative regulation of intracellular steroid hormone receptor signaling pathway	2	3.33333	0.00879182	CALR, RHOA	59	3	19734	222.983	0.993368	0.29375	0.290647
GOTERM_MF_DIRECT	GO:0046977~TAP binding	2	3.33333	0.00898709	HLA-B, HLA-C	59	3	19304	218.124	0.744155	0.113087	0.107096
KEGG_PATHWAY	hsa00190:Oxidative phosphorylation	5	8.33333	0.00921694	MT-ND4, MT-ND3, ATP5F1E, MT-ATP8, ATP5ME	54	138	8840	5.93129	0.748344	0.0807838	0.068856
SMART	SM00407:IGc1	3	5	0.00935309	HLA-B, HLA-C, HLA-E	22	75	10692	19.44	0.238539	0.27124	0.27124
UP_SEQ_FEATURE	REGION:VL9 epitope	2	3.33333	0.00968868	HLA-B, HLA-C	51	4	20569	201.657	0.942307	0.188434	0.181359
KEGG_PATHWAY	hsa05418:Fluid shear stress and atherosclerosis	5	8.33333	0.00992312	RAC2, CALM1, RHOA, ACTB, ACTG1	54	141	8840	5.8051	0.773708	0.0821414	0.0700131
UP_SEQ_FEATURE	ZN_FING:C4-type	3	5	0.0102899	RPS27, RPL37A, RPL37	51	63	20569	19.2054	0.951711	0.188434	0.181359
KEGG_PATHWAY	hsa05166:Human T-cell leukemia virus 1 infection	6	10	0.0104835	LCK, HLA-B, HLA-C, CALR, CD3E, HLA-E	54	223	8840	4.40458	0.792014	0.0822126	0.0700738
GOTERM_CC_DIRECT	GO:0031252~cell leading edge	3	5	0.0106009	ARPC2, VIM, PABPC1	59	56	20887	18.9652	0.88007	0.0727444	0.062509
KEGG_PATHWAY	hsa05100:Bacterial invasion of epithelial cells	4	6.66667	0.0112828	ARPC2, RHOA, ACTB, ACTG1	54	78	8840	8.39506	0.815608	0.0840567	0.0716457
GOTERM_BP_DIRECT	GO:0050766~positive regulation of phagocytosis	3	5	0.0114093	HSPA8, PTPRC, CALR	59	55	19734	18.2441	0.998523	0.349933	0.346237
GOTERM_BP_DIRECT	GO:0150111~regulation of transepithelial transport	2	3.33333	0.0117055	ACTB, ACTG1	59	4	19734	167.237	0.998754	0.349933	0.346237
GOTERM_CC_DIRECT	GO:0012507~ER to Golgi transport vesicle membrane	3	5	0.0117157	HLA-B, HLA-C, HLA-E	59	59	20887	18.0009	0.90417	0.0777139	0.0667793
BIOCARTA	h_cskPathway:Activation of Csk by cAMP-dependent Protein Kinase Inhibits Signaling through the T Cell Receptor	3	5	0.0125033	PTPRC, LCK, CD3E	14	22	1623	15.8084	0.558616	0.270906	0.270906
GOTERM_BP_DIRECT	GO:0042110~T cell activation	3	5	0.0134722	PTPRC, CD8A, CD3E	59	60	19734	16.7237	0.999549	0.382611	0.378569
UP_KW_BIOLOGICAL_PROCESS	KW-0507~mRNA processing	5	8.33333	0.0139705	HSPA8, SF3B2, HNRNPK, HNRNPF, PABPC1	28	403	11450	5.07356	0.296526	0.0698523	0.0642641
UP_SEQ_FEATURE	CARBOHYD:O-linked (GlcNAc) tyrosine; by Photorhabdus PAU_02230	2	3.33333	0.0144985	RAC2, RHOA	51	6	20569	134.438	0.986145	0.249885	0.240504
GOTERM_MF_DIRECT	GO:0042605~peptide antigen binding	3	5	0.0158752	HLA-B, HLA-C, HLA-E	59	64	19304	15.3369	0.910756	0.184396	0.174627
GOTERM_CC_DIRECT	GO:0005911~cell-cell junction	4	6.66667	0.0165213	WDR1, CD3E, ACTB, ACTG1	59	193	20887	7.33714	0.963673	0.106056	0.0911334
GOTERM_BP_DIRECT	GO:1901224~positive regulation of non-canonical NF-kappaB signal transduction	3	5	0.0166099	LAPTM5, CALR, RHOA	59	67	19734	14.9765	0.999926	0.432363	0.427796
INTERPRO	IPR003006:Ig/MHC_CS	3	5	0.01672	HLA-B, HLA-C, HLA-E	60	69	20607	14.9326	0.970018	0.434721	0.428451
KEGG_PATHWAY	hsa04144:Endocytosis	6	10	0.0170539	HSPA8, ARPC2, HLA-B, HLA-C, RHOA, HLA-E	54	252	8840	3.89771	0.922923	0.121001	0.103135
GOTERM_BP_DIRECT	GO:0042270~protection from natural killer cell mediated cytotoxicity	2	3.33333	0.0175077	HLA-B, HLA-E	59	6	19734	111.492	0.999956	0.432363	0.427796
GOTERM_BP_DIRECT	GO:0033119~negative regulation of RNA splicing	2	3.33333	0.0175077	RPS26, TMBIM6	59	6	19734	111.492	0.999956	0.432363	0.427796
KEGG_PATHWAY	hsa04520:Adherens junction	4	6.66667	0.018076	RAC2, RHOA, ACTB, ACTG1	54	93	8840	7.04102	0.933991	0.122424	0.104348
GOTERM_CC_DIRECT	GO:0097433~dense body	2	3.33333	0.0192795	ACTB, ACTG1	59	7	20887	101.148	0.979227	0.119894	0.103025
INTERPRO	IPR043129:ATPase_NBD	3	5	0.0195627	HSPA8, ACTB, ACTG1	60	75	20607	13.738	0.983582	0.43794	0.431624
GOTERM_BP_DIRECT	GO:0043297~apical junction assembly	2	3.33333	0.0203962	WDR1, RHOA	59	7	19734	95.5642	0.999992	0.48271	0.477611
INTERPRO	IPR003597:Ig_C1-set	3	5	0.0210548	HLA-B, HLA-C, HLA-E	60	78	20607	13.2096	0.98804	0.43794	0.431624
KEGG_PATHWAY	hsa05330:Allograft rejection	3	5	0.0216045	HLA-B, HLA-C, HLA-E	54	38	8840	12.924	0.961394	0.139959	0.119294
GOTERM_CC_DIRECT	GO:0036464~cytoplasmic ribonucleoprotein granule	3	5	0.0223345	NCL, PABPC1, ACTB	59	83	20887	12.7958	0.988835	0.134684	0.115733
GOTERM_BP_DIRECT	GO:0006919~activation of cysteine-type endopeptidase activity involved in apoptotic process	3	5	0.022633	RPS27, LCK, LAPTM5	59	79	19734	12.7016	0.999998	0.508499	0.503127
UP_KW_PTM	KW-0832~Ubl conjugation	17	28.3333	0.0230401	HSPA8, SF3B2, RPS8, RPL34, RHOA, ACTB, PKM, HNRNPK, HNRNPF, NCL, RPL35, TMBIM6, RPL38, VIM, RPS2, CALM1, RPS21	52	2701	14252	1.72503	0.342674	0.109441	0.0921605
GOTERM_BP_DIRECT	GO:1901164~negative regulation of trophoblast cell migration	2	3.33333	0.0232764	ARHGDIB, CALR	59	8	19734	83.6186	0.999998	0.508499	0.503127
KEGG_PATHWAY	hsa05020:Prion disease	6	10	0.0248998	HSPA8, MT-ND4, RAC2, MT-ND3, ATP5F1E, MT-ATP8	54	278	8840	3.53317	0.976647	0.154586	0.131761
GOTERM_BP_DIRECT	GO:0001738~morphogenesis of a polarized epithelium	2	3.33333	0.0261482	ACTB, ACTG1	59	9	19734	74.3277	1	0.550081	0.54427
KEGG_PATHWAY	hsa04940:Type I diabetes mellitus	3	5	0.0272293	HLA-B, HLA-C, HLA-E	54	43	8840	11.4212	0.983648	0.162287	0.138325
UP_SEQ_FEATURE	DOMAIN:RRM 2	3	5	0.0284096	HNRNPF, NCL, PABPC1	51	108	20569	11.2032	0.999785	0.438106	0.421658
UP_SEQ_FEATURE	DOMAIN:RRM 1	3	5	0.0284096	HNRNPF, NCL, PABPC1	51	108	20569	11.2032	0.999785	0.438106	0.421658
KEGG_PATHWAY	hsa05332:Graft-versus-host disease	3	5	0.028418	HLA-B, HLA-C, HLA-E	54	44	8840	11.1616	0.986372	0.162857	0.138811
GOTERM_CC_DIRECT	GO:0072562~blood microparticle	4	6.66667	0.0284831	HSPA8, YWHAZ, ACTB, ACTG1	59	238	20887	5.94986	0.996819	0.16671	0.143253
GOTERM_BP_DIRECT	GO:0042981~regulation of apoptotic process	4	6.66667	0.0288403	CALR, CD3E, TPT1, ACTB	59	226	19734	5.9199	1	0.585047	0.578867
GOTERM_CC_DIRECT	GO:0000276~mitochondrial proton-transporting ATP synthase complex, coupling factor F(o)	2	3.33333	0.0301318	MT-ATP8, ATP5ME	59	11	20887	64.3667	0.997731	0.171321	0.147216
UP_KW_BIOLOGICAL_PROCESS	KW-1064~Adaptive immunity	5	8.33333	0.0308409	CD8A, HLA-B, HLA-C, CD3E, HLA-E	28	513	11450	3.98566	0.543041	0.128504	0.118223
GOTERM_BP_DIRECT	GO:0030865~cortical cytoskeleton organization	2	3.33333	0.031867	WDR1, RAC2	59	11	19734	60.8136	1	0.624154	0.617561
GOTERM_CC_DIRECT	GO:0098978~glutamatergic synapse	5	8.33333	0.0318937	HSPA8, ARPC2, YWHAZ, RHOA, ACTB	59	432	20887	4.09742	0.99842	0.176301	0.151495
KEGG_PATHWAY	hsa04670:Leukocyte transendothelial migration	4	6.66667	0.0320841	RAC2, RHOA, ACTB, ACTG1	54	116	8840	5.64496	0.992241	0.177057	0.150914
UP_KW_PTM	KW-0597~Phosphoprotein	38	63.3333	0.0322509	SF3B2, SELPLG, WDR1, RPL34, LSP1, CD3E, RPS16, FTH1, ARHGDIB, RPL35, RPLP2, RPL37, RPS2, ATP5ME, HSPA8, RPS8, CNBP, HLA-B, LAPTM5, HLA-C, YWHAZ, RHOA, HLA-E, RPS26, RPS28, PKM, RPS27, PTPRC, HNRNPK, RPS29, LCK, NCL, HNRNPF, EVL, VIM, PABPC1, CALM1, TPT1	52	8417	14252	1.23737	0.445719	0.122553	0.103203
GOTERM_MF_DIRECT	GO:0005522~profilin binding	2	3.33333	0.0325664	EVL, ACTG1	59	11	19304	59.4884	0.993258	0.351252	0.332642
GOTERM_CC_DIRECT	GO:0005884~actin filament	3	5	0.0332853	RAC2, ACTB, ACTG1	59	103	20887	10.3112	0.998813	0.179021	0.153832
KEGG_PATHWAY	hsa05415:Diabetic cardiomyopathy	5	8.33333	0.0339964	MT-ND4, RAC2, MT-ND3, ATP5F1E, MT-ATP8	54	205	8840	3.99277	0.994221	0.180909	0.154198
GOTERM_BP_DIRECT	GO:0045060~negative thymic T cell selection	2	3.33333	0.034714	PTPRC, CD3E	59	12	19734	55.7458	1	0.646364	0.639536
SMART	SM00921:MHC_II_beta	2	3.33333	0.0347967	HLA-B, HLA-C	22	18	10692	54	0.641948	0.394226	0.394226
GOTERM_CC_DIRECT	GO:0009986~cell surface	6	10	0.0354013	HSPA8, PTPRC, HLA-B, HLA-C, CALR, HLA-E	59	657	20887	3.23303	0.999233	0.185391	0.159306
UP_SEQ_FEATURE	DOMAIN:RRM 4	2	3.33333	0.0358607	NCL, PABPC1	51	15	20569	53.7752	0.999977	0.525359	0.505636
GOTERM_BP_DIRECT	GO:0071346~cellular response to type II interferon	3	5	0.0369043	VIM, CALM1, ACTG1	59	103	19734	9.74198	1	0.646364	0.639536
GOTERM_BP_DIRECT	GO:1900242~regulation of synaptic vesicle endocytosis	2	3.33333	0.0375528	ACTB, ACTG1	59	13	19734	51.4576	1	0.646364	0.639536
GOTERM_BP_DIRECT	GO:0045059~positive thymic T cell selection	2	3.33333	0.0375528	PTPRC, CD3E	59	13	19734	51.4576	1	0.646364	0.639536
GOTERM_CC_DIRECT	GO:0005730~nucleolus	9	15	0.038701	HSPA8, RPS28, RPS27, RPS16, RPS8, NCL, RPL34, RPL36, RPL35	59	1400	20887	2.27582	0.999612	0.197474	0.169689
KEGG_PATHWAY	hsa05320:Autoimmune thyroid disease	3	5	0.0400102	HLA-B, HLA-C, HLA-E	54	53	8840	9.26625	0.997721	0.20557	0.175217
GOTERM_CC_DIRECT	GO:0055038~recycling endosome membrane	3	5	0.0406711	HLA-B, HLA-C, HLA-E	59	115	20887	9.23522	0.999742	0.202339	0.173869
GOTERM_MF_DIRECT	GO:0051087~protein-folding chaperone binding	3	5	0.0411492	HSPA8, HLA-B, CALR	59	107	19304	9.17345	0.998244	0.389446	0.368813
GOTERM_MF_DIRECT	GO:0098973~structural constituent of postsynaptic actin cytoskeleton	2	3.33333	0.0412657	ACTB, ACTG1	59	14	19304	46.7409	0.998276	0.389446	0.368813
GOTERM_BP_DIRECT	GO:0007169~cell surface receptor protein tyrosine kinase signaling pathway	3	5	0.0422588	LCK, CD8A, CD3E	59	111	19734	9.03985	1	0.689989	0.682701
GOTERM_BP_DIRECT	GO:0000028~ribosomal small subunit assembly	2	3.33333	0.0432058	RPS28, RPS27	59	15	19734	44.5966	1	0.689989	0.682701
GOTERM_CC_DIRECT	GO:0015629~actin cytoskeleton	4	6.66667	0.0432396	ARPC2, LSP1, ACTB, ACTG1	59	281	20887	5.03939	0.999849	0.205712	0.176767
GOTERM_CC_DIRECT	GO:0005654~nucleoplasm	18	30	0.0434165	HSPA8, SF3B2, RPS8, YWHAZ, ACTB, RPS26, RPS28, RPS16, HNRNPK, RPS27, ARPC2, RPS29, LCK, HNRNPF, NCL, RPS2, CALM1, RPS21	59	4030	20887	1.58122	0.999854	0.205712	0.176767
UP_KW_CELLULAR_COMPONENT	KW-0138~CF(0)	2	3.33333	0.0435852	MT-ATP8, ATP5ME	58	14	17942	44.1921	0.699773	0.23536	0.217926
GOTERM_BP_DIRECT	GO:0002250~adaptive immune response	5	8.33333	0.0437317	CD8A, HLA-B, HLA-C, CD3E, HLA-E	59	452	19734	3.69994	1	0.689989	0.682701
GOTERM_MF_DIRECT	GO:0008494~translation activator activity	2	3.33333	0.0441484	RPS27, PABPC1	59	15	19304	43.6249	0.998906	0.392142	0.371366
BIOCARTA	h_tcrPathway:T Cell Receptor Signaling Pathway	3	5	0.0463609	LCK, CALM1, CD3E	14	44	1623	7.90422	0.954295	0.753364	0.753364
GOTERM_CC_DIRECT	GO:1904813~ficolin-1-rich granule lumen	3	5	0.0472523	HSPA8, PKM, FTH1	59	125	20887	8.49641	0.999934	0.215982	0.185593
KEGG_PATHWAY	hsa04810:Regulation of actin cytoskeleton	5	8.33333	0.0484939	ARPC2, RAC2, RHOA, ACTB, ACTG1	54	230	8840	3.55878	0.999393	0.240853	0.205291
GOTERM_CC_DIRECT	GO:0044305~calyx of Held	2	3.33333	0.0488402	ACTB, ACTG1	59	18	20887	39.3352	0.999953	0.215982	0.185593
GOTERM_CC_DIRECT	GO:0016586~RSC-type complex	2	3.33333	0.0488402	ACTB, ACTG1	59	18	20887	39.3352	0.999953	0.215982	0.185593
SMART	SM00361:RRM_1	2	3.33333	0.0498889	NCL, PABPC1	22	26	10692	37.3846	0.773297	0.394226	0.394226
GOTERM_CC_DIRECT	GO:0005743~mitochondrial inner membrane	5	8.33333	0.0503051	MT-ND4, MT-ND3, ATP5F1E, MT-ATP8, ATP5ME	59	501	20887	3.5331	0.999965	0.217624	0.187004
INTERPRO	IPR004001:Actin_CS	2	3.33333	0.0503209	ACTB, ACTG1	60	18	20607	38.1611	0.999978	0.872229	0.859649
INTERPRO	IPR000353:MHC_II_b_N	2	3.33333	0.0503209	HLA-B, HLA-C	60	18	20607	38.1611	0.999978	0.872229	0.859649
GOTERM_BP_DIRECT	GO:0098974~postsynaptic actin cytoskeleton organization	2	3.33333	0.0544141	ACTB, ACTG1	59	19	19734	35.2079	1	0.835329	0.826505
INTERPRO	IPR020902:Actin/actin-like_CS	2	3.33333	0.055756	ACTB, ACTG1	60	20	20607	34.345	0.999993	0.879457	0.866772
UP_SEQ_FEATURE	REPEAT:1-2	2	3.33333	0.0590644	HNRNPK, CALR	51	25	20569	32.2651	1	0.776927	0.747759
UP_SEQ_FEATURE	REPEAT:2-1	2	3.33333	0.0590644	HNRNPK, CALR	51	25	20569	32.2651	1	0.776927	0.747759
GOTERM_BP_DIRECT	GO:0006955~immune response	5	8.33333	0.0609683	CD8A, FTH1, HLA-B, HLA-C, HLA-E	59	505	19734	3.31163	1	0.911315	0.901689
INTERPRO	IPR014721:Ribsml_uS5_D2-typ_fold_subgr	2	3.33333	0.0611606	RPS16, RPS2	60	22	20607	31.2227	0.999998	0.879457	0.866772
GOTERM_MF_DIRECT	GO:0042288~MHC class I protein binding	2	3.33333	0.0612664	CD8A, HLA-E	59	21	19304	31.1606	0.999929	0.513957	0.486727
UP_SEQ_FEATURE	REPEAT:1-1	2	3.33333	0.0613545	HNRNPK, CALR	51	26	20569	31.0241	1	0.776927	0.747759
SMART	SM00268:ACTIN	2	3.33333	0.06291	ACTB, ACTG1	22	33	10692	29.4545	0.848065	0.394226	0.394226
KEGG_PATHWAY	hsa05132:Salmonella infection	5	8.33333	0.0629592	PTPRC, ARPC2, RHOA, ACTB, ACTG1	54	251	8840	3.26103	0.999938	0.300725	0.256323
GOTERM_BP_DIRECT	GO:1902600~proton transmembrane transport	3	5	0.0630449	ATP5F1E, MT-ATP8, ATP5ME	59	139	19734	7.21888	1	0.918193	0.908494
UP_SEQ_FEATURE	REPEAT:2-2	2	3.33333	0.0636391	HNRNPK, CALR	51	27	20569	29.8751	1	0.776927	0.747759
KEGG_PATHWAY	hsa04921:Oxytocin signaling pathway	4	6.66667	0.0645853	CALM1, RHOA, ACTB, ACTG1	54	154	8840	4.25204	0.999952	0.300725	0.256323
INTERPRO	IPR014745:MHC_II_a/b_N	2	3.33333	0.0665348	HLA-B, HLA-C	60	24	20607	28.6208	0.999999	0.879457	0.866772
KEGG_PATHWAY	hsa04218:Cellular senescence	4	6.66667	0.067621	HLA-B, HLA-C, CALM1, HLA-E	54	157	8840	4.17079	0.999971	0.305319	0.260238
SMART	SM00360:RRM	3	5	0.06797	HNRNPF, NCL, PABPC1	22	219	10692	6.65753	0.870143	0.394226	0.394226
GOTERM_BP_DIRECT	GO:0051893~regulation of focal adhesion assembly	2	3.33333	0.068243	RHOA, ACTG1	59	24	19734	27.8729	1	0.947834	0.937822
GOTERM_BP_DIRECT	GO:0007166~cell surface receptor signaling pathway	4	6.66667	0.0684176	PTPRC, CD8A, EVL, CD3E	59	321	19734	4.16791	1	0.947834	0.937822
INTERPRO	IPR003578:Small_GTPase_Rho	2	3.33333	0.0692105	RAC2, RHOA	60	25	20607	27.476	1	0.879457	0.866772
GOTERM_MF_DIRECT	GO:0015078~proton transmembrane transporter activity	2	3.33333	0.069712	MT-ATP8, ATP5ME	59	24	19304	27.2655	0.999982	0.554027	0.524675
GOTERM_CC_DIRECT	GO:0042613~MHC class II protein complex	2	3.33333	0.0697871	HLA-B, HLA-C	59	26	20887	27.2321	0.999999	0.295482	0.253906
KEGG_PATHWAY	hsa05014:Amyotrophic lateral sclerosis	6	10	0.0703455	MT-ND4, MT-ND3, ATP5F1E, ACTB, MT-ATP8, ACTG1	54	371	8840	2.6475	0.999981	0.308279	0.262761
UP_KW_DISEASE	KW-1274~Primary mitochondrial disease	4	6.66667	0.0710999	MT-ND4, MT-ND3, ATP5F1E, MT-ATP8	24	204	4817	3.93546	0.714587	0.604349	0.604349
INTERPRO	IPR003954:RRM_dom_euk	2	3.33333	0.0718787	NCL, PABPC1	60	26	20607	26.4192	1	0.879457	0.866772
GOTERM_CC_DIRECT	GO:0005886~plasma membrane	22	36.6667	0.0728872	HSPA8, SELPLG, WDR1, HLA-B, RPL36A, LAPTM5, HLA-C, LSP1, CD3E, RHOA, ACTB, ACTG1, HLA-E, PTPRC, LCK, CD8A, HNRNPF, NCL, RAC2, TMBIM6, VIM, CALM1	59	5592	20887	1.39277	1	0.299895	0.257699
UP_KW_DOMAIN	KW-0732~Signal	15	25	0.072916	MT-ND4, SELPLG, WDR1, HLA-B, SHISA5, HLA-C, CD3E, MT-ND3, MT-ATP8, HLA-E, RPS27, PTPRC, CD8A, RAC2, CALR	33	4410	14597	1.50454	0.565179	0.802076	0.802076
GOTERM_BP_DIRECT	GO:0050900~leukocyte migration	2	3.33333	0.0737188	SELPLG, LCK	59	26	19734	25.7288	1	0.972274	0.962004
GOTERM_CC_DIRECT	GO:0043197~dendritic spine	3	5	0.0745551	HSPA8, CD3E, RHOA	59	162	20887	6.55587	1	0.299895	0.257699
GOTERM_CC_DIRECT	GO:0031966~mitochondrial membrane	3	5	0.0753506	MT-ND4, TMBIM6, MT-ND3	59	163	20887	6.51565	1	0.299895	0.257699
KEGG_PATHWAY	hsa04971:Gastric acid secretion	3	5	0.0759028	CALM1, ACTB, ACTG1	54	76	8840	6.46199	0.999992	0.323129	0.275419
GOTERM_BP_DIRECT	GO:0002639~positive regulation of immunoglobulin production	2	3.33333	0.0764448	PTPRC, HLA-E	59	27	19734	24.7759	1	0.972274	0.962004
GOTERM_BP_DIRECT	GO:0032753~positive regulation of interleukin-4 production	2	3.33333	0.0764448	CD3E, HLA-E	59	27	19734	24.7759	1	0.972274	0.962004
GOTERM_BP_DIRECT	GO:0007015~actin filament organization	3	5	0.0770288	RAC2, EVL, RHOA	59	156	19734	6.4322	1	0.972274	0.962004
GOTERM_MF_DIRECT	GO:0023026~MHC class II protein complex binding	2	3.33333	0.078083	HSPA8, PKM	59	27	19304	24.236	0.999995	0.589526	0.558293
KEGG_PATHWAY	hsa05012:Parkinson disease	5	8.33333	0.078641	MT-ND4, CALM1, MT-ND3, ATP5F1E, MT-ATP8	54	271	8840	3.02036	0.999995	0.325486	0.277428
GOTERM_BP_DIRECT	GO:0000462~maturation of SSU-rRNA from tricistronic rRNA transcript (SSU-rRNA, 5.8S rRNA, LSU-rRNA)	2	3.33333	0.079163	RPS16, RPS8	59	28	19734	23.891	1	0.977491	0.967165
UP_SEQ_FEATURE	DOMAIN:Ig-like	5	8.33333	0.0793421	CD8A, HLA-B, HLA-C, CD3E, HLA-E	51	670	20569	3.0098	1	0.929889	0.894979
KEGG_PATHWAY	hsa04530:Tight junction	4	6.66667	0.0815131	ARPC2, RHOA, ACTB, ACTG1	54	170	8840	3.85185	0.999997	0.328255	0.279788
GOTERM_BP_DIRECT	GO:0071902~positive regulation of protein serine/threonine kinase activity	2	3.33333	0.0845757	CALM1, RHOA	59	30	19734	22.2983	1	0.980387	0.970031
GOTERM_BP_DIRECT	GO:0032703~negative regulation of interleukin-2 production	2	3.33333	0.0845757	PTPRC, LAPTM5	59	30	19734	22.2983	1	0.980387	0.970031
GOTERM_BP_DIRECT	GO:0010592~positive regulation of lamellipodium assembly	2	3.33333	0.0845757	ARPC2, RAC2	59	30	19734	22.2983	1	0.980387	0.970031
GOTERM_CC_DIRECT	GO:0016514~SWI/SNF complex	2	3.33333	0.0851992	ACTB, ACTG1	59	32	20887	22.1261	1	0.329451	0.283096
GOTERM_CC_DIRECT	GO:0035267~NuA4 histone acetyltransferase complex	2	3.33333	0.0877433	ACTB, ACTG1	59	33	20887	21.4556	1	0.329451	0.283096
GOTERM_CC_DIRECT	GO:0002102~podosome	2	3.33333	0.0877433	HNRNPK, WDR1	59	33	20887	21.4556	1	0.329451	0.283096
GOTERM_MF_DIRECT	GO:0140311~protein sequestering activity	2	3.33333	0.0891292	LAPTM5, YWHAZ	59	31	19304	21.1088	0.999999	0.640881	0.606927
GOTERM_CC_DIRECT	GO:0005791~rough endoplasmic reticulum	2	3.33333	0.0902805	PKM, RPS21	59	34	20887	20.8245	1	0.3327	0.285888
UP_KW_LIGAND	KW-0830~Ubiquinone	2	3.33333	0.0916192	MT-ND4, MT-ND3	20	35	6947	19.8486	0.739534	1	1
BIOCARTA	h_thelperPathway:T Helper Cell Surface Molecules	2	3.33333	0.0922944	PTPRC, CD3E	14	12	1623	19.3214	0.998153	1	1
GOTERM_BP_DIRECT	GO:0042771~intrinsic apoptotic signaling pathway in response to DNA damage by p53 class mediator	2	3.33333	0.0926361	RPS27, SHISA5	59	33	19734	20.2712	1	1	0.991182
GOTERM_CC_DIRECT	GO:0044853~plasma membrane raft	2	3.33333	0.0928108	SELPLG, CD8A	59	35	20887	20.2295	1	0.335806	0.288557
UP_SEQ_FEATURE	COMPBIAS:Basic residues	5	8.33333	0.0930467	SF3B2, RPS8, NCL, HLA-B, CALR	51	709	20569	2.84424	1	1	0.965753
GOTERM_BP_DIRECT	GO:0035633~maintenance of blood-brain barrier	2	3.33333	0.0953074	ACTB, ACTG1	59	34	19734	19.675	1	1	0.991182
INTERPRO	IPR004000:Actin	2	3.33333	0.0955565	ACTB, ACTG1	60	35	20607	19.6257	1	1	0.990338
UP_KW_PTM	KW-0013~ADP-ribosylation	3	5	0.0971576	RAC2, TMA7, RHOA	52	147	14252	5.59341	0.84114	0.307666	0.259087
GOTERM_BP_DIRECT	GO:0032743~positive regulation of interleukin-2 production	2	3.33333	0.097971	PTPRC, CD3E	59	35	19734	19.1128	1	1	0.991182
UP_KW_CELLULAR_COMPONENT	KW-0999~Mitochondrion inner membrane	4	6.66667	0.0986251	MT-ND4, MT-ND3, ATP5F1E, ATP5ME	58	348	17942	3.55569	0.939403	0.443813	0.410938

## Sheet: late_turquoise_GO
Category	Term	Count	%	PValue	Genes	List Total	Pop Hits	Pop Total	Fold Enrichment	Bonferroni	Benjamini	FDR
GOTERM_BP_DIRECT	GO:0002181~cytoplasmic translation	44	37.931	5.2874e-74	RPL5, RPL30, RPL3, RPL32, RPL10, RPLP1, RPL12, RPLP0, RPL11, RPL10A, RPL8, RPL9, RPL6, RPS15, RPS4X, RPL7A, RPS15A, RPS19, RPL18A, RPS18, RPL14, RACK1, RPS3, RPL13, RPS27A, RPL18, RPS13, RPS12, RPL19, RPL41, RPS9, RPS7, RPS5, RPL22, RPS6, RPS3A, RPS25, RPL24, RPL26, FAU, RPL29, RPL28, RPS24, RPS23	111	97	19734	80.6442	4.59475e-71	4.59475e-71	4.5313e-71
GOTERM_CC_DIRECT	GO:0022626~cytosolic ribosome	43	37.069	3.18517e-73	RPL5, RPL30, RPL3, RPL32, RPL10, RPLP1, RPL12, RPLP0, RPL11, RPL10A, RPL8, RPL9, RPL6, RPS15, RPS4X, RPL7A, RPS15A, RPS19, RPL18A, RPS18, RPL14, RPS3, RPL13, RPS27A, RPL18, RPS13, RPS12, RPL19, RPS9, RPS7, RPS5, RPL22, RPS6, RPS3A, EEF1A1, RPS25, RPL24, RPL26, FAU, RPL29, RPL28, RPS24, RPS23	112	94	20887	85.3097	6.30663e-71	6.30663e-71	5.57404e-71
GOTERM_BP_DIRECT	GO:0006412~translation	45	38.7931	1.19672e-59	RPL5, RPL30, RPL3, RPL32, RPL10, RPLP1, RPL12, RPLP0, RPL11, RPL10A, RPL8, RPL9, RPL6, RPS15, RPS4X, RPL7A, RPS15A, RPS19, RPL18A, RPS18, RPL14, RPS3, RPL13, RPS27A, RPL18, RPS13, RPS12, RPL19, RPL41, RPS9, RPS7, RPS5, RPL22, RPS6, RPS3A, EEF1A1, RPS25, NACA, RPL24, RPL26, FAU, RPL29, RPL28, RPS24, RPS23	111	202	19734	39.6053	1.03995e-56	5.19975e-57	5.12794e-57
GOTERM_MF_DIRECT	GO:0003735~structural constituent of ribosome	43	37.069	3.4769e-56	RPL5, RPL30, RPL3, RPL32, RPL10, RPLP1, RPL12, RPLP0, RPL11, RPL10A, RPL8, RPL9, RPL6, RPS15, RPS4X, RPL7A, RPS15A, RPS19, RPL18A, RPS18, RPL14, RPS3, RPL13, RPS27A, RPL18, RPS13, RPS12, RPL19, RPL41, RPS9, RPS7, RPS5, RPL22, RPS6, RPS3A, RPS25, RPL24, RPL26, FAU, RPL29, RPL28, RPS24, RPS23	113	191	19304	38.4595	8.55317e-54	8.55317e-54	8.27502e-54
UP_KW_MOLECULAR_FUNCTION	KW-0689~Ribosomal protein	44	37.931	2.91961e-54	RPL5, RPL30, RPL3, RPL32, RPL10, RPLP1, RPL12, RPLP0, RPL11, RPL10A, RPL8, RPL9, RPL6, RPS15, RPS4X, RPL7A, RPS15A, RPS19, RPL18A, RPS18, RPL14, RACK1, RPS3, RPL13, RPS27A, RPL18, RPS13, RPS12, RPL19, RPL41, RPS9, RPS7, RPS5, RPL22, RPS6, RPS3A, RPS25, RPL24, RPL26, FAU, RPL29, RPL28, RPS24, RPS23	89	197	11889	29.8361	1.19704e-52	1.19704e-52	1.19704e-52
KEGG_PATHWAY	hsa03010:Ribosome	43	37.069	1.47403e-51	RPL5, RPL30, RPL3, RPL32, RPL10, RPLP1, RPL12, RPLP0, RPL11, RPL10A, RPL8, RPL9, RPL6, RPS15, RPS4X, RPL7A, RPS15A, RPS19, RPL18A, RPS18, RPL14, RPS3, RPL13, RPS27A, RPL18, RPS13, RPS12, RPL19, RPL41, RPS9, RPS7, RPS5, RPL22, RPS6, RPS3A, RPS25, RPL24, RPL26, FAU, RPL29, RPL28, RPS24, RPS23	83	172	8840	26.6265	2.10786e-49	2.10786e-49	2.10786e-49
KEGG_PATHWAY	hsa05171:Coronavirus disease - COVID-19	43	37.069	4.5888e-45	RPL5, RPL30, RPL3, RPL32, RPL10, RPLP1, RPL12, RPLP0, RPL11, RPL10A, RPL8, RPL9, RPL6, RPS15, RPS4X, RPL7A, RPS15A, RPS19, RPL18A, RPS18, RPL14, RPS3, RPL13, RPS27A, RPL18, RPS13, RPS12, RPL19, RPL41, RPS9, RPS7, RPS5, RPL22, RPS6, RPS3A, RPS25, RPL24, RPL26, FAU, RPL29, RPL28, RPS24, RPS23	83	238	8840	19.2427	6.56198e-43	3.28099e-43	3.28099e-43
UP_KW_MOLECULAR_FUNCTION	KW-0687~Ribonucleoprotein	44	37.931	8.71765e-45	RPL5, RPL30, RPL3, RPL32, RPL10, RPLP1, RPL12, RPLP0, RPL11, RPL10A, RPL8, RPL9, RPL6, RPS15, RPS4X, RPL7A, RPS15A, RPS19, RPL18A, RPS18, RPL14, RACK1, RPS3, RPL13, RPS27A, RPL18, RPS13, RPS12, RPL19, RPL41, RPS9, RPS7, RPS5, RPL22, RPS6, RPS3A, RPS25, RPL24, RPL26, FAU, RPL29, RPL28, RPS24, RPS23	89	316	11889	18.6003	3.57424e-43	1.78712e-43	1.78712e-43
GOTERM_CC_DIRECT	GO:0022625~cytosolic large ribosomal subunit	25	21.5517	1.1246e-36	RPL5, RPL30, RPL3, RPL32, RPL10, RPLP1, RPL12, RPLP0, RPL11, RPL10A, RPL8, RPL9, RPL6, RPL7A, RPL18A, RPL14, RPL13, RPL18, RPL19, RPL41, RPL22, RPL24, RPL26, RPL29, RPL28	112	78	20887	59.7728	2.2267e-34	1.11335e-34	9.84022e-35
GOTERM_CC_DIRECT	GO:0022627~cytosolic small ribosomal subunit	19	16.3793	9.82983e-29	RPS9, RPS7, RPS5, RPS6, RPS3A, RPS15, RPS4X, RPS25, RPS15A, RPS19, RPS18, RPS3, RACK1, FAU, RPS27A, RPS24, RPS13, RPS23, RPS12	112	52	20887	68.141	1.94631e-26	6.48769e-27	5.73407e-27
GOTERM_MF_DIRECT	GO:0003723~RNA binding	52	44.8276	5.91235e-28	RPL5, RPL30, RPL3, RPL32, RPLP0, RPL10A, RPL8, RPL9, RPL6, RPS4X, RPS15, RPL7A, RPS19, RPL18A, RPS18, RACK1, RPS13, RPS12, CAST, RPS9, RPS7, RPS5, RPL22, RPS6, NOSIP, RPS3A, HLA-A, EEF1A1, RPL24, S100A4, RPL26, RPL29, PFN1, RPL28, RPL10, RPL12, RPL11, JAKMIP1, RPS15A, UBC, RPS3, RPL14, RPL13, RPS27A, RPL18, RPL19, NPM1, RPL41, RPS25, FAU, RPS24, RPS23	113	1455	19304	6.10533	1.45444e-25	7.27219e-26	7.0357e-26
GOTERM_CC_DIRECT	GO:0005840~ribosome	22	18.9655	1.4386e-26	RPL41, RPS9, RPL10, RPS7, RPLP1, RPS5, RPL22, RPS6, RPS3A, RPL9, RPL6, RPS4X, EEF1A1, RPL7A, RPS25, RPS19, RPS18, RPS3, RACK1, RPS27A, RPS13, RPS23	112	118	20887	34.7695	2.84842e-24	7.12105e-25	6.29386e-25
GOTERM_CC_DIRECT	GO:0005925~focal adhesion	30	25.8621	5.68863e-24	RPL5, RPL30, RPL3, RPLP1, RPL12, RPLP0, ITGB2, RPL10A, RPL8, RPL9, RPL6, RPS15, RPS4X, RPL7A, RPS19, RPS18, RPS3, CAPN2, RPL18, B2M, RPS13, RPL19, NPM1, RPS9, RPS7, RPS5, RPL22, ANXA5, RPS3A, PFN1	112	435	20887	12.8615	1.12635e-21	2.2527e-22	1.99102e-22
GOTERM_CC_DIRECT	GO:0070062~extracellular exosome	50	43.1034	2.49705e-19	SPON2, RPL5, RPL30, RPL3, RPLP0, ITGB2, FASLG, RPL10A, RPS4X, FCGR3A, RPS19, RPS18, RACK1, CAPN2, SH3BGRL3, CLIC1, B2M, RPS13, RPS9, RPS5, ANXA4, RPL22, ANXA5, RPS3A, HLA-A, TGFBR3, FGR, EEF1A1, S100A6, RPL24, S100A4, RPL26, PFN1, RPL28, RPL12, RPL11, IQGAP2, LDHB, RPS15A, UBC, RPS3, RPL14, CD58, RPS27A, S100A11, S100A10, CD74, PSMB9, RPS25, NACA	112	2258	20887	4.12956	4.94415e-17	8.24025e-18	7.28305e-18
GOTERM_BP_DIRECT	GO:0042274~ribosomal small subunit biogenesis	15	12.931	6.01248e-18	NPM1, RPS9, RPS7, RPS5, RPS6, RPS3A, RPS15, RPS4X, RPS25, RPS15A, RPS19, RPS24, RPS13, RPS23, RPS12	111	76	19734	35.0889	5.22484e-15	1.74161e-15	1.71756e-15
GOTERM_CC_DIRECT	GO:0005737~cytoplasm	74	63.7931	3.92544e-17	RPL5, RPL30, RPL3, RPL32, RPLP1, RPLP0, PLEK, RPL10A, RPL8, RPL9, RPL6, EEF1B2, RPS15, RPL7A, RPS19, RPL18A, RPS18, MYC, RACK1, CAPN2, SH3BGRL3, CLIC1, RPS13, RPS12, CAST, ZNF683, GBP5, RPS9, RPS7, RPS5, ANXA4, RPL22, RPS6, ANXA5, NOSIP, RPS3A, FGR, EEF1A1, PTP4A2, EEF1D, IRF1, S100A6, RPL24, RPL26, RPL29, PFN1, RPL28, RPL12, LEF1, RPL11, IQGAP2, JAKMIP1, LDHB, RPS15A, UBC, RPS3, RPL14, RPL13, RP…	112	5754	20887	2.39839	7.77237e-15	1.11034e-15	9.8136e-16
UP_KW_PTM	KW-1017~Isopeptide bond	49	42.2414	6.14557e-17	RPL5, RPL30, RPL3, RPL32, RPLP1, RPLP0, RPL10A, RPL8, RPL6, EEF1B2, RPS4X, RPS15, RPL7A, RPL18A, RPS18, MYC, RPS13, CAST, RPS9, RPS7, RPS5, RPS6, ANXA5, RPS3A, CYBA, EEF1A1, ZEB2, IRF1, RPL24, RPL26, PFN1, RPL28, RPL10, RPL12, LEF1, RPL11, UBC, RPS3, RPL14, RPL13, RPS27A, RPL18, S100A10, RPL19, NPM1, NACA, PDCD1, RPS24, RPS23	103	1876	14252	3.61411	2.33147e-15	1.35203e-15	1.29057e-15
UP_SEQ_FEATURE	CROSSLNK:Glycyl lysine isopeptide (Lys-Gly) (interchain with G-Cter in SUMO2); alternate	21	18.1034	2.67407e-15	RPL5, NPM1, RPL30, RPL3, RPS7, RPS5, ANXA5, RPL11, RPLP0, RPS3A, RPL10A, RPL7A, ZEB2, RPS18, NACA, MYC, RPS3, RPL24, RPL13, PFN1, S100A10	111	350	20569	11.1184	1.21769e-12	1.22205e-12	1.21938e-12
GOTERM_CC_DIRECT	GO:0032040~small-subunit processome	13	11.2069	7.63418e-15	RPS9, RPS7, RPS5, RPS6, RPS3A, RPS4X, RPS15A, RPS19, RPS27A, RPS24, RPS13, RPS23, RPS12	112	77	20887	31.4855	1.51679e-12	1.88946e-13	1.66998e-13
GOTERM_CC_DIRECT	GO:0016020~membrane	66	56.8966	1.00254e-14	RPL5, RPL30, RPL32, RPLP0, PLEK, ITGB2, FASLG, CTSW, RPL10A, RPL8, RPL9, RPL6, RPS4X, RPS15, RPL7A, FCGR3A, RPS19, RPL18A, RPS18, MYC, CLIC1, B2M, RPS13, RPS12, CAST, GBP5, RPS9, RPS7, RPS5, ANXA4, RPS6, ANXA5, CYBA, HLA-A, EMP3, TNFRSF1B, EEF1A1, RPL24, RPL26, LTB, RPL29, PFN1, RPL28, RPL10, RPL12, RPL11, IQGAP2, JAKMIP1, LDHB, RPS15A, RPS3, RPL14, RPL13, TSPAN2, CD58, TIGIT, RPS27A, RPL18, S100…	112	5048	20887	2.43827	1.97842e-12	2.2056e-13	1.94939e-13
GOTERM_CC_DIRECT	GO:1990904~ribonucleoprotein complex	17	14.6552	2.15667e-14	RPL5, NPM1, RPL41, RPS9, RPS7, RPLP1, RPS5, RPL22, RPS6, RPLP0, RPS3A, JAKMIP1, RPS4X, RPS3, RACK1, RPL26, RPS27A	112	210	20887	15.0969	4.26459e-12	4.2702e-13	3.77417e-13
GOTERM_CC_DIRECT	GO:0005829~cytosol	69	59.4828	3.98909e-14	RPL5, RPL30, RPL3, RPL32, RPLP1, RPLP0, PLEK, RPL10A, RPL8, RPL9, RPL6, EEF1B2, RPS4X, RPS15, RPL7A, RPS19, RPL18A, RPS18, RACK1, CAPN2, SH3BGRL3, B2M, RPS13, RPS12, CAST, RPS9, RPS7, RPS5, RPL22, RPS6, ANXA5, NOSIP, RPS3A, FGR, EEF1A1, PTP4A2, ZEB2, EEF1D, IRF1, S100A6, RPL24, S100A4, RPL26, RPL29, PFN1, RPL28, RPL10, RPL12, RPL11, IQGAP2, LDHB, RPS15A, UBC, RPS3, RPL14, RPL13, RPS27A, RPL18, RP…	112	5649	20887	2.2779	7.89169e-12	7.18036e-13	6.34627e-13
UP_KW_PTM	KW-0832~Ubl conjugation	53	45.6897	2.95008e-13	RPL5, RPL30, RPL3, RPL32, RPLP1, RPLP0, FASLG, RPL10A, RPL8, RPL6, EEF1B2, RPS4X, RPS15, RPL7A, RPL18A, RPS18, MYC, RPS13, CAST, RPS9, RPS7, RPS5, RPS6, ANXA5, RPS3A, CYBA, HLA-A, FGR, EEF1A1, ZEB2, IRF1, RPL24, RPL26, PFN1, RPL28, RPL10, RPL12, LEF1, RPL11, UBC, RPS3, RPL14, RPL13, RPS27A, RPL18, S100A10, RPL19, NPM1, SYT11, NACA, PDCD1, RPS24, RPS23	103	2701	14252	2.71513	6.19471e-12	3.24509e-12	3.09758e-12
UP_SEQ_FEATURE	CROSSLNK:Glycyl lysine isopeptide (Lys-Gly) (interchain with G-Cter in SUMO2)	32	27.5862	4.90476e-13	RPL3, RPL32, RPL10, RPL12, RPL11, RPL10A, RPL8, RPL6, RPS15, EEF1B2, RPS4X, RPL7A, RPL18A, RPS18, MYC, RPL14, RPS3, RPL13, RPL18, RPS13, CAST, NPM1, RPS9, RPS7, RPS6, ZEB2, IRF1, RPL24, RPL26, RPL28, RPS24, RPS23	111	1277	20569	4.64354	2.24157e-10	1.12074e-10	1.11829e-10
UP_KW_DISEASE	KW-1024~Diamond-Blackfan anemia	8	6.89655	5.52252e-12	RPL5, RPS15A, RPS7, RPS19, RPL11, RPL26, RPL18, RPS24	28	20	4817	68.8143	1.10449e-10	1.1045e-10	1.1045e-10
GOTERM_CC_DIRECT	GO:0015935~small ribosomal subunit	7	6.03448	9.45878e-11	RPS4X, RPS25, RPS18, RPS6, RACK1, FAU, RPS24	112	15	20887	87.0292	1.87284e-08	1.5607e-09	1.37941e-09
GOTERM_CC_DIRECT	GO:0005730~nucleolus	29	25	6.76581e-10	RPL5, RPL3, RPL12, RPL11, RPS4X, RPL7A, RPS15A, RPS19, MYC, RPS3, RPL13, RPS27A, RPL18, RPS13, RPS12, RPL19, NPM1, RPS9, RPS7, RPS5, PYHIN1, RPS6, RPS3A, EEF1A1, RPS25, ZEB2, RPL26, RPS24, RPS23	112	1400	20887	3.86303	1.33963e-07	1.03048e-08	9.10782e-09
UP_KW_PTM	KW-0007~Acetylation	55	47.4138	7.06346e-10	RPL5, RPL30, RPL3, RPLP1, PLEK, RPL10A, RPL9, RPL6, EEF1B2, RPS4X, RPS15, RPL7A, RPS19, RPS18, MYC, RACK1, CAPN2, EFHD2, SH3BGRL3, CLIC1, RPS13, RPS12, CAST, RPS9, RPS7, RPS5, ANXA4, RPS6, ANXA5, RPS3A, EEF1A1, ZEB2, EEF1D, IRF1, S100A6, RPL24, S100A4, RPL29, PFN1, RPL28, RPL12, RPL11, LDHB, RPS3, RPL14, RPL13, RPS27A, S100A11, S100A10, NPM1, PSMB9, RPS25, NACA, RPS24, RPS23	103	3511	14252	2.16756	1.48333e-08	5.17987e-09	4.94442e-09
GOTERM_CC_DIRECT	GO:0009897~external side of plasma membrane	17	14.6552	1.04143e-09	CX3CR1, CD74, GPR25, FCRL6, ITGB2, ANXA5, FASLG, HLA-A, TGFBR3, FCGR3A, SELL, CAPN2, SLAMF7, CCR7, PDCD1, IL7R, B2M	112	429	20887	7.39009	2.06203e-07	1.47288e-08	1.30179e-08
GOTERM_MF_DIRECT	GO:0005515~protein binding	102	87.931	2.74971e-09	SPON2, RPL5, RPL30, RPL3, RPL10A, RPL8, RPL9, RPL6, RPS15, EEF1B2, RPS19, RPL18A, RPS18, MYC, CAPN2, B2M, RPS13, RPS12, CAST, ZNF683, GBP5, RPS9, RPS7, RPS5, RPL22, RPS6, F2R, NOSIP, CYBA, HLA-A, EEF1A1, S100A6, RPL24, S100A4, RPL26, PFN1, RPL28, TCF7, LDHB, UBC, SARAF, TSPAN2, S100A11, S100A10, RPL41, HOPX, RPS25, SELL, NACA, IL7R, RPS23, GPR25, RPLP1, RPLP0, ITGB2, PLEK, FASLG, RPS4X, RPL7A, FC…	113	12754	19304	1.36623	6.76428e-07	2.25476e-07	2.18143e-07
GOTERM_CC_DIRECT	GO:0014069~postsynaptic density	13	11.2069	7.00096e-09	RPL30, RPL12, RPLP0, RPL10A, RPL8, RPL6, RPS25, RPS19, SYT11, RPS18, RPS3, RPL14, RPS13	112	244	20887	9.936	1.38619e-06	9.24127e-08	8.16779e-08
UP_KW_CELLULAR_COMPONENT	KW-0963~Cytoplasm	64	55.1724	8.43915e-09	RPL5, RPL30, RPL3, RPL32, RPLP0, RPL10A, RPL8, RPL9, RPL6, RPS4X, RPS15, RPL7A, RPS19, RPL18A, RPS18, MYC, RACK1, CAPN2, SH3BGRL3, CLIC1, RPS13, RPS12, GBP5, RPS9, RPS7, RPS5, RPL22, RPS6, NOSIP, RPS3A, FGR, EEF1A1, PTP4A2, IRF1, S100A6, RPL24, S100A4, RPL26, RPL29, PFN1, RPL28, RPL10, RPL12, RPL11, JAKMIP1, LDHB, RPS15A, UBC, RPS3, RPL14, RPL13, RPS27A, RPL18, S100A11, RPL19, NPM1, RPL41, HOPX, …	107	5805	17942	1.84869	2.10979e-07	2.10979e-07	2.10979e-07
GOTERM_BP_DIRECT	GO:0006364~rRNA processing	10	8.62069	3.82202e-08	RPS15, RPS25, RPL5, RPS7, RPS19, RPS6, RPL11, RPL14, RPL26, RPS24	111	127	19734	13.9987	3.32128e-05	8.30333e-06	8.18867e-06
GOTERM_CC_DIRECT	GO:0045202~synapse	16	13.7931	7.41333e-08	RPS9, RPS7, RPS5, RPS3A, RPS15, RPS4X, RPL7A, RPS15A, SYT11, RPL24, RPL13, RPL26, RPS27A, RPL28, RPS23, RPL19	112	505	20887	5.90863	1.46783e-05	9.17399e-07	8.10833e-07
GOTERM_BP_DIRECT	GO:0006955~immune response	16	13.7931	1.35704e-07	IL32, CX3CR1, GPR25, FCRL6, GZMA, TCF7, FASLG, CTSW, HLA-A, TNFRSF1B, TGFBR3, FCGR3A, CCR7, LTB, IL7R, B2M	111	505	19734	5.63275	0.00011792	2.35853e-05	2.32596e-05
GOTERM_MF_DIRECT	GO:0019843~rRNA binding	7	6.03448	2.2577e-07	RPS4X, NPM1, RPS9, RPS18, RPS5, RPL8, RPL9	113	45	19304	26.5738	5.5538e-05	1.38849e-05	1.34333e-05
GOTERM_CC_DIRECT	GO:0005783~endoplasmic reticulum	23	19.8276	2.35266e-07	CAST, RPL5, RPL41, RPL10, RPS7, RPS6, RPLP0, RPS3A, CTSW, HLA-A, EEF1B2, EEF1D, RPS3, CAPN2, RPL24, SARAF, RPL13, SLAMF7, RPL18, CLIC1, B2M, RPS24, RPS23	112	1185	20887	3.61966	4.65817e-05	2.74016e-06	2.42186e-06
GOTERM_MF_DIRECT	GO:0048027~mRNA 5'-UTR binding	6	5.17241	3.58648e-07	RPL5, RPL41, RPS7, RPS3A, RPL26, RPS13	113	26	19304	39.4227	8.82236e-05	1.76455e-05	1.70717e-05
UP_KW_MOLECULAR_FUNCTION	KW-0699~rRNA-binding	6	5.17241	2.04511e-06	RPS4X, RPL5, RPS9, RPS18, RPL11, RPL8	89	29	11889	27.6381	8.3846e-05	2.79498e-05	2.79498e-05
GOTERM_BP_DIRECT	GO:0000027~ribosomal large subunit assembly	5	4.31034	2.63302e-06	RPL5, RPL10, RPL11, RPLP0, RPL6	111	18	19734	49.3844	0.00228548	0.000381349	0.000376083
UP_SEQ_FEATURE	CROSSLNK:Glycyl lysine isopeptide (Lys-Gly) (interchain with G-Cter in ubiquitin)	11	9.48276	6.12951e-06	EEF1A1, RPL10, RPLP1, RPL12, UBC, RPLP0, RPS3, CYBA, PDCD1, RPS27A, RPS13	111	308	20569	6.61808	0.00279727	0.000933728	0.000931685
INTERPRO	IPR014722:Rib_uL2_dom2	5	4.31034	6.76056e-06	RPS4X, RPL14, RPL26, RPL8, RPL6	113	23	20607	39.6441	0.00292305	0.00292732	0.00290028
GOTERM_MF_DIRECT	GO:1990948~ubiquitin ligase inhibitor activity	4	3.44828	2.21486e-05	RPS15, RPL5, RPS7, RPL11	113	10	19304	68.3327	0.0054338	0.000900209	0.000870934
UP_KW_BIOLOGICAL_PROCESS	KW-0391~Immunity	14	12.069	2.46584e-05	EOMES, ZNF683, CX3CR1, GBP5, CD74, SPON2, HLA-A, PSMB9, FGR, FCGR3A, IRF1, SLAMF7, PDCD1, B2M	43	963	11450	3.87114	0.000788767	0.000789068	0.000739751
GOTERM_MF_DIRECT	GO:0045296~cadherin binding	11	9.48276	2.56157e-05	CAST, RPL7A, EEF1D, RPL14, EFHD2, RACK1, RPL24, PFN1, RPL29, CLIC1, RPL6	113	335	19304	5.6094	0.00628173	0.000900209	0.000870934
UP_KW_LIGAND	KW-0106~Calcium	13	11.2069	3.182e-05	SPON2, ANXA4, ITGB2, ANXA5, ATP2B4, SELL, SYT11, S100A6, EFHD2, CAPN2, SARAF, S100A4, S100A11	25	984	6947	3.67118	0.000445388	0.00044548	0.00044548
GOTERM_BP_DIRECT	GO:0042273~ribosomal large subunit biogenesis	5	4.31034	6.46731e-05	RPL5, NPM1, RPL11, RPL14, RPL26	111	39	19734	22.7928	0.0546525	0.0080287	0.00791783
INTERPRO	IPR008991:Translation_prot_SH3-like_sf	4	3.44828	8.31239e-05	RPL14, RPL26, RPL8, RPL6	113	16	20607	45.5907	0.0353541	0.0179963	0.0178301
GOTERM_CC_DIRECT	GO:0005654~nucleoplasm	39	33.6207	0.00014371	RPL5, TCF7, LEF1, RPL11, RPL8, RPS15, RPS4X, RPS15A, RPS19, RPS18, MYC, UBC, RACK1, RPS3, TSPAN2, RPS27A, RPS13, RPS12, EOMES, NPM1, RPS9, RPS7, RPS5, PYHIN1, RPS6, NOSIP, RPS3A, PSMB9, FGR, RPS25, ZEB2, EEF1D, IRF1, S100A4, RPL26, FAU, IL7R, RPS24, RPS23	112	4030	20887	1.80475	0.0280555	0.00158081	0.00139718
GOTERM_BP_DIRECT	GO:0006414~translational elongation	4	3.44828	0.000153009	EEF1A1, EEF1B2, EEF1D, RPLP1	111	19	19734	37.4282	0.124513	0.0166206	0.0163911
GOTERM_CC_DIRECT	GO:0005853~eukaryotic translation elongation factor 1 complex	3	2.58621	0.000166766	EEF1A1, EEF1B2, EEF1D	112	4	20887	139.868	0.0324832	0.00173788	0.00153601
INTERPRO	IPR001751:S100/CaBP7/8-like_CS	4	3.44828	0.000329448	S100A6, S100A4, S100A11, S100A10	113	25	20607	29.1781	0.132964	0.0475504	0.0471111
BIOCARTA	h_mhcPathway:Antigen Processing and Presentation	4	3.44828	0.000381414	CD74, HLA-A, B2M, PSMB9	24	11	1623	24.5909	0.0252357	0.0255548	0.0255548
UP_SEQ_FEATURE	CROSSLNK:Glycyl lysine isopeptide (Lys-Gly) (interchain with G-Cter in SUMO1); alternate	7	6.03448	0.00044216	RPL5, NPM1, RPL3, ANXA5, RPLP0, RPL13, RPL10A	111	182	20569	7.12717	0.182997	0.0505168	0.0504063
INTERPRO	IPR013787:S100_Ca-bd_sub	4	3.44828	0.000463715	S100A6, S100A4, S100A11, S100A10	113	28	20607	26.0518	0.181953	0.0501971	0.0497334
SMART	SM01394:S_100	4	3.44828	0.000474019	S100A6, S100A4, S100A11, S100A10	60	28	10692	25.4571	0.0308082	0.0312853	0.0308113
GOTERM_BP_DIRECT	GO:0010628~positive regulation of gene expression	11	9.48276	0.000558285	IL32, TGFBR3, ZNF683, CD74, RPL5, RPS7, MYC, RPL11, LEF1, RPS3, IL7R	111	509	19734	3.84209	0.384478	0.0539055	0.0531611
GOTERM_CC_DIRECT	GO:0009986~cell surface	12	10.3448	0.000752432	CX3CR1, TGFBR3, CD74, ANXA4, F2R, ITGB2, CCR7, HLA-A, CD58, TIGIT, IQGAP2, S100A10	112	657	20887	3.40623	0.138463	0.00697698	0.00616652
GOTERM_CC_DIRECT	GO:0005634~nucleus	50	43.1034	0.0007683	RPL5, RPL30, RPL3, RPLP0, FASLG, RPL10A, RPL9, RPL6, RPS15, RPL7A, RPS18, MYC, RACK1, CAPN2, CLIC1, RPS13, EOMES, ZNF683, RPS9, RPS7, ANXA4, RPL22, RPS6, NOSIP, RPS3A, EEF1A1, PTP4A2, ZEB2, EEF1D, IRF1, S100A6, S100A4, PFN1, RPL10, TCF7, LEF1, UBC, RPS3, RPL13, RPS27A, RPL18, S100A11, CD74, NPM1, GZMA, HOPX, PSMB9, RPS25, NACA, RPS24	112	6175	20887	1.51005	0.141168	0.00697698	0.00616652
GOTERM_CC_DIRECT	GO:0005791~rough endoplasmic reticulum	4	3.44828	0.00077522	MYC, RPL18, RPL6, RPS23	112	34	20887	21.9401	0.142345	0.00697698	0.00616652
BIOCARTA	h_ctlPathway:CTL mediated immune response against target cells	4	3.44828	0.000818295	ITGB2, FASLG, HLA-A, B2M	24	14	1623	19.3214	0.0533712	0.0274129	0.0274129
UP_KW_BIOLOGICAL_PROCESS	KW-0399~Innate immunity	8	6.89655	0.00083117	CX3CR1, FGR, ZNF683, SPON2, GBP5, IRF1, SLAMF7, HLA-A	43	427	11450	4.98884	0.0262576	0.0132987	0.0124675
GOTERM_CC_DIRECT	GO:0045121~membrane raft	7	6.03448	0.000929207	LDHB, ITGB2, CAPN2, EFHD2, ATP2B4, TNFRSF1B, S100A10	112	211	20887	6.18691	0.168121	0.00799926	0.00707005
GOTERM_CC_DIRECT	GO:0036464~cytoplasmic ribonucleoprotein granule	5	4.31034	0.00100524	RPS4X, RPS6, RPLP0, RPL28, RPL6	112	83	20887	11.2344	0.180563	0.00829323	0.00732987
GOTERM_BP_DIRECT	GO:0045727~positive regulation of translation	5	4.31034	0.00109327	RPS4X, RPL5, NPM1, MYC, RPL26	111	81	19734	10.9743	0.613481	0.0950054	0.0936934
GOTERM_MF_DIRECT	GO:0048306~calcium-dependent protein binding	5	4.31034	0.00132618	ANXA4, S100A6, S100A4, S100A11, S100A10	113	82	19304	10.4166	0.278524	0.0407799	0.0394538
GOTERM_BP_DIRECT	GO:1904667~negative regulation of ubiquitin protein ligase activity	3	2.58621	0.00134568	RPL5, RPS7, RPL11	111	10	19734	53.3351	0.68969	0.0974496	0.0961039
GOTERM_BP_DIRECT	GO:0070493~thrombin-activated receptor signaling pathway	3	2.58621	0.00134568	F2R, PLEK, IQGAP2	111	10	19734	53.3351	0.68969	0.0974496	0.0961039
INTERPRO	IPR019954:Ubiquitin_CS	3	2.58621	0.00155949	UBC, FAU, RPS27A	113	11	20607	49.7353	0.491244	0.0964656	0.0955744
INTERPRO	IPR005824:KOW	3	2.58621	0.00155949	RPS4X, RPL14, RPL26	113	11	20607	49.7353	0.491244	0.0964656	0.0955744
INTERPRO	IPR004038:Ribosomal_eL8/eL30/eS12/Gad45	3	2.58621	0.00155949	RPL7A, RPL30, RPS12	113	11	20607	49.7353	0.491244	0.0964656	0.0955744
GOTERM_BP_DIRECT	GO:0043123~positive regulation of canonical NF-kappaB signal transduction	7	6.03448	0.00171849	CX3CR1, CD74, F2R, S100A4, FASLG, CCR7, LTB	111	227	19734	5.48232	0.775674	0.114875	0.113288
GOTERM_BP_DIRECT	GO:0051603~proteolysis involved in protein catabolic process	4	3.44828	0.00201682	GZMA, CAPN2, CTSW, PSMB9	111	45	19734	15.803	0.826987	0.125187	0.123458
GOTERM_CC_DIRECT	GO:0032587~ruffle membrane	5	4.31034	0.00215221	EEF1A1, FGR, PLEK, RPS3, SH3BGRL3	112	102	20887	9.14172	0.347273	0.0170455	0.0150655
INTERPRO	IPR019956:Ubiquitin_dom	3	2.58621	0.00219599	UBC, FAU, RPS27A	113	13	20607	42.0837	0.613996	0.118858	0.11776
INTERPRO	IPR029064:Ribosomal_eL30-like_sf	3	2.58621	0.00293523	RPL7A, RPL30, RPS12	113	15	20607	36.4726	0.71996	0.141217	0.139913
GOTERM_BP_DIRECT	GO:0000028~ribosomal small subunit assembly	3	2.58621	0.00308329	RPS15, RPS19, RPS5	111	15	19734	35.5568	0.931677	0.167461	0.165149
GOTERM_BP_DIRECT	GO:0001913~T cell mediated cytotoxicity	3	2.58621	0.00308329	HLA-A, IL7R, B2M	111	15	19734	35.5568	0.931677	0.167461	0.165149
UP_KW_PTM	KW-0013~ADP-ribosylation	6	5.17241	0.00407571	NPM1, RPS6, UBC, RPL24, RPS3A, RPS27A	103	147	14252	5.64771	0.0821898	0.0224164	0.0213975
GOTERM_MF_DIRECT	GO:0045182~translation regulator activity	3	2.58621	0.00428635	RPS9, RPL10, RACK1	113	17	19304	30.1468	0.652402	0.11716	0.11335
GOTERM_BP_DIRECT	GO:0031640~killing of cells of another organism	4	3.44828	0.00457854	RPL30, RPS19, GNLY, GZMA	111	60	19734	11.8523	0.981461	0.234044	0.230812
UP_SEQ_FEATURE	MOTIF:ITIM motif	3	2.58621	0.00505647	FCRL6, PDCD1, TIGIT	111	20	20569	27.7959	0.901399	0.46183	0.46082
GOTERM_MF_DIRECT	GO:0005102~signaling receptor binding	8	6.89655	0.0057471	FGR, F2R, RACK1, FASLG, HLA-A, LTB, CD58, TIGIT	113	369	19304	3.70367	0.757769	0.141379	0.136781
GOTERM_BP_DIRECT	GO:2000059~negative regulation of ubiquitin-dependent protein catabolic process	3	2.58621	0.006613	RPL5, RPS7, RPL11	111	22	19734	24.2432	0.996867	0.319261	0.314852
GOTERM_BP_DIRECT	GO:0008284~positive regulation of cell population proliferation	9	7.75862	0.00740505	RPS4X, NPM1, RPS9, RPS15A, MYC, RPS6, F2R, FASLG, IL7R	111	506	19734	3.16216	0.998434	0.3246	0.320118
GOTERM_BP_DIRECT	GO:0043066~negative regulation of apoptotic process	9	7.75862	0.00748966	CD74, NPM1, RPL10, MYC, ANXA4, RPS6, ANXA5, LEF1, RPS3A	111	507	19734	3.15593	0.998545	0.3246	0.320118
GOTERM_BP_DIRECT	GO:0071353~cellular response to interleukin-4	3	2.58621	0.00784419	RPL3, TCF7, LEF1	111	24	19734	22.223	0.998934	0.3246	0.320118
GOTERM_CC_DIRECT	GO:0042613~MHC class II protein complex	3	2.58621	0.00836965	CD74, HLA-A, B2M	112	26	20887	21.5182	0.810651	0.0637381	0.0563342
GOTERM_MF_DIRECT	GO:0019901~protein kinase binding	9	7.75862	0.00890765	EEF1A1, FGR, NPM1, RPS7, RPS19, RPS6, ITGB2, RPS3, ATP2B4	113	502	19304	3.06272	0.889319	0.196609	0.190215
GOTERM_BP_DIRECT	GO:0006954~inflammatory response	8	6.89655	0.00940764	CX3CR1, GBP5, F2R, ITGB2, TSPAN2, CCR7, CYBA, TNFRSF1B	111	422	19734	3.37031	0.999729	0.371602	0.366471
GOTERM_MF_DIRECT	GO:0031625~ubiquitin protein ligase binding	7	6.03448	0.00959066	RPL5, SYT11, PYHIN1, UBC, RPL11, RPS27A, TNFRSF1B	113	311	19304	3.84509	0.906584	0.196609	0.190215
UP_KW_BIOLOGICAL_PROCESS	KW-1064~Adaptive immunity	7	6.03448	0.0104498	EOMES, CX3CR1, ZNF683, CD74, SLAMF7, HLA-A, PDCD1	43	513	11450	3.63344	0.285487	0.0953697	0.0894091
GOTERM_CC_DIRECT	GO:0005615~extracellular space	20	17.2414	0.0105344	IL32, GZMA, FASLG, CTSW, HLA-A, TGFBR3, EEF1A1, FCGR3A, SELL, GNLY, UBC, S100A6, S100A4, LTB, FAU, RPS27A, CLIC1, B2M, S100A11, S100A10	112	2033	20887	1.83464	0.87716	0.0759212	0.067102
UP_SEQ_FEATURE	DOMAIN:Elongation factor 1 beta central acidic region eukaryote	2	1.72414	0.0106674	EEF1B2, EEF1D	111	2	20569	185.306	0.992562	0.46183	0.46082
UP_SEQ_FEATURE	DOMAIN:Translation elongation factor EF1B beta/delta subunit guanine nucleotide exchange	2	1.72414	0.0106674	EEF1B2, EEF1D	111	2	20569	185.306	0.992562	0.46183	0.46082
GOTERM_CC_DIRECT	GO:0032991~protein-containing complex	10	8.62069	0.0107363	CD74, RPL5, NPM1, RPL3, RPL10, RPS7, MYC, PYHIN1, RPL11, ATP2B4	112	684	20887	2.72648	0.882025	0.0759212	0.067102
INTERPRO	IPR018940:EF-1_beta_acid_region_euk	2	1.72414	0.0108408	EEF1B2, EEF1D	113	2	20607	182.363	0.991082	0.312938	0.310047
INTERPRO	IPR036219:eEF-1beta-like_sf	2	1.72414	0.0108408	EEF1B2, EEF1D	113	2	20607	182.363	0.991082	0.312938	0.310047
INTERPRO	IPR014038:EF1B_bsu/dsu_GNE	2	1.72414	0.0108408	EEF1B2, EEF1D	113	2	20607	182.363	0.991082	0.312938	0.310047
INTERPRO	IPR001326:Transl_elong_EF1B_B/D_CS	2	1.72414	0.0108408	EEF1B2, EEF1D	113	2	20607	182.363	0.991082	0.312938	0.310047
INTERPRO	IPR002392:ANX5	2	1.72414	0.0108408	ANXA4, ANXA5	113	2	20607	182.363	0.991082	0.312938	0.310047
INTERPRO	IPR049720:EF1B_bsu/dsu	2	1.72414	0.0108408	EEF1B2, EEF1D	113	2	20607	182.363	0.991082	0.312938	0.310047
GOTERM_BP_DIRECT	GO:0050821~protein stabilization	6	5.17241	0.0109371	CD74, RPL5, RPS7, PYHIN1, RPL11, PFN1	111	239	19734	4.46319	0.999929	0.410314	0.404648
SMART	SM00888:EF1_GNE	2	1.72414	0.0110064	EEF1B2, EEF1D	60	2	10692	178.2	0.518306	0.24214	0.238471
SMART	SM01182:EF-1_beta_acid	2	1.72414	0.0110064	EEF1B2, EEF1D	60	2	10692	178.2	0.518306	0.24214	0.238471
GOTERM_BP_DIRECT	GO:0035458~cellular response to interferon-beta	3	2.58621	0.011332	IRF1, PYHIN1, CAPN2	111	29	19734	18.3914	0.99995	0.410314	0.404648
UP_KW_BIOLOGICAL_PROCESS	KW-0945~Host-virus interaction	8	6.89655	0.0119212	CX3CR1, EEF1A1, ZNF683, NPM1, RPS19, RACK1, HLA-A, PSMB9	43	690	11450	3.08729	0.318713	0.0953697	0.0894091
GOTERM_BP_DIRECT	GO:0060326~cell chemotaxis	4	3.44828	0.0139391	CX3CR1, GPR25, LEF1, CCR7	111	90	19734	7.9015	0.999995	0.484523	0.477832
GOTERM_MF_DIRECT	GO:0016493~C-C chemokine receptor activity	3	2.58621	0.0147732	CX3CR1, GPR25, CCR7	113	32	19304	16.0155	0.974301	0.259586	0.251145
GOTERM_MF_DIRECT	GO:0003746~translation elongation factor activity	3	2.58621	0.0147732	EEF1A1, EEF1B2, EEF1D	113	32	19304	16.0155	0.974301	0.259586	0.251145
KEGG_PATHWAY	hsa04514:Cell adhesion molecules	6	5.17241	0.0151145	SELL, ITGB2, HLA-A, CD58, PDCD1, TIGIT	83	157	8840	4.07029	0.886718	0.720459	0.720459
INTERPRO	IPR014717:Transl_elong_EF1B/ribsomal_bS6	2	1.72414	0.0162175	EEF1B2, EEF1D	113	3	20607	121.575	0.999158	0.413068	0.409252
INTERPRO	IPR002391:ANX4	2	1.72414	0.0162175	ANXA4, ANXA5	113	3	20607	121.575	0.999158	0.413068	0.409252
GOTERM_BP_DIRECT	GO:1990145~maintenance of translational fidelity	2	1.72414	0.0166302	RPS23, RPS12	111	3	19734	118.523	1	0.555833	0.548157
INTERPRO	IPR011992:EF-hand-dom_pair	6	5.17241	0.0174802	S100A6, CAPN2, EFHD2, S100A4, S100A11, S100A10	113	276	20607	3.96441	0.999517	0.420495	0.41661
UP_SEQ_FEATURE	DOMAIN:EF-hand 1	5	4.31034	0.0184303	S100A6, CAPN2, EFHD2, S100A4, S100A11	111	188	20569	4.92836	0.999797	0.46183	0.46082
UP_KW_MOLECULAR_FUNCTION	KW-0251~Elongation factor	3	2.58621	0.0193191	EEF1A1, EEF1B2, EEF1D	89	29	11889	13.8191	0.550596	0.19802	0.19802
UP_SEQ_FEATURE	DOMAIN:EF-hand 2	5	4.31034	0.0197433	S100A6, CAPN2, EFHD2, S100A4, S100A11	111	192	20569	4.82569	0.99989	0.46183	0.46082
GOTERM_BP_DIRECT	GO:0032755~positive regulation of interleukin-6 production	4	3.44828	0.0199249	SPON2, CD74, F2R, CYBA	111	103	19734	6.90422	1	0.627009	0.618351
GOTERM_CC_DIRECT	GO:0048471~perinuclear region of cytoplasm	10	8.62069	0.0201669	CX3CR1, GBP5, ANXA4, RPS6, S100A6, RACK1, S100A4, FASLG, TNFRSF1B, CLIC1	112	761	20887	2.45061	0.982294	0.137691	0.121697
GOTERM_BP_DIRECT	GO:0050767~regulation of neurogenesis	3	2.58621	0.0209243	CX3CR1, LEF1, S100A10	111	40	19734	13.3338	1	0.627009	0.618351
GOTERM_BP_DIRECT	GO:0033077~T cell differentiation in thymus	3	2.58621	0.0209243	RPS6, IL7R, B2M	111	40	19734	13.3338	1	0.627009	0.618351
UP_SEQ_FEATURE	DOMAIN:RNA-binding S4	2	1.72414	0.021222	RPS4X, RPS9	111	4	20569	92.6532	0.999945	0.46183	0.46082
UP_SEQ_FEATURE	MUTAGEN:G->A: Loss of ADP-ribosylation.	2	1.72414	0.021222	UBC, RPS27A	111	4	20569	92.6532	0.999945	0.46183	0.46082
UP_SEQ_FEATURE	MUTAGEN:K->R: No effect on HLTF-mediated polyubiquitination of PCNA.	2	1.72414	0.021222	UBC, RPS27A	111	4	20569	92.6532	0.999945	0.46183	0.46082
UP_SEQ_FEATURE	MUTAGEN:R->K: No effect on ADP-ribosylation, when associated with K-72.	2	1.72414	0.021222	UBC, RPS27A	111	4	20569	92.6532	0.999945	0.46183	0.46082
UP_SEQ_FEATURE	REGION:CTNNB1-binding	2	1.72414	0.021222	TCF7, LEF1	111	4	20569	92.6532	0.999945	0.46183	0.46082
UP_SEQ_FEATURE	MUTAGEN:R->K: No effect on ADP-ribosylation, when associated with K-74.	2	1.72414	0.021222	UBC, RPS27A	111	4	20569	92.6532	0.999945	0.46183	0.46082
UP_SEQ_FEATURE	MUTAGEN:K->R: Abolishes HLTF-mediated polyubiquitination of PCNA.	2	1.72414	0.021222	UBC, RPS27A	111	4	20569	92.6532	0.999945	0.46183	0.46082
UP_SEQ_FEATURE	MUTAGEN:R->G: No effect on ADP-ribosylation.	2	1.72414	0.021222	UBC, RPS27A	111	4	20569	92.6532	0.999945	0.46183	0.46082
UP_SEQ_FEATURE	MUTAGEN:H->G: Loss of DTX3L-mediated polyubiquitination of histone H3 and H4.	2	1.72414	0.021222	UBC, RPS27A	111	4	20569	92.6532	0.999945	0.46183	0.46082
UP_SEQ_FEATURE	SITE:Essential for function	2	1.72414	0.021222	UBC, RPS27A	111	4	20569	92.6532	0.999945	0.46183	0.46082
UP_SEQ_FEATURE	DOMAIN:CTNNB1 binding N-teminal	2	1.72414	0.021222	TCF7, LEF1	111	4	20569	92.6532	0.999945	0.46183	0.46082
UP_SEQ_FEATURE	MUTAGEN:S->D: Phosphomimetic mutant that binds and activates PRKN.	2	1.72414	0.021222	UBC, RPS27A	111	4	20569	92.6532	0.999945	0.46183	0.46082
GOTERM_MF_DIRECT	GO:0019900~kinase binding	4	3.44828	0.0215576	EEF1A1, LDHB, RPS3, JAKMIP1	113	102	19304	6.69929	0.995305	0.353544	0.342047
INTERPRO	IPR013558:CTNNB1-bd_N	2	1.72414	0.0215651	TCF7, LEF1	113	4	20607	91.1814	0.999921	0.466885	0.462572
INTERPRO	IPR024940:TCF/LEF	2	1.72414	0.0215651	TCF7, LEF1	113	4	20607	91.1814	0.999921	0.466885	0.462572
GOTERM_BP_DIRECT	GO:0071222~cellular response to lipopolysaccharide	5	4.31034	0.0221918	CX3CR1, SPON2, GBP5, CAPN2, TNFRSF1B	111	191	19734	4.65403	1	0.642824	0.633947
UP_SEQ_FEATURE	DOMAIN:EF-hand	5	4.31034	0.0225394	S100A6, CAPN2, EFHD2, S100A4, S100A11	111	200	20569	4.63266	0.99997	0.468205	0.46718
GOTERM_BP_DIRECT	GO:0061844~antimicrobial humoral immune response mediated by antimicrobial peptide	4	3.44828	0.0230951	RPL30, RPS19, GNLY, FAU	111	109	19734	6.52418	1	0.647408	0.638468
SMART	SM00213:UBQ	3	2.58621	0.0244145	UBC, FAU, RPS27A	60	44	10692	12.15	0.804336	0.360267	0.354808
GOTERM_BP_DIRECT	GO:0032735~positive regulation of interleukin-12 production	3	2.58621	0.0250153	IRF1, CCR7, LTB	111	44	19734	12.1216	1	0.679322	0.669941
UP_SEQ_FEATURE	SITE:Interacts with activating enzyme	2	1.72414	0.0264573	UBC, RPS27A	111	5	20569	74.1225	0.999995	0.525696	0.524546
INTERPRO	IPR002942:S4_RNA-bd	2	1.72414	0.026884	RPS4X, RPS9	113	5	20607	72.9451	0.999992	0.554323	0.549202
SMART	SM00363:S4	2	1.72414	0.0272929	RPS4X, RPS9	60	5	10692	71.28	0.839004	0.360267	0.354808
GOTERM_BP_DIRECT	GO:1902164~positive regulation of DNA damage response, signal transduction by p53 class mediator resulting in transcription of p21 class mediator	2	1.72414	0.0275645	PYHIN1, RPL26	111	5	19734	71.1135	1	0.704515	0.694787
GOTERM_BP_DIRECT	GO:2000435~negative regulation of protein neddylation	2	1.72414	0.0275645	RPL5, RPL11	111	5	19734	71.1135	1	0.704515	0.694787
GOTERM_MF_DIRECT	GO:0005509~calcium ion binding	10	8.62069	0.0295427	SELL, SYT11, ANXA4, ANXA5, S100A6, CAPN2, EFHD2, S100A4, S100A11, S100A10	113	746	19304	2.28997	0.999375	0.454218	0.439447
GOTERM_BP_DIRECT	GO:0019722~calcium-mediated signaling	4	3.44828	0.0308493	CX3CR1, GPR25, FCGR3A, CCR7	111	122	19734	5.82898	1	0.765943	0.755366
UP_SEQ_FEATURE	DOMAIN:S4 RNA-binding	2	1.72414	0.031665	RPS4X, RPS9	111	6	20569	61.7688	1	0.602954	0.601634
INTERPRO	IPR006053:TNF	2	1.72414	0.0321742	FASLG, LTB	113	6	20607	60.7876	0.999999	0.605715	0.600119
INTERPRO	IPR036986:S4_RNA-bd_sf	2	1.72414	0.0321742	RPS4X, RPS9	113	6	20607	60.7876	0.999999	0.605715	0.600119
GOTERM_BP_DIRECT	GO:0050819~negative regulation of coagulation	2	1.72414	0.0329863	ANXA4, ANXA5	111	6	19734	59.2613	1	0.775597	0.764887
GOTERM_MF_DIRECT	GO:0070180~large ribosomal subunit rRNA binding	2	1.72414	0.0343148	RPL12, RPLP0	113	6	19304	56.944	0.999814	0.496555	0.480407
KEGG_PATHWAY	hsa05140:Leishmaniasis	4	3.44828	0.0344512	EEF1A1, FCGR3A, ITGB2, CYBA	83	77	8840	5.53278	0.993352	1	1
KEGG_PATHWAY	hsa05167:Kaposi sarcoma-associated herpesvirus infection	6	5.17241	0.0351945	MYC, TCF7, UBC, LEF1, HLA-A, RPS27A	83	196	8840	3.26039	0.994045	1	1
UP_SEQ_FEATURE	COMPBIAS:Basic residues	9	7.75862	0.0364556	EEF1D, HLA-A, FAU, PFN1, RPL18, RPL29, RPL6, RPS24, RPS23	111	709	20569	2.35227	1	0.647622	0.646205
GOTERM_BP_DIRECT	GO:0001837~epithelial to mesenchymal transition	3	2.58621	0.0365086	TGFBR3, LEF1, S100A4	111	54	19734	9.87688	1	0.775597	0.764887
GOTERM_BP_DIRECT	GO:0048146~positive regulation of fibroblast proliferation	3	2.58621	0.0365086	CD74, MYC, S100A6	111	54	19734	9.87688	1	0.775597	0.764887
UP_SEQ_FEATURE	DOMAIN:KOW	2	1.72414	0.036845	RPL14, RPL26	111	7	20569	52.9447	1	0.647622	0.646205
GOTERM_BP_DIRECT	GO:0050830~defense response to Gram-positive bacterium	4	3.44828	0.0369219	FGR, HLA-A, FAU, IL7R	111	131	19734	5.42851	1	0.775597	0.764887
GOTERM_BP_DIRECT	GO:0006413~translational initiation	3	2.58621	0.0377512	RPS5, RPS3, RPS3A	111	55	19734	9.6973	1	0.775597	0.764887
GOTERM_BP_DIRECT	GO:1902255~positive regulation of intrinsic apoptotic signaling pathway by p53 class mediator	2	1.72414	0.0383782	RPS7, MYC	111	7	19734	50.7954	1	0.775597	0.764887
GOTERM_BP_DIRECT	GO:0002502~peptide antigen assembly with MHC class I protein complex	2	1.72414	0.0383782	HLA-A, B2M	111	7	19734	50.7954	1	0.775597	0.764887
GOTERM_BP_DIRECT	GO:0002606~positive regulation of dendritic cell antigen processing and presentation	2	1.72414	0.0383782	CD74, CCR7	111	7	19734	50.7954	1	0.775597	0.764887
INTERPRO	IPR002048:EF_hand_dom	5	4.31034	0.0384262	S100A6, CAPN2, EFHD2, S100A4, S100A11	113	233	20607	3.91337	1	0.693272	0.686868
UP_KW_DOMAIN	KW-0393~Immunoglobulin domain	8	6.89655	0.0387576	FCGR3A, FCRL6, SLAMF7, HLA-A, CD58, PDCD1, TIGIT, B2M	60	788	14597	2.46988	0.468716	0.441184	0.441184
GOTERM_CC_DIRECT	GO:0012507~ER to Golgi transport vesicle membrane	3	2.58621	0.0393495	CD74, HLA-A, B2M	112	59	20887	9.4826	0.999647	0.259707	0.229539
UP_KW_BIOLOGICAL_PROCESS	KW-0306~Gastrulation	2	1.72414	0.0396344	EOMES, RACK1	43	11	11450	48.4144	0.725861	0.25366	0.237806
GOTERM_MF_DIRECT	GO:0042289~MHC class II protein binding	2	1.72414	0.0399193	CD74, FCRL6	113	7	19304	48.8091	0.999956	0.525505	0.508416
GOTERM_BP_DIRECT	GO:0034644~cellular response to UV	3	2.58621	0.0402842	NPM1, MYC, RPL26	111	57	19734	9.35704	1	0.791882	0.780947
GOTERM_MF_DIRECT	GO:0005544~calcium-dependent phospholipid binding	3	2.58621	0.0405878	SYT11, ANXA4, ANXA5	113	55	19304	9.3181	0.999963	0.525505	0.508416
GOTERM_BP_DIRECT	GO:0007267~cell-cell signaling	5	4.31034	0.0420435	CX3CR1, FGFBP2, ITGB2, FASLG, LTB	111	234	19734	3.7988	1	0.791882	0.780947
INTERPRO	IPR000626:Ubiquitin-like_dom	3	2.58621	0.0435246	UBC, FAU, RPS27A	113	61	20607	8.96866	1	0.753847	0.746883
GOTERM_BP_DIRECT	GO:0061384~heart trabecula morphogenesis	2	1.72414	0.0437403	TGFBR3, NACA	111	8	19734	44.4459	1	0.791882	0.780947
GOTERM_BP_DIRECT	GO:0051001~negative regulation of nitric-oxide synthase activity	2	1.72414	0.0437403	ATP2B4, NOSIP	111	8	19734	44.4459	1	0.791882	0.780947
GOTERM_BP_DIRECT	GO:0019941~modification-dependent protein catabolic process	2	1.72414	0.0437403	UBC, RPS27A	111	8	19734	44.4459	1	0.791882	0.780947
GOTERM_MF_DIRECT	GO:0070181~small ribosomal subunit rRNA binding	2	1.72414	0.0454917	RPS3, RPS13	113	8	19304	42.708	0.999989	0.559547	0.541351
KEGG_PATHWAY	hsa05216:Thyroid cancer	3	2.58621	0.0459189	MYC, TCF7, LEF1	83	37	8840	8.63562	0.998796	1	1
UP_SEQ_FEATURE	DOMAIN:Ubiquitin-like	3	2.58621	0.0460957	UBC, FAU, RPS27A	111	64	20569	8.68623	1	0.780212	0.778505
GOTERM_CC_DIRECT	GO:0042612~MHC class I protein complex	2	1.72414	0.0468334	HLA-A, B2M	112	9	20887	41.4425	0.999925	0.299129	0.264382
GOTERM_BP_DIRECT	GO:0006915~apoptotic process	8	6.89655	0.0481171	GZMA, IRF1, ITGB2, RPS3, RACK1, FASLG, PDCD1, EMP3	111	593	19734	2.39843	1	0.81377	0.802533
SMART	SM00054:EFh	4	3.44828	0.0489524	S100A6, EFHD2, S100A4, S100A11	60	149	10692	4.78389	0.963579	0.538477	0.530318
GOTERM_BP_DIRECT	GO:0032651~regulation of interleukin-1 beta production	2	1.72414	0.0490728	F2R, CCR7	111	9	19734	39.5075	1	0.81377	0.802533
GOTERM_BP_DIRECT	GO:0045428~regulation of nitric oxide biosynthetic process	2	1.72414	0.0490728	CX3CR1, NOSIP	111	9	19734	39.5075	1	0.81377	0.802533
GOTERM_BP_DIRECT	GO:0000056~ribosomal small subunit export from nucleus	2	1.72414	0.0490728	RPS15, NPM1	111	9	19734	39.5075	1	0.81377	0.802533
GOTERM_BP_DIRECT	GO:0032757~positive regulation of interleukin-8 production	3	2.58621	0.0496316	CD74, F2R, CD58	111	64	19734	8.33361	1	0.81377	0.802533
GOTERM_CC_DIRECT	GO:0005886~plasma membrane	39	33.6207	0.0497267	CX3CR1, SPON2, GPR25, PLEK, ITGB2, FASLG, IQGAP2, FCGR3A, UBC, RPS3, CAPN2, SLAMF7, CCR7, TSPAN2, CD58, RPS27A, TIGIT, CLIC1, B2M, S100A10, CD74, FCRL6, ANXA4, F2R, ATP2B4, CYBA, EMP3, HLA-A, TNFRSF1B, TGFBR3, FGR, EEF1A1, PTP4A2, SELL, SYT11, S100A6, PDCD1, LTB, IL7R	112	5592	20887	1.30064	0.999959	0.307684	0.271943
UP_KW_LIGAND	KW-0111~Calcium/phospholipid-binding	2	1.72414	0.0506361	ANXA4, ANXA5	25	15	6947	37.0507	0.516877	0.354453	0.354453
GOTERM_MF_DIRECT	GO:0008097~5S rRNA binding	2	1.72414	0.0510319	RPL5, RPL11	113	9	19304	37.9626	0.999997	0.597802	0.578362
GOTERM_CC_DIRECT	GO:0042824~MHC class I peptide loading complex	2	1.72414	0.051901	HLA-A, B2M	112	10	20887	37.2982	0.999974	0.311406	0.275232
UP_KW_CELLULAR_COMPONENT	KW-0490~MHC I	2	1.72414	0.0519433	HLA-A, B2M	107	9	17942	37.2627	0.736453	0.649291	0.649291
UP_SEQ_FEATURE	DOMAIN:Ribosomal protein eL8/eL30/eS12/Gadd45	2	1.72414	0.0522209	RPL7A, RPL30	111	10	20569	37.0613	1	0.85232	0.850455
GOTERM_BP_DIRECT	GO:0034695~response to prostaglandin E	2	1.72414	0.0543758	TGFBR3, CCR7	111	10	19734	35.5568	1	0.843796	0.832145
GOTERM_BP_DIRECT	GO:1901798~positive regulation of signal transduction by p53 class mediator	2	1.72414	0.0543758	RPS15, RPL11	111	10	19734	35.5568	1	0.843796	0.832145
GOTERM_BP_DIRECT	GO:0019885~antigen processing and presentation of endogenous peptide antigen via MHC class I	2	1.72414	0.0543758	HLA-A, B2M	111	10	19734	35.5568	1	0.843796	0.832145
UP_KW_DOMAIN	KW-0041~Annexin	2	1.72414	0.055148	ANXA4, ANXA5	60	14	14597	34.7548	0.596521	0.441184	0.441184
GOTERM_MF_DIRECT	GO:0004859~phospholipase inhibitor activity	2	1.72414	0.0565403	ANXA4, ANXA5	113	10	19304	34.1664	0.999999	0.632223	0.611663
GOTERM_BP_DIRECT	GO:0007204~positive regulation of cytosolic calcium ion concentration	4	3.44828	0.0567253	CX3CR1, GPR25, F2R, CCR7	111	156	19734	4.55856	1	0.864813	0.85287
KEGG_PATHWAY	hsa04060:Cytokine-cytokine receptor interaction	7	6.03448	0.0579178	IL32, CX3CR1, FASLG, CCR7, LTB, IL7R, TNFRSF1B	83	298	8840	2.50182	0.999803	1	1
GOTERM_CC_DIRECT	GO:0030666~endocytic vesicle membrane	3	2.58621	0.0590348	CD74, UBC, RPS27A	112	74	20887	7.56045	0.999994	0.34196	0.302237
GOTERM_BP_DIRECT	GO:0002726~positive regulation of T cell cytokine production	2	1.72414	0.0596495	HLA-A, B2M	111	11	19734	32.3243	1	0.893715	0.881374
GOTERM_CC_DIRECT	GO:0005901~caveola	3	2.58621	0.0604474	F2R, ATP2B4, FASLG	112	75	20887	7.45964	0.999996	0.34196	0.302237
GOTERM_MF_DIRECT	GO:0050998~nitric-oxide synthase binding	2	1.72414	0.062017	CD74, ATP2B4	113	11	19304	31.0603	1	0.656134	0.634796
INTERPRO	IPR021184:TNF_CS	2	1.72414	0.0633222	FASLG, LTB	113	12	20607	30.3938	1	1	0.993056
GOTERM_MF_DIRECT	GO:0001786~phosphatidylserine binding	3	2.58621	0.064013	SYT11, ANXA4, ANXA5	113	71	19304	7.21825	1	0.656134	0.634796
GOTERM_BP_DIRECT	GO:0045060~negative thymic T cell selection	2	1.72414	0.0648941	CD74, CCR7	111	12	19734	29.6306	1	0.955813	0.942614
GOTERM_CC_DIRECT	GO:1990907~beta-catenin-TCF complex	2	1.72414	0.0669442	TCF7, LEF1	112	13	20887	28.6909	0.999999	0.368193	0.325423
UP_SEQ_FEATURE	CROSSLNK:Glycyl lysine isopeptide (Gly-Lys) (interchain with K-? in acceptor proteins)	2	1.72414	0.0673535	UBC, RPS27A	111	13	20569	28.5087	1	0.972393	0.970265
UP_SEQ_FEATURE	DOMAIN:Ig-like	8	6.89655	0.0680884	FCGR3A, FCRL6, SLAMF7, HLA-A, CD58, PDCD1, TIGIT, B2M	111	670	20569	2.21261	1	0.972393	0.970265
GOTERM_BP_DIRECT	GO:0000470~maturation of LSU-rRNA	2	1.72414	0.0701097	RPL7A, RPL10A	111	13	19734	27.3514	1	1	0.987327
GOTERM_CC_DIRECT	GO:0031982~vesicle	4	3.44828	0.0702765	SYT11, UBC, RPS27A, CLIC1	112	179	20887	4.1674	0.999999	0.376075	0.332389
GOTERM_MF_DIRECT	GO:0042803~protein homodimerization activity	9	7.75862	0.0703175	GBP5, NPM1, GZMA, PLEK, S100A6, RACK1, B2M, S100A11, S100A10	113	750	19304	2.04998	1	0.677318	0.655291
GOTERM_MF_DIRECT	GO:0003729~mRNA binding	5	4.31034	0.0715864	MYC, RPS5, RPS3, RPL24, RPS13	113	269	19304	3.17531	1	0.677318	0.655291
GOTERM_BP_DIRECT	GO:0006919~activation of cysteine-type endopeptidase activity involved in apoptotic process	3	2.58621	0.0719216	F2R, RACK1, FASLG	111	79	19734	6.75128	1	1	0.987327
UP_SEQ_FEATURE	REPEAT:Annexin 2	2	1.72414	0.0723443	ANXA4, ANXA5	111	14	20569	26.4723	1	0.972393	0.970265
UP_SEQ_FEATURE	REPEAT:Annexin 4	2	1.72414	0.0723443	ANXA4, ANXA5	111	14	20569	26.4723	1	0.972393	0.970265
UP_SEQ_FEATURE	REPEAT:Annexin 1	2	1.72414	0.0723443	ANXA4, ANXA5	111	14	20569	26.4723	1	0.972393	0.970265
UP_SEQ_FEATURE	REPEAT:Annexin 3	2	1.72414	0.0723443	ANXA4, ANXA5	111	14	20569	26.4723	1	0.972393	0.970265
INTERPRO	IPR037104:Annexin_sf	2	1.72414	0.0734825	ANXA4, ANXA5	113	14	20607	26.0518	1	1	0.993056
INTERPRO	IPR018502:Annexin_repeat	2	1.72414	0.0734825	ANXA4, ANXA5	113	14	20607	26.0518	1	1	0.993056
INTERPRO	IPR018252:Annexin_repeat_CS	2	1.72414	0.0734825	ANXA4, ANXA5	113	14	20607	26.0518	1	1	0.993056
INTERPRO	IPR001464:Annexin	2	1.72414	0.0734825	ANXA4, ANXA5	113	14	20607	26.0518	1	1	0.993056
SMART	SM00335:ANX	2	1.72414	0.0745871	ANXA4, ANXA5	60	14	10692	25.4571	0.994	0.699483	0.688885
GOTERM_BP_DIRECT	GO:0062009~secondary palate development	2	1.72414	0.0752964	TGFBR3, LEF1	111	14	19734	25.3977	1	1	0.987327
GOTERM_BP_DIRECT	GO:0031529~ruffle organization	2	1.72414	0.0752964	PLEK, CCR7	111	14	19734	25.3977	1	1	0.987327
GOTERM_BP_DIRECT	GO:0032233~positive regulation of actin filament bundle assembly	2	1.72414	0.0752964	PLEK, PFN1	111	14	19734	25.3977	1	1	0.987327
INTERPRO	IPR018247:EF_Hand_1_Ca_BS	4	3.44828	0.0760177	S100A6, CAPN2, S100A4, S100A11	113	181	20607	4.03012	1	1	0.993056
GOTERM_CC_DIRECT	GO:0030670~phagocytic vesicle membrane	3	2.58621	0.0767169	CYBA, HLA-A, B2M	112	86	20887	6.5055	1	0.399735	0.353302
GOTERM_MF_DIRECT	GO:0031386~protein tag activity	2	1.72414	0.0782588	UBC, RPS27A	113	14	19304	24.4046	1	0.690169	0.667724
GOTERM_MF_DIRECT	GO:0140297~DNA-binding transcription factor binding	4	3.44828	0.0785558	NPM1, EEF1D, MYC, RPS3	113	172	19304	3.97283	1	0.690169	0.667724
GOTERM_BP_DIRECT	GO:0045087~innate immune response	7	6.03448	0.0793467	CX3CR1, FGR, ZNF683, SPON2, GBP5, CYBA, HLA-A	111	536	19734	2.3218	1	1	0.987327
GOTERM_BP_DIRECT	GO:0070848~response to growth factor	2	1.72414	0.0804545	MYC, FASLG	111	15	19734	23.7045	1	1	0.987327
KEGG_PATHWAY	hsa05132:Salmonella infection	6	5.17241	0.0832698	MYC, TCF7, LEF1, RPS3, PFN1, S100A10	83	251	8840	2.54596	0.999996	1	1
GOTERM_CC_DIRECT	GO:0035579~specific granule membrane	3	2.58621	0.0845202	ITGB2, CYBA, TNFRSF1B	112	91	20887	6.14806	1	0.429102	0.379257
SMART	SM00207:TNF	2	1.72414	0.0847858	FASLG, LTB	60	16	10692	22.275	0.997113	0.699483	0.688885
GOTERM_BP_DIRECT	GO:0007165~signal transduction	12	10.3448	0.0849551	IL32, FGR, NPM1, ANXA4, ANXA5, S100A6, FASLG, LTB, IQGAP2, IL7R, CLIC1, S100A11	111	1240	19734	1.72049	1	1	0.987327
GOTERM_BP_DIRECT	GO:0001829~trophectodermal cell differentiation	2	1.72414	0.0855841	EOMES, HOPX	111	16	19734	22.223	1	1	0.987327
GOTERM_BP_DIRECT	GO:0060074~synapse maturation	2	1.72414	0.0855841	CX3CR1, PFN1	111	16	19734	22.223	1	1	0.987327
UP_KW_BIOLOGICAL_PROCESS	KW-0810~Translation regulation	3	2.58621	0.0886579	RPL10, RPS3, RACK1	43	136	11450	5.8738	0.948737	0.472842	0.44329
GOTERM_MF_DIRECT	GO:0044548~S100 protein binding	2	1.72414	0.0889315	S100A6, S100A11	113	16	19304	21.354	1	0.729238	0.705523
GOTERM_MF_DIRECT	GO:0001046~core promoter sequence-specific DNA binding	2	1.72414	0.0889315	NPM1, MYC	113	16	19304	21.354	1	0.729238	0.705523
UP_SEQ_FEATURE	DOMAIN:TNF family profile	2	1.72414	0.0920443	FASLG, LTB	111	18	20569	20.5896	1	1	1
UP_SEQ_FEATURE	DOMAIN:THD	2	1.72414	0.0920443	FASLG, LTB	111	18	20569	20.5896	1	1	1
GOTERM_BP_DIRECT	GO:0051897~positive regulation of phosphatidylinositol 3-kinase/protein kinase B signal transduction	4	3.44828	0.0922513	CX3CR1, FGR, F2R, CCR7	111	192	19734	3.70383	1	1	0.987327
INTERPRO	IPR012340:NA-bd_OB-fold	3	2.58621	0.0927677	PYHIN1, RPL8, RPS23	113	94	20607	5.82009	1	1	0.993056
INTERPRO	IPR006052:TNF_dom	2	1.72414	0.0934764	FASLG, LTB	113	18	20607	20.2625	1	1	0.993056
GOTERM_MF_DIRECT	GO:0008201~heparin binding	4	3.44828	0.0963022	TGFBR3, SELL, RPL22, RPL29	113	188	19304	3.63472	1	0.764205	0.739353
UP_SEQ_FEATURE	DOMAIN:Immunoglobulin C1-set	2	1.72414	0.0969042	HLA-A, B2M	111	19	20569	19.5059	1	1	1
